# Supplementary material for: Alkynes as masked ylides: Gold-catalysed intermolecular reactions of propargylic carboxylates with sulfides
Source: Royal Society of Chemistry journal article supplement (doi:10.1039/b714813e), 2007-11-12

# SUPPORTING INFORMATION

## Alkynes as Masked Ylides: Gold Catalysed Intermolecular Reactions of Propargylic Carboxylates with Thioethers.

**Paul W. Davies\* and Sébastien J.-C. Albrecht**

*School of Chemistry, University of Birmingham, Edgbaston, Birmingham, B15 2TT,  
UK.*

*E-mail: p.w.davies@bham.ac.uk*

|                              |           |
|------------------------------|-----------|
| <b>General Experimental</b>  | <b>2</b>  |
| <b>Starting Materials</b>    | <b>3</b>  |
| <b>Products</b>              | <b>5</b>  |
| <b>References</b>            | <b>10</b> |
| <b>NMR Comparison Tables</b> | <b>11</b> |
| <b>HPLC data (Scheme 5)</b>  | <b>13</b> |
| <b>NMR Spectra</b>           | <b>16</b> |

## General Experimental

All reactions were carried out under Ar in flame-dried glassware. The solvents used were purified by distillation over the drying agents indicated and were transferred under Ar: THF (Na), Et<sub>2</sub>O (Na), CH<sub>2</sub>Cl<sub>2</sub> (P<sub>4</sub>O<sub>10</sub>), Et<sub>3</sub>N (CaH<sub>2</sub>), toluene (Na). Anhydrous ClCH<sub>2</sub>CH<sub>2</sub>Cl was purchased from Aldrich.

Flash chromatography: Fluorochem silica gel 60 (40-63 μ). IR: Perkin–Elmer Paragon 1600 FTIR spectrometer spectrometer, wavenumbers ( $\tilde{\nu}$ ) in cm<sup>-1</sup>. MS and HRMS (EI): VG-ZabSpec, MS and HRMS (ES): Micromass LCT. Melting points: Kofler hot stage. Elemental analyses: Carlo Erba EA1110. All commercially available compounds (Fluka, Lancaster, Aldrich) were used as received. NMR: Spectra were recorded on Bruker AC300, AV300 and Bruker AV400 spectrometer in the solvents indicated; chemical shifts ( $\delta$ ) are given in ppm relative to TMS, coupling constants ( $J$ ) in Hz. The solvent signals were used as references and the chemical shifts converted to the TMS scale (CDCl<sub>3</sub>:  $\delta_C \equiv 77.0$  ppm; residual CHCl<sub>3</sub> in CDCl<sub>3</sub>:  $\delta_H \equiv 7.26$  ppm; CD<sub>2</sub>Cl<sub>2</sub>:  $\delta_C \equiv 53.8$  ppm; residual CH<sub>2</sub>Cl<sub>2</sub> in CD<sub>2</sub>Cl<sub>2</sub>:  $\delta_H \equiv 5.32$  ppm).

***Where indicated, the signal assignments in the NMR spectra are unambiguous;*** the numbering scheme is arbitrary and is shown in the inserts. The assignments are based upon 1D and 2D spectra recorded using the following pulse sequences from the Bruker standard pulse program library: PENDANT, DEPT 45, DEPT 135; Gradient COSY 90; Gradient HSQC for  $^1J(C,H) = 145$  Hz; Gradient HMBC for correlations via  $^nJ(C,H)$ . HPLC was performed on a Dionex Summit instrument: %ee determined by HPLC (Chiralpak AD column, 2-propanol : hexane = 5 : 95)

## Starting Materials

*All the propargylic carboxylate derivatives were prepared using the following standard procedure from the propargylic alcohol.*

**Acylation Reaction: General Procedure (GP 1).** The acylating reagent (1.2 eq.) is added to a solution of triethylamine (1.4 eq.) and propargylic alcohol (1 eq.) in dichloromethane (4 ml/mmol) at 0 °C under Ar. The reaction mixture is stirred 1-2 h and then treated with sat.  $\text{NH}_4\text{Cl}_{(\text{aq})}$ , then with brine and extracted with ethyl acetate. Removal of solvent under reduced pressure affords a residue which is purified by flash chromatography in ethyl acetate/hexanes to afford the analytically pure propargylic carboxylates.

The following compounds were prepared by this method:

### 1-Phenylprop-2-ynyl benzoate

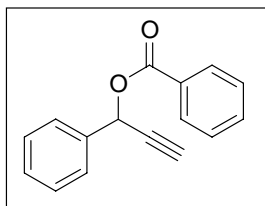

colourless crystals (4.66 mmol, 83% yield);  $^1\text{H-NMR}$  (300 MHz,  $\text{CDCl}_3$ ):  $\delta$  = 8.08 (m, 2 H), 7.64-7.65 (m, 3 H), 7.47-7.39 (m, 5 H), 6.70 (d,  $J$  2.2, 1 H), 2.70 (d,  $J$  2.2, 1 H);  $^{13}\text{C-NMR}$  (75 MHz,  $\text{CDCl}_3$ ):  $\delta$  = 165.2, 136.5, 133.3, 129.8 (2 C), 129.5, 129.0, 128.7 (2 C), 128.3 (2 C), 127.6 (2 C), 80.2, 75.6, 65.8; IR (NaCl):  $\nu$  = 3300, 1723, 1105, 1095, 739, 705; HR-MS (ES-TOF):  $m/z$ : calcd for  $\text{C}_{16}\text{H}_{12}\text{O}_2\text{Na}$ : 259.0735, found 259.0730 [ $M+\text{Na}$ ].

### 1-Phenylprop-2-ynyl 2,2,2-trifluoroacetate

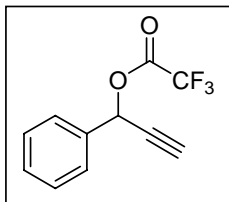

colourless oil (8.10 mmol, quant.);  $^1\text{H-NMR}$  (300 MHz,  $\text{CDCl}_3$ ):  $\delta$  = 7.57 (m, 2 H), 7.44 (m, 3 H), 6.52 (d,  $J$  2.3, 1 H), 2.82 (d,  $J$  2.3, 1 H);  $^{13}\text{C-NMR}$  (75 MHz,  $\text{CDCl}_3$ ):  $\delta$  = 156.4 (q,  $J$  43.1), 134.1, 130.0, 129.0 (2 C), 128.0 (2 C), 114.3 (q,  $J$  285.8), 77.9, 77.7, 69.5; IR (NaCl):  $\nu$  = 3300, 1789, 1372, 1226, 1172, 1147, 891, 760, 696; MS(EI) 228 ( $M^+$ , 31%), 159 (5), 131 (22), 115 (100).

### 1-(2-bromophenyl)prop-2-ynyl acetate

$n\text{-BuLi}$  (2.5 M solution in hexanes, 3.2 mL, 8.5 mmol) was added to a solution of ethynyltrimethylsilane (1.2 mL, 8.5 mmol) in anhydrous THF (20 mL) at -78 °C under Ar. The reaction was stirred at -78 °C for 20 min before the addition of the *o*-bromobenzaldehyde (0.7 mL, 6 mmol). The resulting mixture was allowed to warm to 0 °C and was stirred for 2 h. The reaction mixture was quenched with aqueous  $\text{NH}_4\text{Cl}$ , and extracted with ethyl acetate.

The combined organic phases were washed with brine, dried over Na<sub>2</sub>SO<sub>4</sub> and filtered. After evaporation of the filtrate, the residue was treated with K<sub>2</sub>CO<sub>3</sub> (12 mmol) in methanol (20 mL). The mixture was stirred at RT until hydrolysis was complete. The reaction mixture was quenched with aqueous NH<sub>4</sub>Cl, and extracted with diethyl ether. The combined organic phases were washed with brine, dried over Na<sub>2</sub>SO<sub>4</sub> and filtered. After evaporation of the filtrate, the desired propargylic carboxylate was prepared according to **GP 1**:

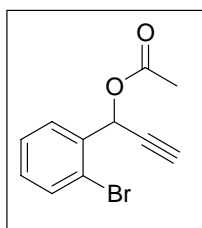

colourless solid (1.29 g, 5.09 mmol, 85%); <sup>1</sup>H-NMR (300 MHz, CDCl<sub>3</sub>): δ = 7.79 (dd, *J* 7.7 and 1.7, 1 H), 7.59 (dd, *J* 7.7 and 1.3, 1 H), 7.39 (ddd, *J* 7.7, 7.6 and 1.3, 1 H), 7.25 (ddd, *J* 7.7, 7.6 and 1.7, 1 H), 6.68 (d, *J* 2.3, 1 H), 2.67 (d, *J* 2.3, 1 H), 2.14 (s, 3 H); <sup>13</sup>C-NMR (75 MHz, CDCl<sub>3</sub>): δ = 169.3, 135.4, 133.1, 130.6, 129.5, 127.7, 123.3, 79.3, 75.8, 64.8, 20.7; IR (NaCl): ν = 3300, 1744, 1371, 1225, 1021, 960, 739, 705; HR-MS (ES-TOF): *m/z*: calcd for C<sub>11</sub>H<sub>19</sub>O<sub>2</sub>NaBr: 274.9684, found 274.9678 [*M*+Na].

*All the thioether derivatives were prepared by alkylation of the corresponding thiol using a modified variant of the method reported by Ono.<sup>1</sup>*

#### Alkylation Reaction: General Procedure (GP 3).

To a mixture of thiol (9.8 mmol) and DBU (10.8 mmol) in toluene (30 mL) at 0 °C under Ar was slowly added allyl bromide (10.8 mmol). The reaction mixture was then stirred at RT for 1-3 h and was treated with aqueous NH<sub>4</sub>Cl, then with brine and was extracted with ethyl acetate. The combined organic phases were dried over Na<sub>2</sub>SO<sub>4</sub>, filtered, and the solvent removed under reduce pressure to give the crude sulfide. The residue was purified through silica gel flash column chromatography (hexanes/ethyl acetate) or by distillation to give the desired sulfide.

The following compounds were prepared by this method:

#### Allyl phenylsulfide

(Quant. yield). Spectroscopic data were identical to those reported in literature.<sup>2</sup>

#### Allyl (p-tolyl)sulfide

(Quant. yield). Spectroscopic data were identical to those reported in literature.<sup>3</sup>

#### Allyl (4-methoxyphenyl)sulfide

(95% yield). Spectroscopic data were identical to those reported in literature.<sup>4</sup>



### Allyl (2-bromophenyl)sulfide

(82% yield). Spectroscopic data were identical to those reported in literature.<sup>5</sup>

### Propargyl phenylsulfide

(Quant. yield). Spectroscopic data were identical to those reported in literature.<sup>6</sup>

### Allyl(4-(trifluoromethyl)phenyl)sulfide

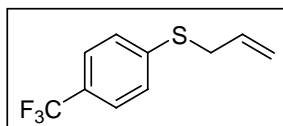

Colourless oil (quant. yield); <sup>1</sup>H-NMR (300 MHz, CDCl<sub>3</sub>): δ = 7.51 (d, *J* 8.2, 2 H), 7.37 (d, *J* 8.2, 2 H), 5.88 (ddt, *J* 16.9, 10.0 and 6.7, 1 H), 5.24 (dq, *J* 16.9 and 1.3, 1 H), 5.15 (dq, *J* 10.0 and 1.1, 1 H), 3.62 (ddd, *J* 6.7, 1.3 and 1.1, 2 H); <sup>13</sup>C-NMR (75 MHz, CDCl<sub>3</sub>): δ = 141.6, 132.7, 130.8 (q, *J* 33), 128.0 (2 C), 127.4, 125.5 (2 C), 124.1 (q, *J* = 272 Hz), 118.3, 35.8; IR (NaCl): ν = 3086, 2982, 2919, 1607, 1402, 1328, 1165, 1124, 1096, 1064, 1014, 924, 824, 734; MS(EI) 218 (M<sup>+</sup>, 100%).

### Allyl(4-bromophenyl)sulfide

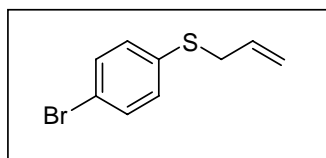

The title compound was obtained according to the general procedure as a colourless oil (quant. yield); <sup>1</sup>H-NMR (300 MHz, CDCl<sub>3</sub>): δ = 7.39 (d, *J* 8.3, 2 H), 7.20 (d, *J* 8.3, 2 H), 5.85 (m, 1 H), 5.10 (m, 2 H), 3.52 (d, *J* 6.8, 2 H); <sup>13</sup>C-NMR (75 MHz, CDCl<sub>3</sub>): δ = 135.0, 133.0, 131.6 (2 C), 131.2 (2 C), 119.9, 117.8, 37.0; IR (NaCl): ν = 3081, 3009, 2978, 2916, 1636, 1473, 1092, 1008, 920, 807, 734; MS(EI) 229 (M<sup>+</sup>, 100%)

## Products

### General Procedure for the Gold-Catalyzed Rearrangement-Coupling Reaction (Table 2)

AuCl (1.4 μmol, 5 mol%) was added to a solution of the propargylic carboxylate (0.29 mmol) and the thioether in 1,2-DCE (0.1 M). The resulting mixture was stirred at 70 °C under an atmosphere until the reaction was complete (GC/MS and TLC). The crude mixture was rapidly filtered under a plug of silica and the solvent was evaporated. The residue was either purified by flash chromatography (hexane/ethyl acetate, 95/5) to give the enol acetate derivative in analytically pure form, or the crude mixture was dissolved in MeOH (2 mL) and K<sub>2</sub>CO<sub>3</sub> (2 eq) was added. The mixture was stirred at RT until hydrolysis was complete and quenched with aqueous NH<sub>4</sub>Cl, and extracted with diethyl ether. The combined organic phases were washed with brine, dried over Na<sub>2</sub>SO<sub>4</sub> and filtered. After evaporation of the solvent, the residue was purified through silica gel flash chromatography (hexanes / ethyl acetate, 95/5) to yield to the desired compounds.

The following compounds were prepared by this method:

**(Z)-3-Phenyl-1-(phenylthio)hexa-1,5-dien-2-yl acetate, 9a**

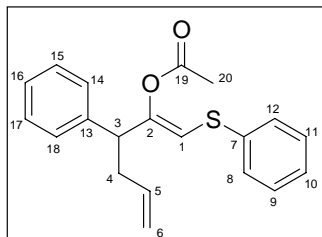

Pale yellow oil;  $^1\text{H-NMR}$  (400 MHz,  $\text{CDCl}_3$ ):  $\delta$  = 7.35-7.20 (m, 10 H, H-Ar), 5.95 (d,  $J$  0.8, 1 H, H-1), 5.71 (ddt,  $J$  17.0, 10.2 and 6.8, 1 H, H-5), 5.07 (ddt,  $J$  17.0, 1.5 and 1.5, 1 H, H-6a), 5.01 (ddt,  $J$  10.2, 1.5 and 1.5, 1 H, H-6b), 3.67 (t,  $J$  7.6, 1 H, H-3), 2.71 (m, 1 H, H-4a), 2.55 (m, 1 H, H-4b), 2.11 (s, 3 H, H-20);  $^{13}\text{C-NMR}$  (75 MHz,  $\text{CDCl}_3$ ):  $\delta$  = 167.7 (C-19), 151.6 (C-2), 139.9 (C-13), 135.6 (C-5), 135.3 (C-7), 129.2 (2 C), 129.0 (2 C), 128.5 (2 C), 128.2 (2 C), 127.0, 126.6, 116.9 (C-6), 111.9 (C-1), 49.8 (C-3), 37.1 (C-4), 20.5 (C-20); IR (NaCl):  $\nu$  = 3060, 3027, 2978, 2921, 1759, 1582, 1479, 1440, 1368, 1194, 1134, 1024, 1012, 916, 742, 702, 692; HR-MS (ES-TOF):  $m/z$ : calcd for  $\text{C}_{20}\text{H}_{20}\text{O}_2\text{NaS}$ : 347.1082, found 347.1086 [ $M+\text{Na}$ ].

**(Z)-3-Phenyl-1-(phenylthio)hexa-1,5-dien-2-yl pivalate, 9b**

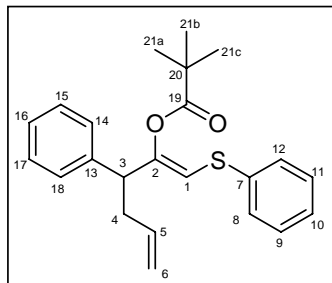

Colourless solid;  $^1\text{H-NMR}$  (300 MHz,  $\text{CDCl}_3$ ):  $\delta$  = 7.35-7.20 (m, 10 H, H-Ar), 5.96 (s, 1 H, H-1), 5.71 (m, 1 H, H-5), 5.02 (m, 2 H, H-6), 3.70 (t,  $J$  7.5, 1 H, H-3), 2.71 (m, 1 H, H-4a), 2.54 (m, 1 H, H-4b), 1.17 (s, 9 H, H-21);  $^{13}\text{C-NMR}$  (75 MHz,  $\text{CDCl}_3$ ):  $\delta$  = 175.4 (C-19), 151.5 (C-2), 140.1 (C-13), 135.7 (C-5, C-7), 129.2 (2 C), 129.0 (2 C), 128.3 (4 C), 127.0, 126.5, 116.8 (C-6), 111.8 (C-1), 49.7 (C-3), 39.1 (C-20), 37.1 (C-4), 27.0 (C-21); IR (NaCl):  $\nu$  = 3063, 3029, 2976, 2933, 2872, 1746, 1479, 1115, 1026, 918, 739, 702; HR-MS (ES-TOF):  $m/z$ : calcd for  $\text{C}_{23}\text{H}_{26}\text{O}_2\text{NaS}$ : 389.1551, found 389.1548 [ $M+\text{Na}$ ].

**(Z)-3-Phenyl-1-(phenylthio)hexa-1,5-dien-2-yl benzoate, 9c**

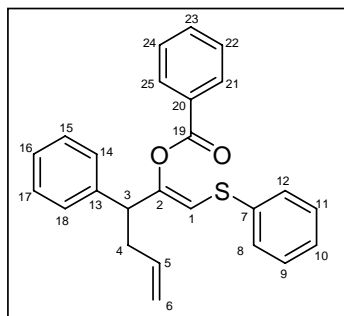

Colourless solid;  $^1\text{H-NMR}$  (300 MHz,  $\text{CDCl}_3$ ):  $\delta$  = 8.01 (d,  $J$  7.9, 2 H, H-21, H-25), 7.58 (t,  $J$  7.4, 1 H, H-23), 7.43 (t,  $J$  7.9, 2 H, H-22, H-24), 7.33-7.19 (m, 10 H, H-Ar), 6.05 (s, 1 H, H-1), 5.77 (m, 1 H, H-5), 5.08 (dd,  $J$  17.1 and 1.3, 1H, H-6a), 5.01 (dd,  $J$  10.2 and 1.3, 1 H, H-6b), 3.82 (t,  $J$  7.5, 1 H, H-3), 2.80 (m, 1 H, H-4a), 2.63 (m, 1 H, H-4b);  $^{13}\text{C-NMR}$  (75 MHz,  $\text{CDCl}_3$ ):  $\delta$  = 163.5 (C-19), 151.7 (C-2), 140.0 (C-13), 135.6 (C-5), 135.4 (C-7), 133.4, 130.1 (2 C), 129.1 (2 C), 129.1 (C-20), 129.0 (2 C), 128.5 (2 C), 128.4 (2 C), 128.2 (2 C), 127.0, 126.5, 116.9 (C-6), 112.3 (C-1), 50.0 (C-3), 37.1 (C-4); IR (NaCl):

$\nu = 3062, 3029, 2921, 2851, 1735, 1244, 1081, 1063, 705$ ; HR-MS (ES-TOF):  $m/z$ : calcd for  $C_{25}H_{22}O_2NaS$ : 409.1238, found 409.1249 [ $M+Na$ ].

**(Z)-1-(4-Methoxyphenylthio)-3-phenylhexa-1,5-dien-2-yl acetate, 9d**

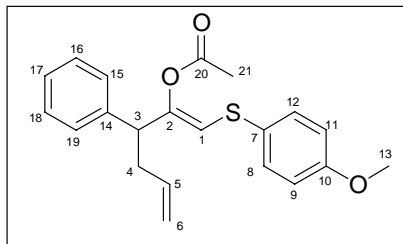

Pale yellow oil;  $^1H$ -NMR (300 MHz,  $CDCl_3$ ):  $\delta = 7.32$ -7.21 (m, 7 H, H-Ar), 6.84 (m, 2 H, H-Ar), 5.85 (s, 1 H, H-1), 5.69 (m, 1 H, H-5), 5.00 (m, 2 H, H-6), 3.79 (s, 3 H, H-13), 3.62 (t,  $J$  7.7, 1 H, H-3), 2.67 (m, 1 H, H-4a), 2.52 (m, 1 H, H-4b), 2.10 (s, 3 H, H-21);  $^{13}C$ -NMR (75 MHz,

$CDCl_3$ ):  $\delta = 167.8$  (C-20), 159.1 (C-10), 149.7 (C-2), 140.0 (C-14), 135.6 (C-5), 132.2 (2 C), 128.4 (2 C), 128.2 (2 C), 127.0, 125.4 (C-7), 116.8 (C-6), 114.7 (2 C), 113.9 (C-1), 55.3 (C-13), 49.7 (C-3), 37.1 (C-4), 20.5 (C-21); IR (NaCl):  $\nu = 3063, 3027, 3003, 2937, 2836, 1758, 1494, 1287, 1247, 1194, 1030, 703$ ; HR-MS (ES-TOF):  $m/z$ : calcd for  $C_{21}H_{22}O_3NaS$ : 377.1187, found 377.1172 [ $M+Na$ ].

**(Z)-3-Phenyl-1-(p-tolylthio)hexa-1,5-dien-2-yl acetate, 9e**

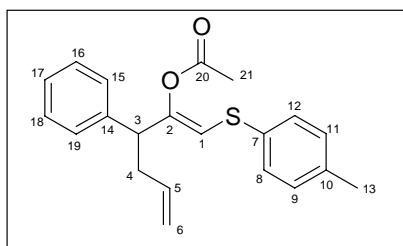

Pale yellow oil;  $^1H$ -NMR (300 MHz,  $CDCl_3$ ):  $\delta = 7.32$ -7.22 (m, 7 H, H-Ar), 7.10 (d,  $J$  8.1, 2 H, H-Ar), 5.91 (s, 1 H, H-1), 5.71 (m, 1 H, H-5), 5.00 (m, 2 H, H-6), 3.65 (t,  $J$  7.6, 1 H, H-3), 2.69 (m, 1 H, H-4a), 2.53 (m, 1 H, H-4b), 2.31 (s, 3 H, H-13), 2.10 (s, 3 H, H-21);  $^{13}C$ -NMR (75

MHz,  $CDCl_3$ ):  $\delta = 167.8$  (C-20), 150.7 (C-2), 140.0 (C-14), 136.8 (C-10), 135.6 (C-5), 131.6 (C-7), 129.7 (4 C), 128.4 (2 C), 128.2 (2 C), 127.0, 116.8 (C-6), 112.8 (C-1), 49.8 (C-3), 37.1 (C-4), 20.8 (C-13), 20.5 (C-21); IR (NaCl):  $\nu = 3062, 3027, 2977, 2921, 2864, 1759, 1493, 1368, 1194, 1133, 1016, 806, 702$ ; HR-MS (ES-TOF):  $m/z$ : calcd for  $C_{21}H_{22}O_2NaS$ : 361.1238, found 361.1247 [ $M+Na$ ].

**(Z)-3-(2-Bromophenyl)-1-(phenylthio)hexa-1,5-dien-2-yl acetate, 9i**

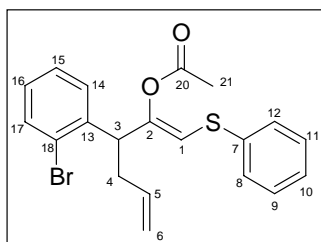

Pale yellow oil;  $^1H$ -NMR (300 MHz,  $CDCl_3$ ):  $\delta = 7.57$  (d,  $J$  8.1, 1 H, H-Ar), 7.37-7.26 (m, 7 H, H-Ar), 7.10 (m, 1 H, H-Ar), 6.05 (s, 1 H, H-1), 5.75 (m, 1 H, H-5), 5.07 (m, 1 H, H-6a), 5.02 (m, 1 H, H-6b), 4.31 (t,  $J$  7.6, 1 H, H-3), 2.71 (m, 1 H, H-4a), 2.55 (m, 1 H, H-4b), 2.12 (s, 3 H, H-21);  $^{13}C$ -NMR (75 MHz,  $CDCl_3$ ):  $\delta =$

$= 167.6$  (C-20), 150.0 (C-2), 139.1 (C-13), 135.2 (C-7), 134.9 (C-5), 133.0, 129.2 (2 C), 129.0 (2 C), 128.8, 128.5, 127.6, 126.6, 125.4 (C-18), 117.2 (C-6),

112.7 (C-1), 48.0 (C-3), 36.6 (C-4), 20.5 (C-21); IR (NaCl):  $\nu$  = 3060, 2922, 2851, 1761, 1479, 1469, 1439, 1368, 1191, 1136, 1024, 740, 690; HR-MS (ES-TOF):  $m/z$ : calcd for  $C_{20}H_{19}BrO_2NaS$ : 425.0187, found 425.0201  $[M+Na]$ .

**(Z)-3-(2-Bromophenyl)-1-(p-tolylthio)hexa-1,5-dien-2-yl acetate, 9j**

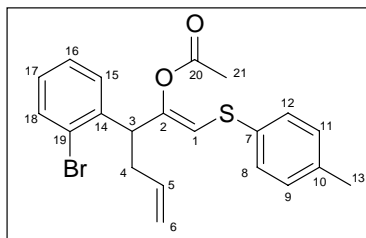

Pale yellow oil;  $^1H$ -NMR (300 MHz,  $CDCl_3$ ):  $\delta$  = 7.56 (d,  $J$  7.8, 1 H, H-Ar), 7.29 (m, 4 H, H-Ar), 7.09 (m, 3 H, H-Ar), 6.01 (s, 1 H, H-1), 5.74 (m, 1 H, H-5), 5.06 (m, 1 H, H-6a), 5.01 (m, 1 H, H-6b), 4.29 (t,  $J$  7.4, 1 H, H-3), 2.68 (m, 1 H, H-4a), 2.55 (m, 1 H, H-4b), 2.33 (s, 3 H, H-13), 2.11 (s, 3 H, H-21);  $^{13}C$ -NMR ( $CDCl_3$ , 75 MHz):  $\delta$  = 167.5 (C-20), 149.1 (C-2), 139.1 (C-14), 136.7 (C-10), 134.9 (C-5), 132.9, 131.4 (C-7), 129.7 (4 C), 128.7, 128.4, 127.5, 125.3 (C-19), 117.1 missing one C (C-6), 113.5 (C-1), 47.9 (C-3), 36.5 (C-4), 20.9 (C-13), 20.4 (C-21); IR (NaCl):  $\nu$  = 3069, 2978, 2920, 1761, 1492, 1469, 1439, 1368, 1193, 1136, 1023, 806, 758, 734; HR-MS (ES-TOF):  $m/z$ : calcd for  $C_{21}H_{21}BrO_2NaS$ : 439.0343, found 439.0352  $[M+Na]$ .

**1-(4-Bromophenylthio)-3-phenylhex-5-en-2-one, 10f**

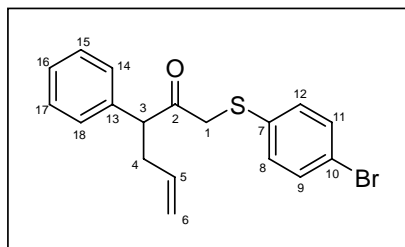

Pale yellow solid;  $^1H$ -NMR (300 MHz,  $CDCl_3$ ):  $\delta$  = 7.34-7.26 (m, 5 H, H-Ar), 7.16 (m, 2 H-Ar), 7.05 (m, 2 H-Ar), 5.59 (m, 1 H, H-5), 4.99 (m, 1 H, H-6a), 4.91 (m, 1 H, H-6b), 4.04 (t,  $J$  7.5, 1 H, H-3), 3.62 (d,  $J$  15.4, 1 H, H-1a), 3.56 (d,  $J$  15.4, 1 H, H-1b), 2.75 (m, 1 H, H-4a), 2.43 (m, 1 H, H-4b);  $^{13}C$ -NMR (75 MHz,  $CDCl_3$ ):  $\delta$  = 203.2 (C-2), 137.5 (C-13), 135.3 (C-5), 133.8 (C-7), 132.0 (2 C), 131.2 (2 C), 129.1 (2 C), 128.4 (2 C), 127.6, 120.7 (C-10), 117.0 (C-6), 56.4 (C-3), 42.9 (C-1), 36.5 (C-4); IR (NaCl):  $\nu$  = 3056, 2893, 1709, 1474, 1092, 1007, 810, 738, 702; MS(EI) 362 ( $M^+$ , 7%), 360 ( $M^+$ , 7%), 203 (9), 201 (9), 172 (7), 131 (100).

**1-(2-Bromophenylthio)-3-phenylhex-5-en-2-one, 10g**

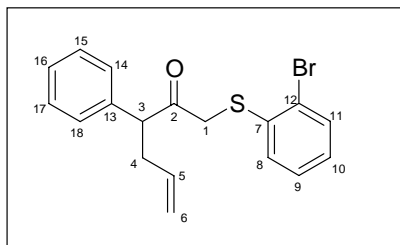

Pale yellow solid;  $^1H$ -NMR (300 MHz,  $CDCl_3$ ):  $\delta$  = 7.51 (dd,  $J$  7.8 and 1.3, 1 H, H-Ar), 7.32-7.16 (m, 5 H, H-Ar), 7.14-7.00 (m, 2 H, H-Ar), 5.58 (m, 1 H, H-5), 4.93 (dd,  $J$  17.1 and 1.3, 1 H, H-6a), 4.89 (dd,  $J$  10.1 and 1.3, 1 H, H-6b), 4.11 (t,  $J$  7.5, 1 H, H-3), 3.69 (d,  $J$  15.5, 1 H, H-1a), 3.63 (d,  $J$  15.5, 1 H, H-1b), 2.75 (m, 1 H, H-4a), 2.44 (m, 1 H, H-4b);  $^{13}C$ -NMR (75 MHz,  $CDCl_3$ ):  $\delta$  = 203.4 (C-2), 137.5 (C-13), 135.9 (C-7), 135.2 (C-5), 133.0, 129.1, 129.0 (2 C),

128.4 (2 C), 127.8, 127.6, 127.4, 123.7 (C-12), 116.9 (C-6), 56.2 (C-3), 41.9 (C-1), 36.4 (C-4); IR (NaCl):  $\nu$  = 3061, 3027, 2977, 2917, 1710, 1450, 1428, 1020, 746, 701; HR-MS (ES-TOF):  $m/z$ : calcd for  $C_{18}H_{17}BrNaOS$ : 383.0081, found 383.0092 [ $M+Na$ ].

### 3-Phenyl-1-(4-(trifluoromethyl)phenylthio)hex-5-en-2-one, 10h

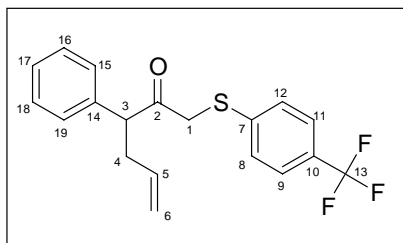

Pale yellow solid;  $^1H$ -NMR (300 MHz,  $CDCl_3$ ):  $\delta$  = 7.42 (d,  $J$  8.4, 2 H, H-Ar), 7.32-7.18 (m, 7 H, H-Ar), 5.58 (m, 1 H, H-5), 4.98 (dd,  $J$  17.1 and 1.4, 1 H, H-6a), 4.92 (d,  $J$  10.4, 1 H, H-6b), 4.06 (t,  $J$  7.4, 1 H, H-3), 3.74 (d,  $J$  15.8, 1 H, H-1a), 3.66 (d,  $J$  15.8, 1 H, H-1b), 2.77 (m, 1 H, H-4a), 2.43 (m, 1 H, H-4b);  $^{13}C$ -NMR (75 MHz,  $CDCl_3$ ):

C-10 and C-13 are not observed  $\delta$  = 203.0 (C-2), 140.2 (C-7), 137.4 (C-14), 135.1 (C-5), 129.1 (2 C), 128.3 (2 C), 127.9 (2 C), 127.7, 125.7 (q,  $J$  2.7, 2 C), 117.0 (C-6), 56.5 (C-3), 41.8 (C-1), 36.5 (C-4); IR (NaCl):  $\nu$  = 3065, 3029, 2923, 2852, 1712, 1606, 1328, 1167, 1125, 1096, 1064, 1013, 701; HR-MS (EI):  $m/z$ : calcd for  $C_{19}H_{17}F_3OS$ : 350.0952, found 350.0968.

### 1-(Allylthio)-3-phenylhex-5-en-2-one, 10k

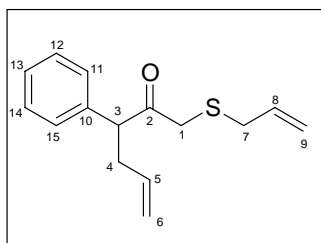

Colourless oil;  $^1H$ -NMR (300 MHz,  $CDCl_3$ ):  $\delta$  = 7.35-7.21 (m, 5 H, H-Ar), 5.67 (m, 2 H, H-5, H-8), 5.01 (m, 4 H, H-6, H-9), 4.08 (t,  $J$  7.5, 1 H, H-3), 3.15 (d,  $J$  14.8, 1 H, H-1a), 3.10 (d,  $J$  14.8, 1 H, H-1b), 3.00 (m, 2 H, H-7), 2.79 (m, 1 H, H-4a), 2.47 (m, 1 H, H-4b);  $^{13}C$ -NMR (75 MHz,  $CDCl_3$ ):  $\delta$  = 203.7 (C-2), 137.9 (C-

10), 135.5, 132.6, 128.9 (2 C), 128.3 (2 C), 127.4, 118.2, 116.7, 56.0 (C-3), 38.4 (C-1), 36.6 (C-4), 34.4 (C-7); IR (NaCl):  $\nu$  = 3079, 3027, 2978, 2917, 1704, 1640, 1493, 1453, 992, 920, 753, 701; HR-MS (ES-TOF):  $m/z$ : calcd for  $C_{15}H_{18}NaOS$ : 269.0976, found 269.0968 [ $M+Na$ ].

### 1-(Phenylthio)-3-phenylhex-5-yn-2-one, 16 / 1-phenyl-3-(phenylthio)hex-5-yn-2-one, 17 (Scheme 6)

Prepared using  $AuCl_3$ ; Isolated as a 1 : 1.6 mixture of isomers **16** : **17**; HPLC separation was performed using a Phenomenex SEMI-PREP Luna 10u C18 column, size 250 mm  $\times$  10 mm, acetonitrile / water = 70 : 30 (3 mL/min).

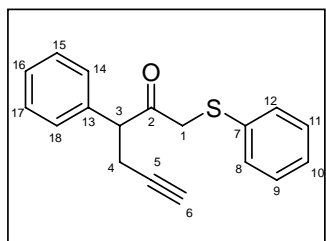

**16**-Colourless solid;  $^1H$ -NMR (300 MHz,  $CDCl_3$ ):  $\delta$  = 7.33-7.16 (m, 10 H, H-Ar), 4.29 (t,  $J$  7.4, 1 H, H-3), 3.65 (d,  $J$  = 15.2, 1 H, H-1a), 3.59 (d,  $J$  15.2, 1 H, H-1b), 2.84 (ddd,  $J$  16.8, 7.4 and 2.6,

1 H, H-4a), 2.54 (ddd,  $J$  16.8, 7.4 and 2.6, 1 H, H-4b), 1.86 (t,  $J$  2.6, 1 H, H-6);  $^{13}\text{C}$ -NMR (75 MHz,  $\text{CDCl}_3$ ):  $\delta$  = 202.7 (C-2), 136.7 (C-13), 134.5 (C-7), 129.9 (2 C), 129.1 (2 C), 129.0 (2 C), 128.3 (2 C), 128.0, 126.9, 81.7 (C-5), 69.8 (C-6), 55.0 (C-3), 42.9 (C-1), 22.0 (C-4); IR (NaCl):  $\nu$  = 3289, 1708, 1482, 1454, 1086, 1069, 750, 670, 632; HR-MS (ES-TOF):  $m/z$ : calcd for  $\text{C}_{18}\text{H}_{16}\text{NaOS}$ : 303.0820, found 303.0809 [ $M+\text{Na}$ ].

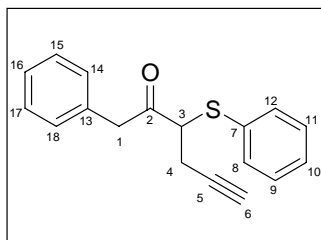

**17**-Colourless oil;  $^1\text{H}$ -NMR (300 MHz,  $\text{CDCl}_3$ ):  $\delta$  = 7.42-7.18 (m, 10 H, H-Ar), 4.01 (d,  $J$  15.4, 1 H, H-1a), 3.95 (d,  $J$  15.4, 1 H, H-1b), 3.83 (dd,  $J$  7.6 and 7.4, 1 H, H-3), 2.63 (ddd,  $J$  17.2, 7.4 and 2.6, 1 H, H-4a), 2.48 (ddd,  $J$  17.2, 7.6 and 2.6, 1 H, H-4b), 2.04 (t,  $J$  2.6, 1 H, H-6);  $^{13}\text{C}$ -NMR (75 MHz,  $\text{CDCl}_3$ ):  $\delta$  = 201.6 (C-2), 134.5 (2 C), 133.6 (C-13), 130.6 (C-7), 129.6 (2 C), 129.2 (2 C), 129.1, 128.7 (2 C), 127.1, 80.7 (C-5), 70.7 (C-6), 53.8 (C-3), 47.5 (C-1), 20.2 (C-4); IR (NaCl):  $\nu$  = 3291, 3061, 3029, 2917, 1712, 1496, 1439, 1341, 1091, 1025, 750, 693, 643; HR-MS (ES-TOF):  $m/z$ : calcd for  $\text{C}_{18}\text{H}_{16}\text{NaOS}$ : 303.0820, found 303.0810 [ $M+\text{Na}$ ].

#### (Z)-1-(4-Allyl-2,3-dihydrothiophen-2-yl)-2-phenylvinyl pivalate, **19** (Scheme 7)

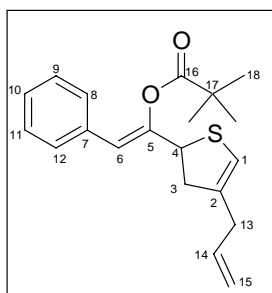

Colourless solid;  $^1\text{H}$ -NMR (300 MHz,  $\text{CDCl}_3$ ):  $\delta$  = 7.35-7.20 (m, 5 H, H-Ar), 6.33 (br s, 1 H, H-6), 5.82 (m, 1 H, H-14), 5.74 (br s, 1 H, H-1), 5.10 (m, 2 H, H-15), 4.59 (dd,  $J$  8.6 and 7.9, 1 H, H-4), 2.85 (m, 4 H, H-3, H-13), 1.25 (s, 9 H, H-18);  $^{13}\text{C}$ -NMR (75 MHz,  $\text{CDCl}_3$ ):  $\delta$  = 175.7 (C-16), 147.9 (C-5), 135.1 (C-14), 133.9 (C-7), 133.4 (C-2), 128.5 (2 C), 128.1 (2 C), 127.4 (C-10), 117.9 (C-1), 116.9 (C-6), 116.6 (C-15), 51.7 (C-4), 41.9 (C-3), 39.1 (C-17), 36.0 (C-13), 27.1 (C-18); IR (NaCl):  $\nu$  = 3057, 3027, 2976, 2933, 1745, 1480, 1112, 1030, 920, 739, 699; HR-MS (ES-TOF):  $m/z$ : calcd for  $\text{C}_{20}\text{H}_{24}\text{NaO}_2\text{S}$ : 351.1395, found 351.1400 [ $M+\text{Na}$ ].

## References

- <sup>1</sup> N. Ono, H. Miyake, T. Saito, A. Kaji, *Synthesis* 1980, 952.
- <sup>2</sup> M. Piffl, J. Weston, W. Günter, *J. Org. Chem.* 2000, **65**, 5942.
- <sup>3</sup> X. Rathgeb, S. March, A. Alexakis, *J. Org. Chem.* 2006, **71**, 5737.
- <sup>4</sup> J. Ham, I. Yang, H. Kang, *J. Org. Chem.* 2004, **69**, 3236.
- <sup>5</sup> X. Arnau, M. Moreno-Mañas, R. Pleixats, *Tetrahedron* 1993, **49**, 11019.
- <sup>6</sup> A. Linden, L. Krueger, J.-E. Bäckvall, *J. Org. Chem.* 2003, **68**, 5890.

### NMR Comparison Tables

| Compounds                                                                           | Resonance (ppm) for assigned protons and carbons |            |              |                   |               |                    |            |            |
|-------------------------------------------------------------------------------------|--------------------------------------------------|------------|--------------|-------------------|---------------|--------------------|------------|------------|
|                                                                                     | 1                                                | 2          | 3            | 4                 | 5             | 6                  | C(Ph)      | C(SPh)     |
| 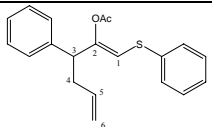   | 5.95<br>111.9                                    | -<br>151.6 | 3.67<br>49.8 | 2.71/2.54<br>37.1 | 5.72<br>135.6 | 5.05/5.00<br>116.9 | -<br>139.9 | -<br>135.3 |
|    | 5.96<br>111.8                                    | -<br>151.5 | 3.69<br>49.7 | 2.71/2.54<br>37.1 | 5.72<br>135.7 | 5.04/4.99<br>116.8 | -<br>140.1 | -<br>135.7 |
|    | 5.86<br>113.9                                    | -<br>149.7 | 3.62<br>49.7 | 2.69/2.51<br>37.1 | 5.69<br>135.6 | 5.02/4.97<br>116.8 | -<br>140.0 | -<br>125.4 |
|   | 5.91<br>112.8                                    | -<br>150.7 | 3.65<br>49.8 | 2.69/2.50<br>37.1 | 5.72<br>135.6 | 5.03/4.98<br>116.8 | -<br>140.0 | -<br>131.6 |
|  | 6.05<br>112.7                                    | -<br>150.0 | 4.31<br>48.0 | 2.71/2.56<br>36.6 | 5.74<br>134.9 | 5.07/5.02<br>117.2 | -<br>139.1 | -<br>135.2 |
|  | 6.01<br>113.5                                    | -<br>149.1 | 4.29<br>47.9 | 2.68/2.55<br>36.5 | 5.74<br>134.9 | 5.06/5.01<br>117.1 | -<br>139.1 | -<br>131.4 |

| Compounds                                                                          | Resonance (ppm) for assigned protons and carbons |            |              |                   |                        |                        |            |            |
|------------------------------------------------------------------------------------|--------------------------------------------------|------------|--------------|-------------------|------------------------|------------------------|------------|------------|
|                                                                                    | 1                                                | 2          | 3            | 4                 | 5                      | 6                      | C(Ph)      | C(SPh)     |
| 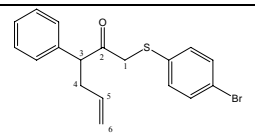  | 3.63/3.57<br>42.9                                | -<br>203.2 | 4.04<br>56.4 | 2.75/2.43<br>36.5 | 5.59<br>135.3          | 4.99/4.91<br>117.0     | -<br>137.5 | -<br>133.8 |
|   | 3.74/3.66<br>41.8                                | -<br>203.4 | 4.06<br>56.5 | 2.77/2.43<br>36.5 | 5.58<br>135.1          | 4.98/4.92<br>117.0     | -<br>137.4 | -<br>140.2 |
|   | 3.69/3.63<br>41.9                                | -<br>203.0 | 4.11<br>56.2 | 2.75/2.44<br>36.4 | 5.58<br>135.2          | 4.97/4.90<br>116.9     | -<br>137.5 | -<br>135.9 |
|  | 3.15/3.10<br>38.4                                | -<br>203.7 | 4.08<br>56.0 | 2.79/2.47<br>36.6 | 5.67<br>135.5<br>132.6 | 5.01<br>118.2<br>116.7 | -<br>137.9 | -<br>-     |



## HPLC data (Scheme 5)

### (R)-1-phenylprop-2-ynyl benzoate, (R)-6

Operator: Timebase:HPLC1\_1 Sequence:manual

Page 786-1  
30/8/07 9:30 AM

#### 786 SA 123 (5% IPA in Hexane)

|                  |                           |                   |          |
|------------------|---------------------------|-------------------|----------|
| Sample Name:     | SA 123 (5% IPA in Hexane) | Injection Volume: | 20.0     |
| Vial Number:     | 1                         | Channel:          | UV_VIS_1 |
| Sample Type:     | unknown                   | Wavelength:       | 210      |
| Control Program: |                           | Bandwidth:        | 1        |
| Quantif. Method: | default                   | Dilution Factor:  | 1.0000   |
| Recording Time:  | 30/8/07 8:37              | Sample Weight:    | 1.0000   |
| Run Time (min):  | 12.61                     | Sample Amount:    | 1.0000   |

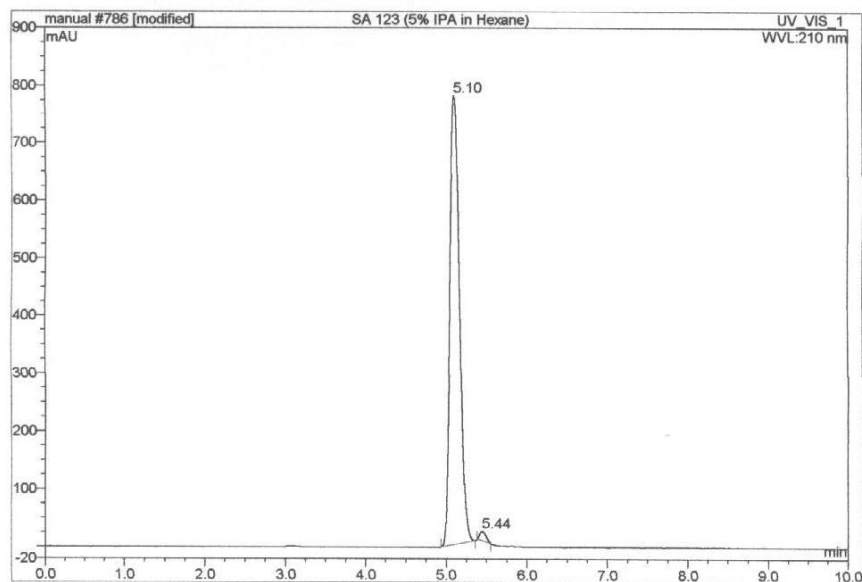

| No.    | Ret.Time<br>min | Peak Name | Height<br>mAU | Area<br>mAU*min | Rel.Area<br>% | Amount | Type |
|--------|-----------------|-----------|---------------|-----------------|---------------|--------|------|
| 1      | 5.10            | n.a.      | 779.037       | 106.997         | 98.66         | n.a.   | BMB  |
| 2      | 5.44            | n.a.      | 15.490        | 1.450           | 1.34          | n.a.   | BMB* |
| Total: |                 |           | 794.527       | 108.447         | 100.00        | 0.000  |      |

**(Z)-1-(4-methoxyphenylthio)-3-phenylhexa-1,5-dien-2-yl acetate, 9c [from (R)-6]**

Operator: Timebase:HPLC1\_1 Sequence:manual

Page 788-1  
30/8/07 9:56 AM

**788 SA 124 (5% IPA in Hexane)**

|                  |                           |                   |          |
|------------------|---------------------------|-------------------|----------|
| Sample Name:     | SA 124 (5% IPA in Hexane) | Injection Volume: | 20.0     |
| Vial Number:     | 1                         | Channel:          | UV_VIS_1 |
| Sample Type:     | unknown                   | Wavelength:       | 210      |
| Control Program: |                           | Bandwidth:        | 1        |
| Quantif. Method: | default                   | Dilution Factor:  | 1.0000   |
| Recording Time:  | 30/8/07 9:12              | Sample Weight:    | 1.0000   |
| Run Time (min):  | 16.47                     | Sample Amount:    | 1.0000   |

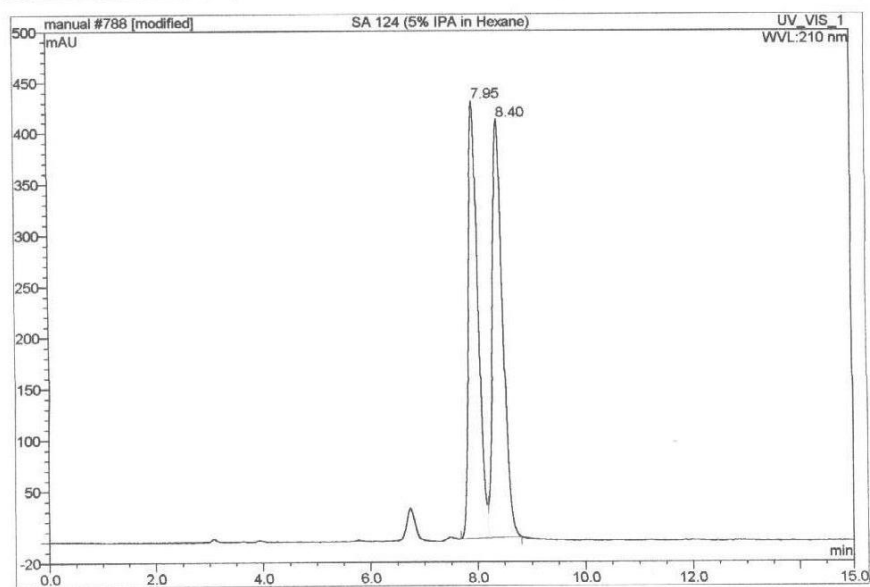

| No.           | Ret.Time<br>min | Peak Name | Height<br>mAU | Area<br>mAU*min | Rel.Area<br>% | Amount | Type |
|---------------|-----------------|-----------|---------------|-----------------|---------------|--------|------|
| 1             | 7.95            | n.a.      | 428.079       | 87.804          | 49.03         | n.a.   | BM   |
| 2             | 8.40            | n.a.      | 408.928       | 91.296          | 50.97         | n.a.   | MB   |
| <b>Total:</b> |                 |           | 837.007       | 179.100         | 100.00        | 0.000  |      |

relarea/Integration

Chromeleon (c) Dionex 1999  
Version 6.11 Build 490

**(Z)-1-(4-methoxyphenylthio)-3-phenylhexa-1,5-dien-2-yl acetate, 9c [From racemic 6]**

Operator: Timebase:HPLC1\_1 Sequence:manual

Page 787-1  
30/8/07 9:54 AM

**787 SA 39 T3 (5% IPA in Hexane)**

|                  |                             |                   |          |
|------------------|-----------------------------|-------------------|----------|
| Sample Name:     | SA 39 T3 (5% IPA in Hexane) | Injection Volume: | 20.0     |
| Vial Number:     | 1                           | Channel:          | UV_VIS_1 |
| Sample Type:     | unknown                     | Wavelength:       | 210      |
| Control Program: |                             | Bandwidth:        | 1        |
| Quantif. Method: | default                     | Dilution Factor:  | 1.0000   |
| Recording Time:  | 30/8/07 8:51                | Sample Weight:    | 1.0000   |
| Run Time (min):  | 17.66                       | Sample Amount:    | 1.0000   |

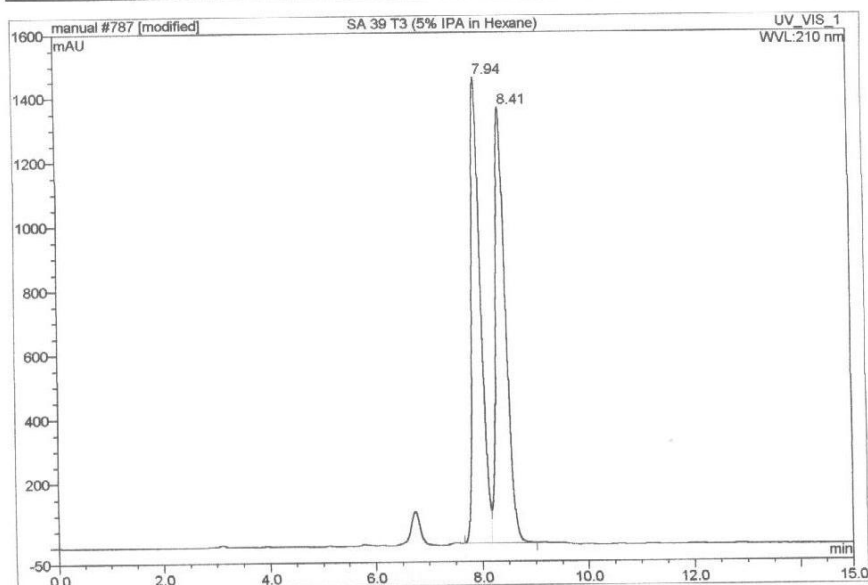

| No.           | Ret.Time<br>min | Peak Name | Height<br>mAU | Area<br>mAU*min | Rel.Area<br>% | Amount | Type |
|---------------|-----------------|-----------|---------------|-----------------|---------------|--------|------|
| 1             | 7.94            | n.a.      | 1453.993      | 288.367         | 49.07         | n.a.   | BM   |
| 2             | 8.41            | n.a.      | 1356.902      | 299.324         | 50.93         | n.a.   | MB   |
| <b>Total:</b> |                 |           | 2810.895      | 587.690         | 100.00        | 0.000  |      |

relarea/Integration

Chromeleon (c) Dionex 1999  
Version 6.11 Build 490

# NMR Spectra

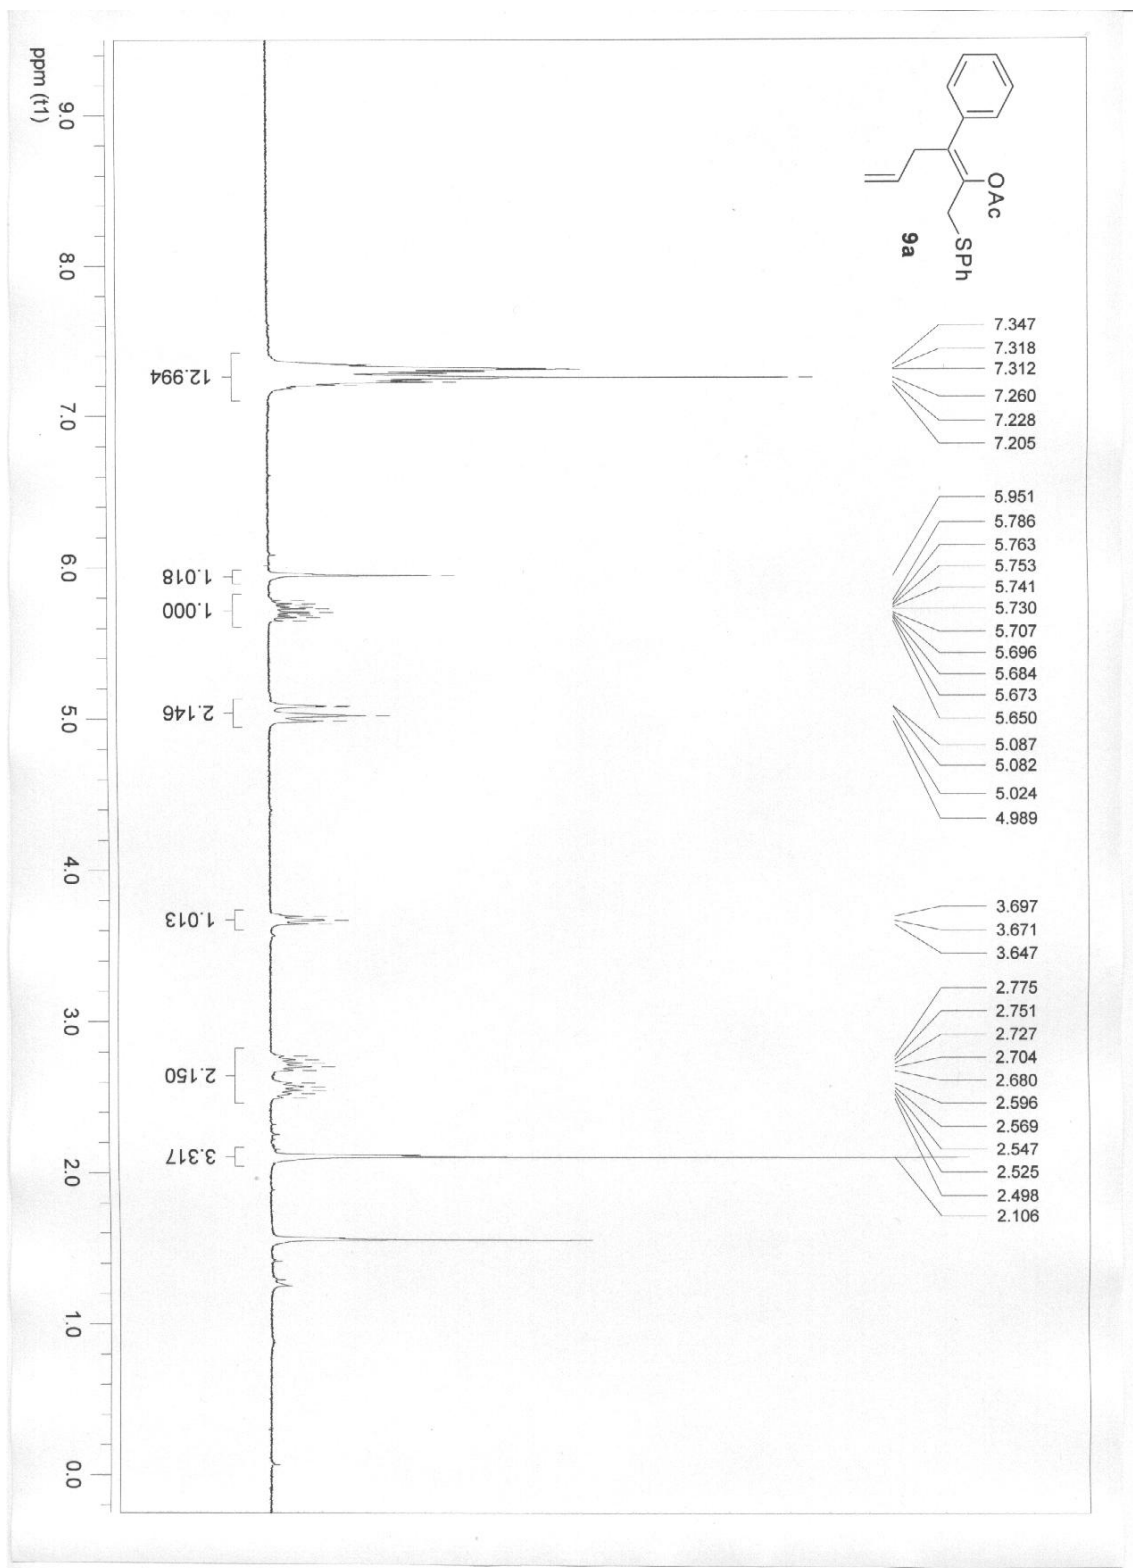

<sup>1</sup>H-NMR (300 MHz, CDCl<sub>3</sub>) of **9a**

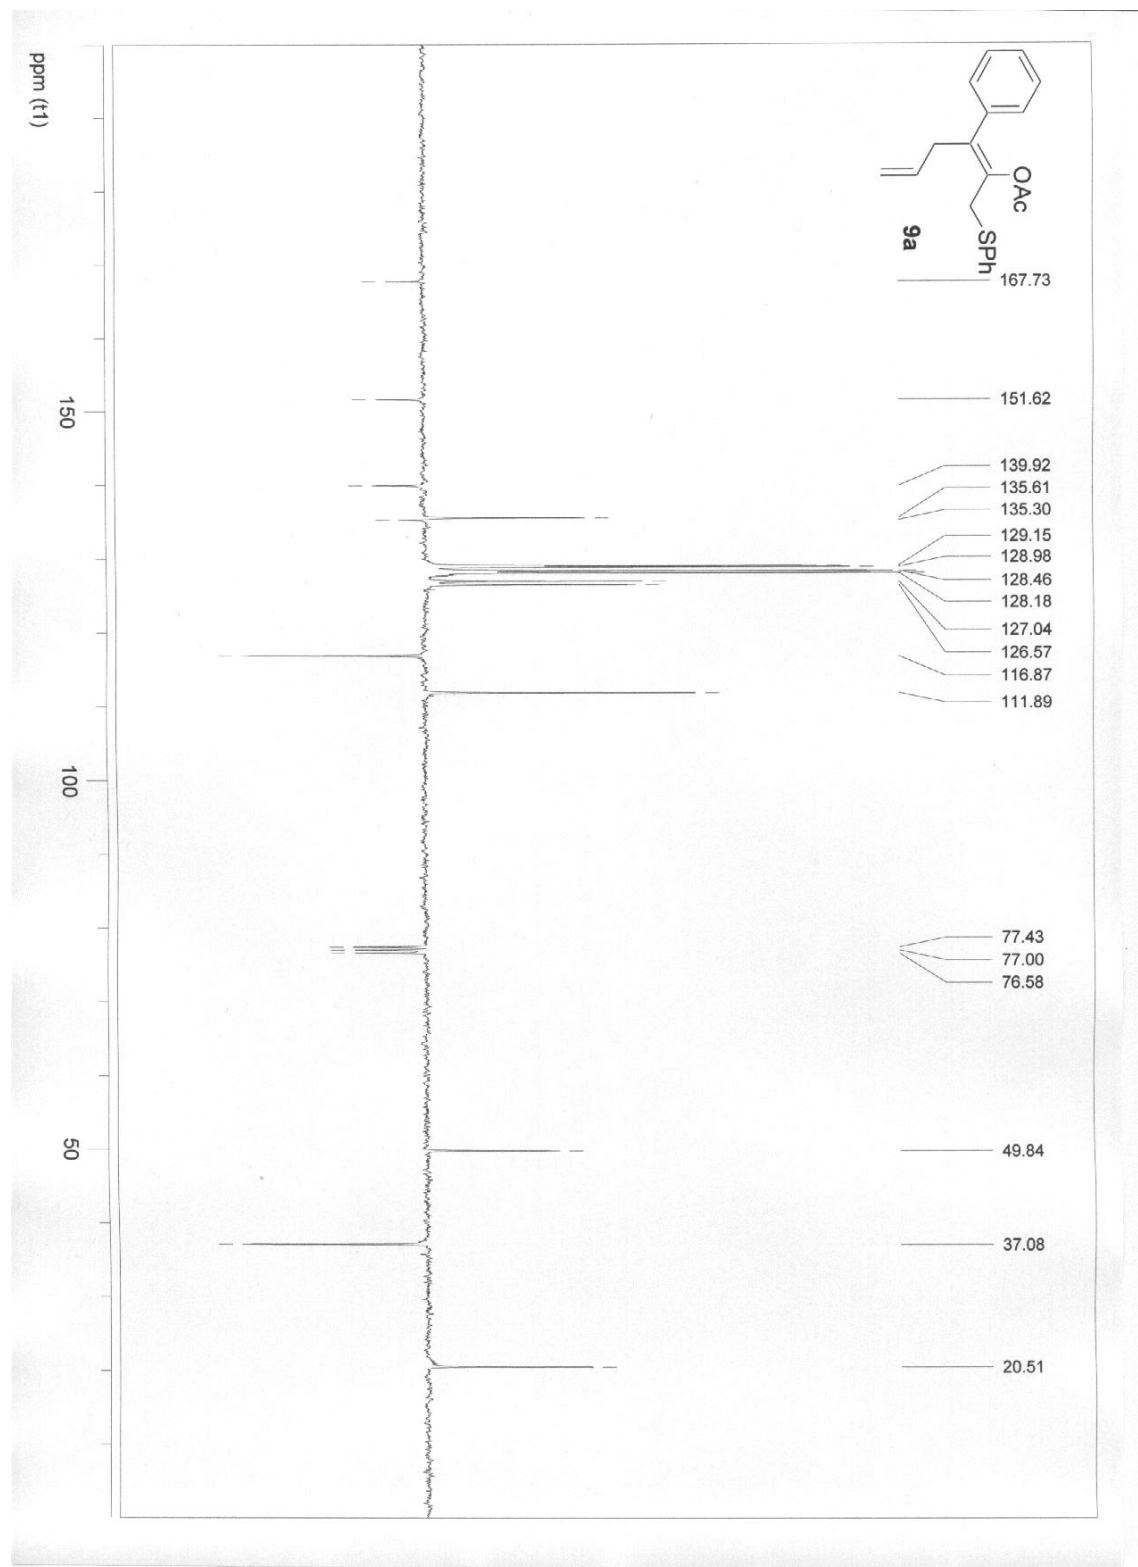

<sup>13</sup>C-NMR (75 MHz, CDCl<sub>3</sub>) of **9a**

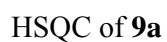

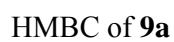

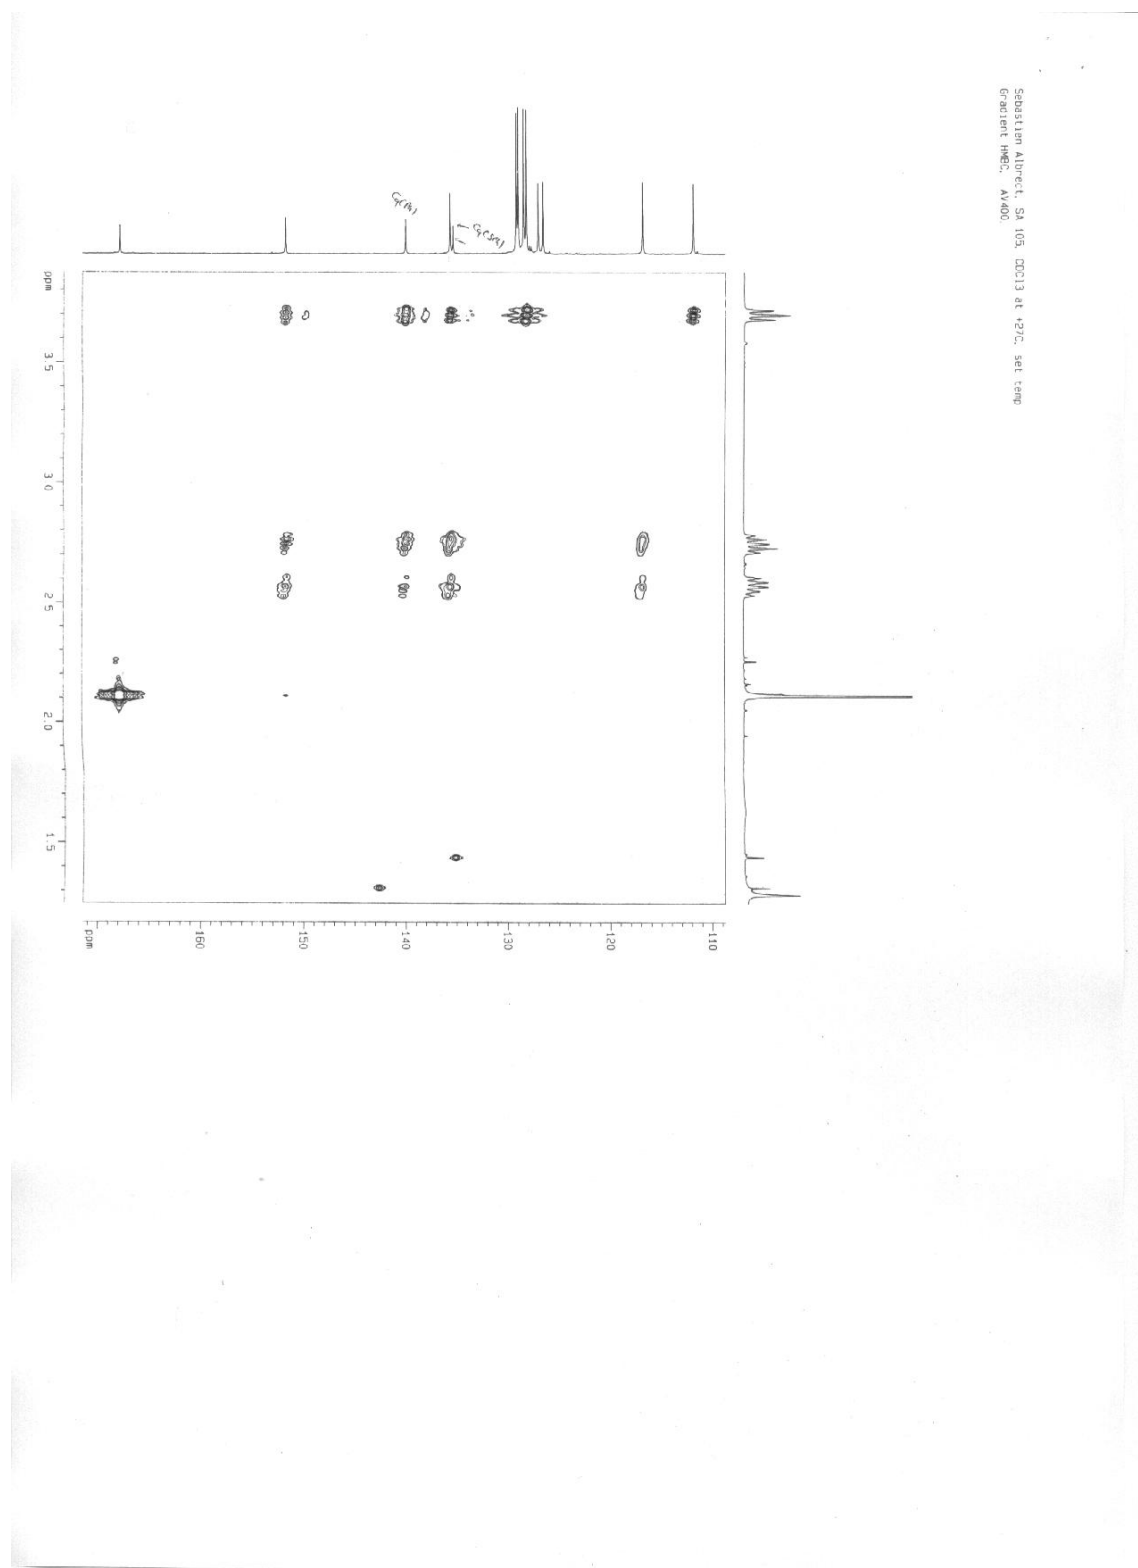

HMBC of **9a**



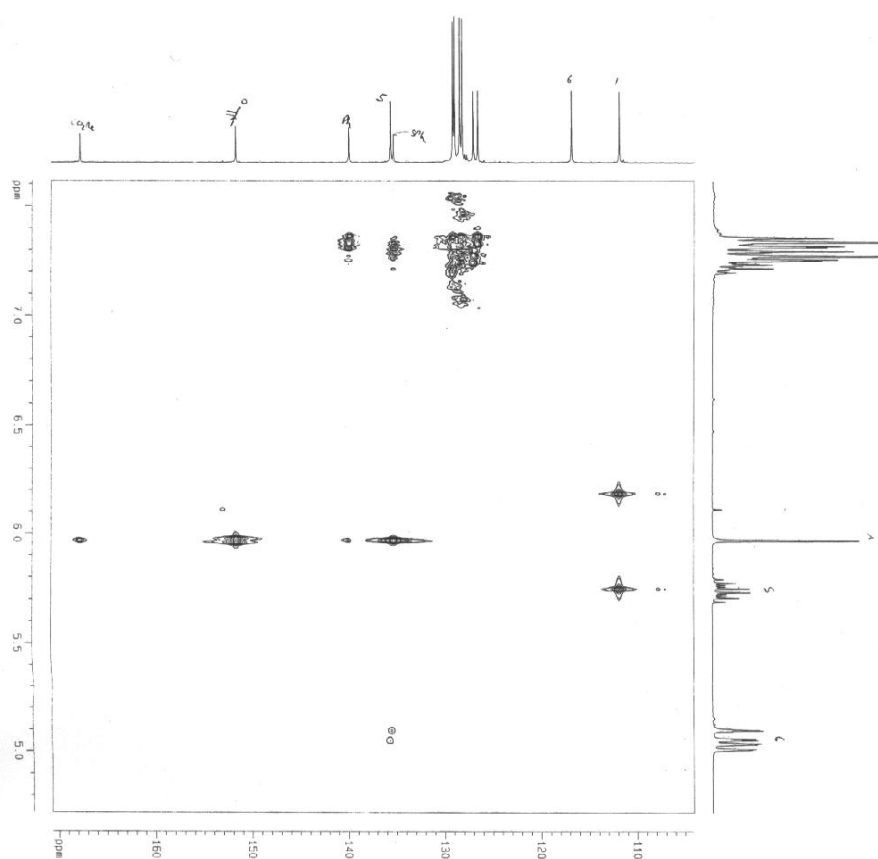

HMBC of **9a**

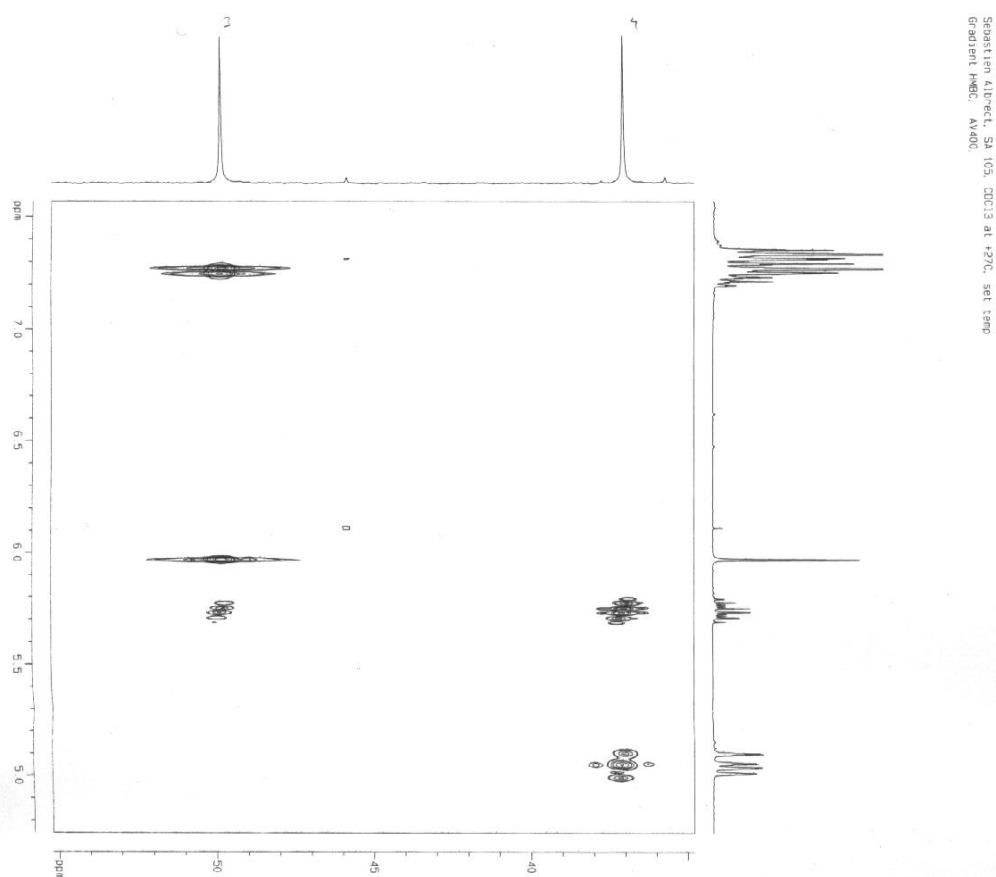

HMBC of **9a**

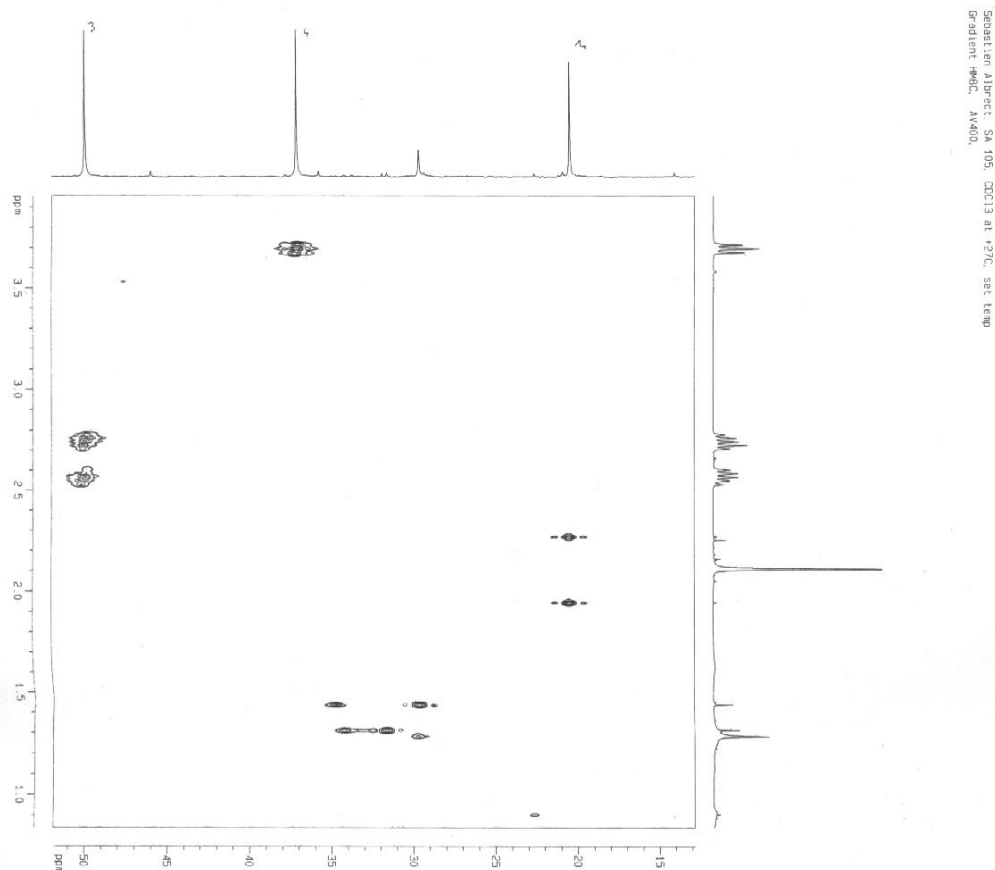

HMBC of **9a**

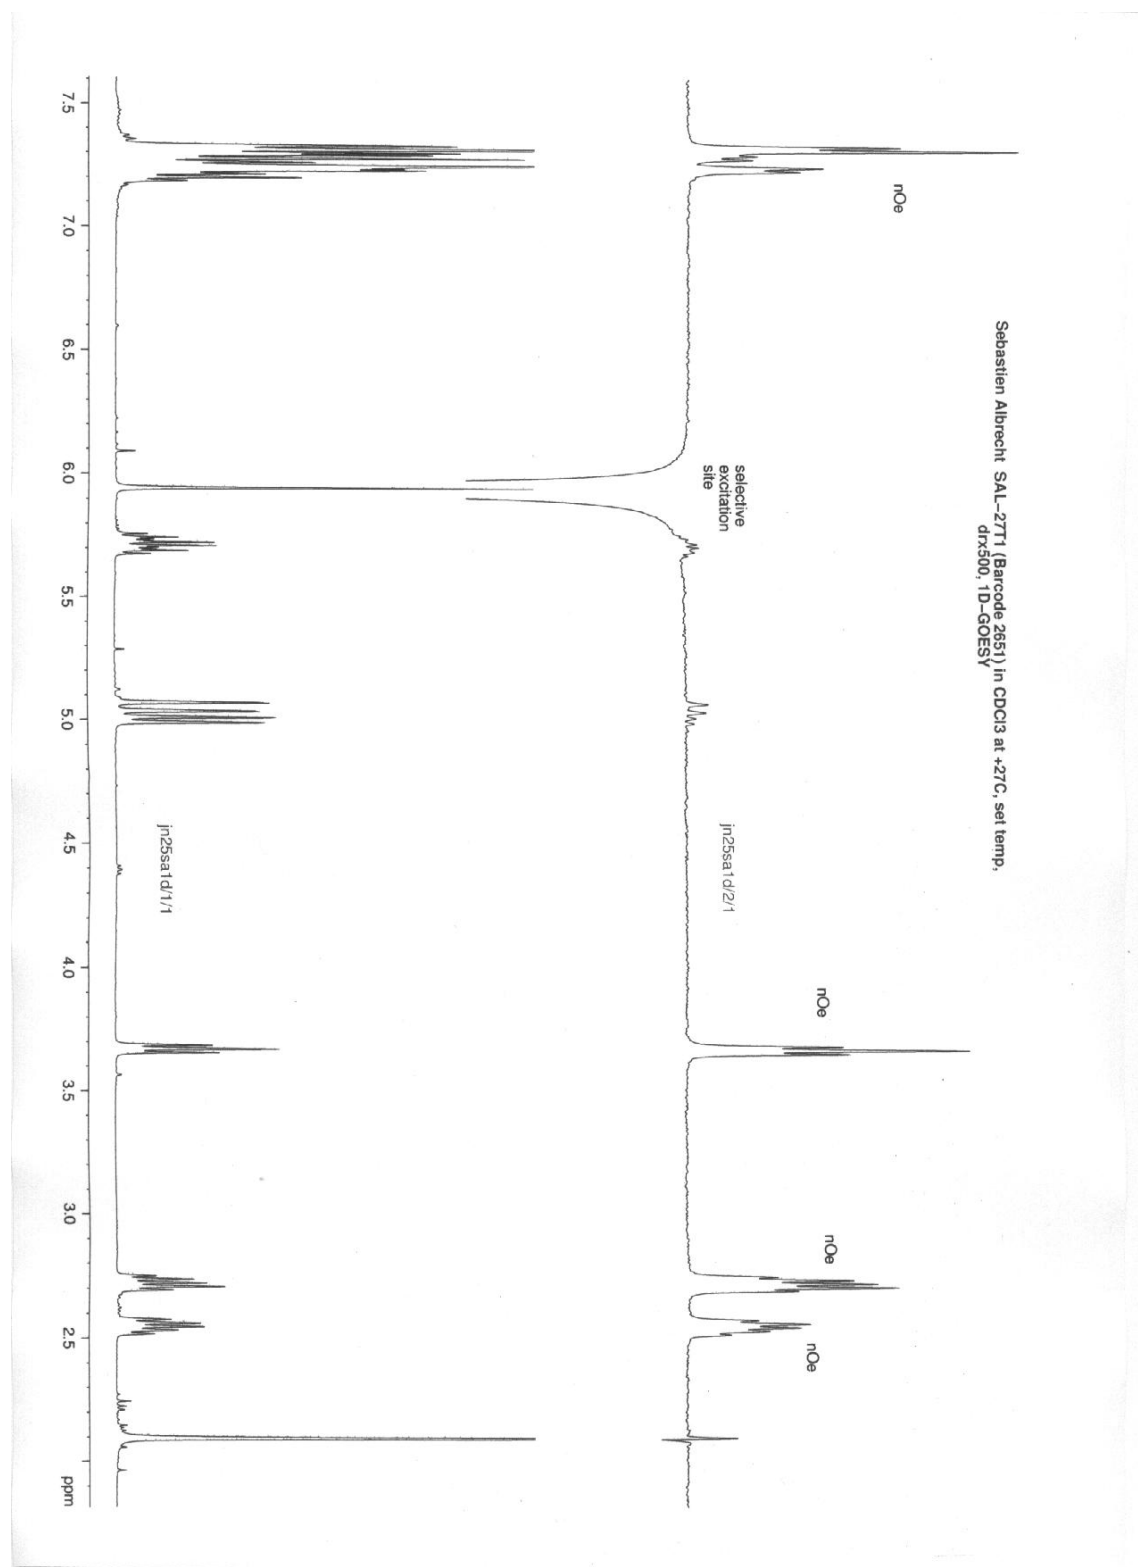NOE of **9a**

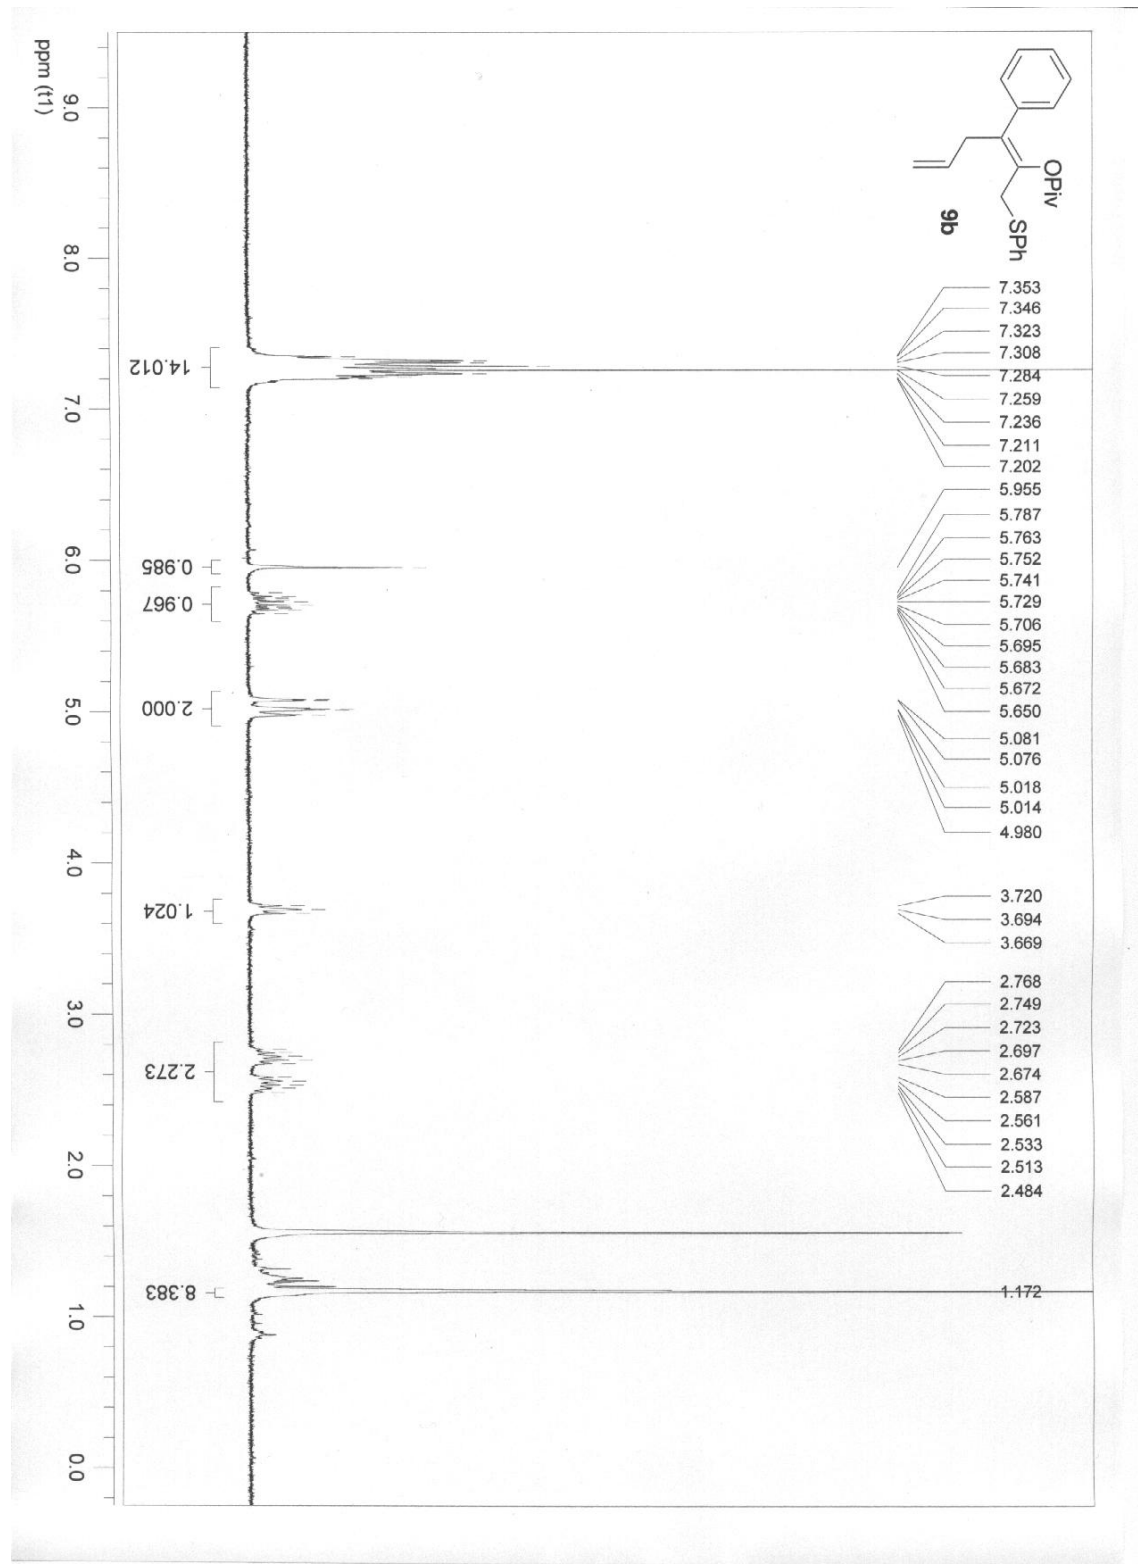

<sup>1</sup>H-NMR (300 MHz, CDCl<sub>3</sub>) of **9b**

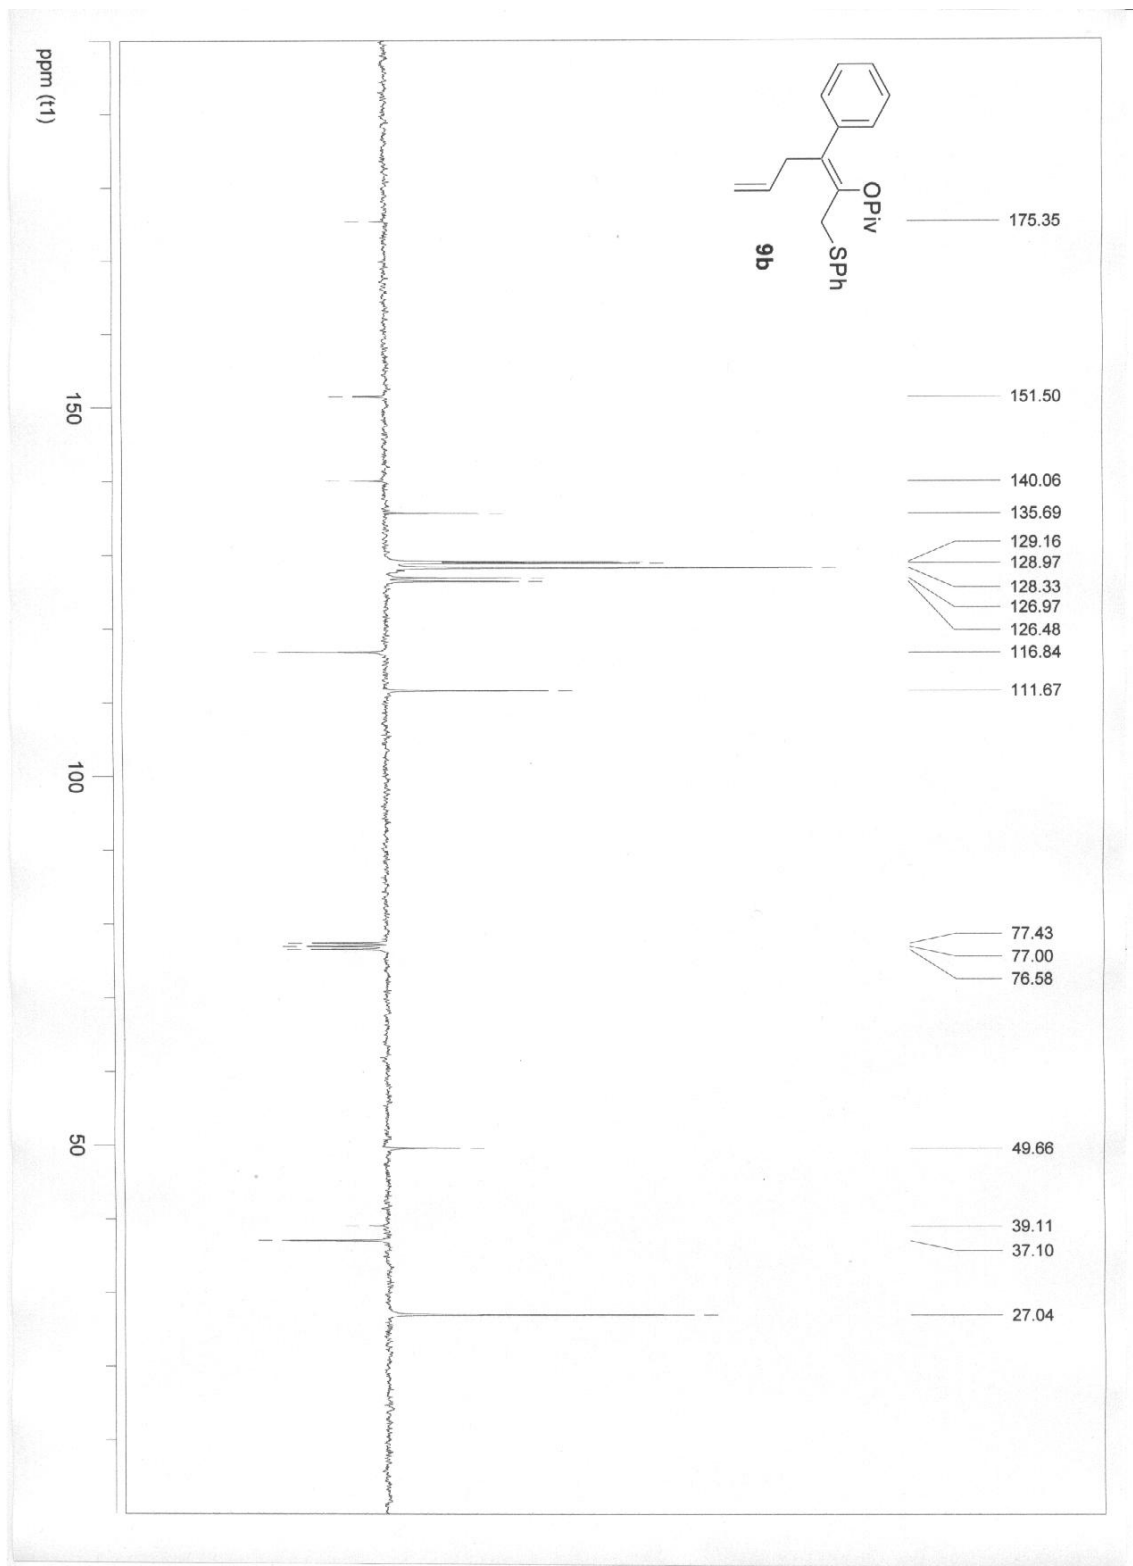

$^{13}\text{C}$ -NMR (75 MHz,  $\text{CDCl}_3$ ) of **9b**

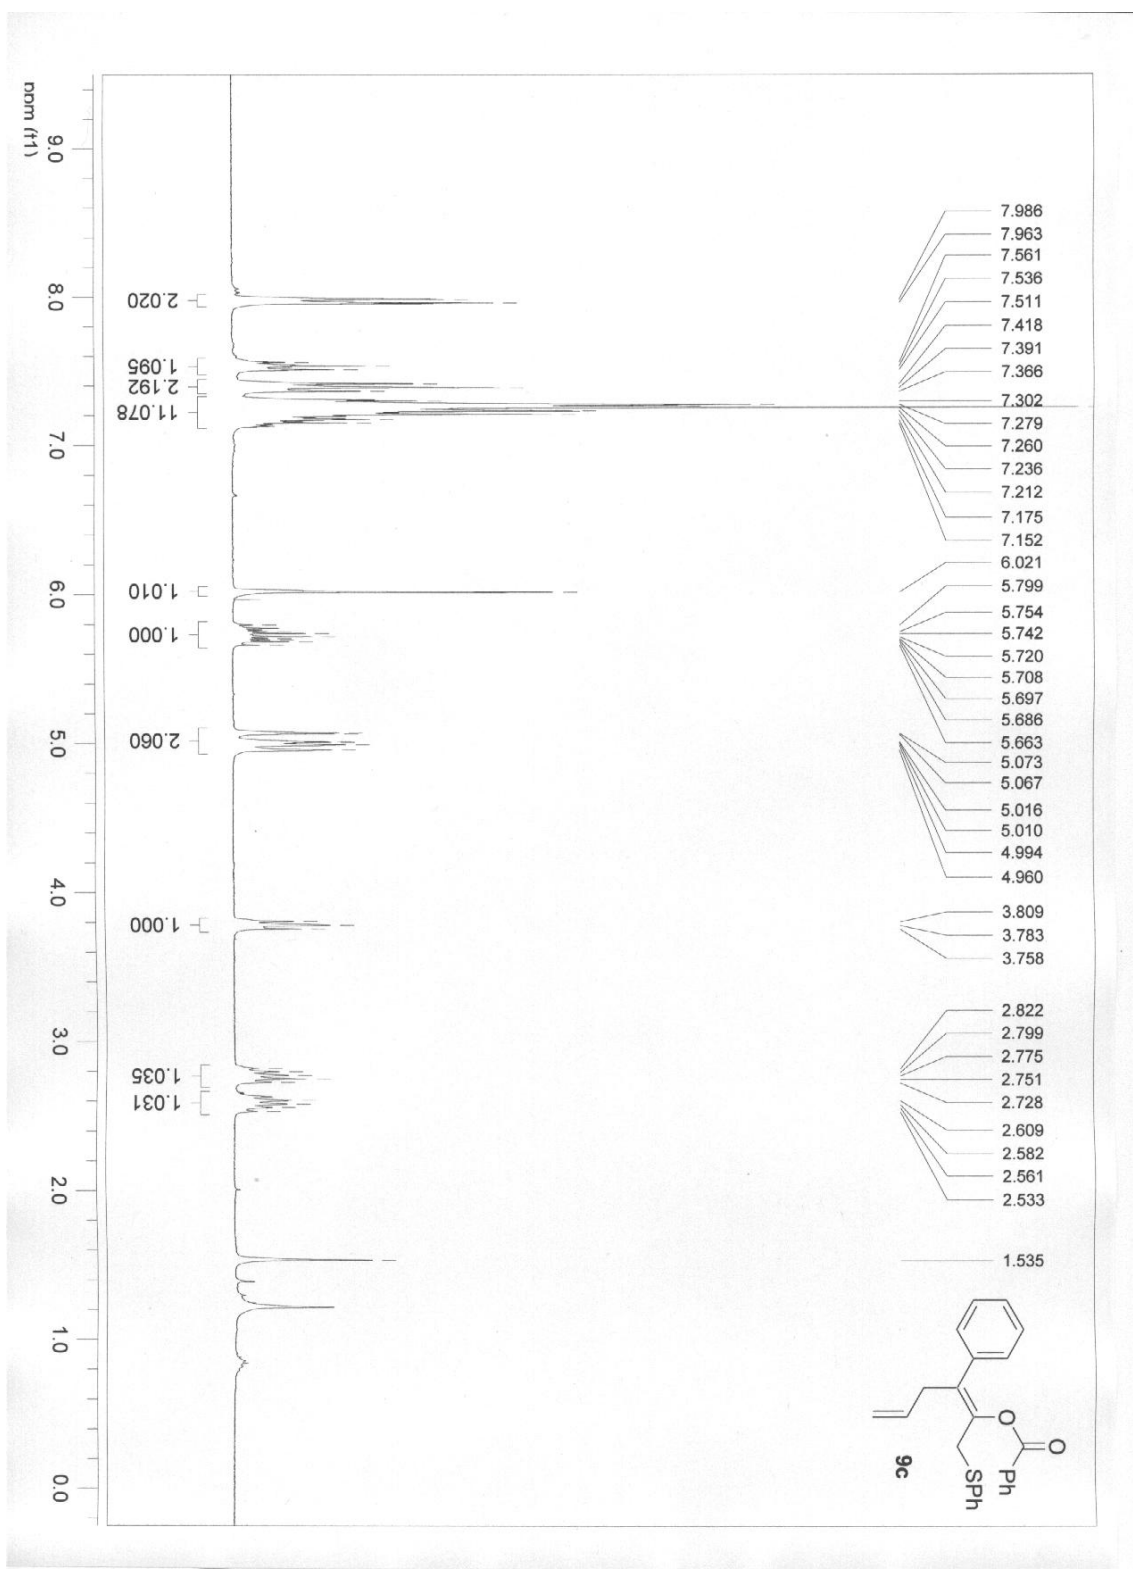

<sup>1</sup>H-NMR (300 MHz, CDCl<sub>3</sub>) of **9c**

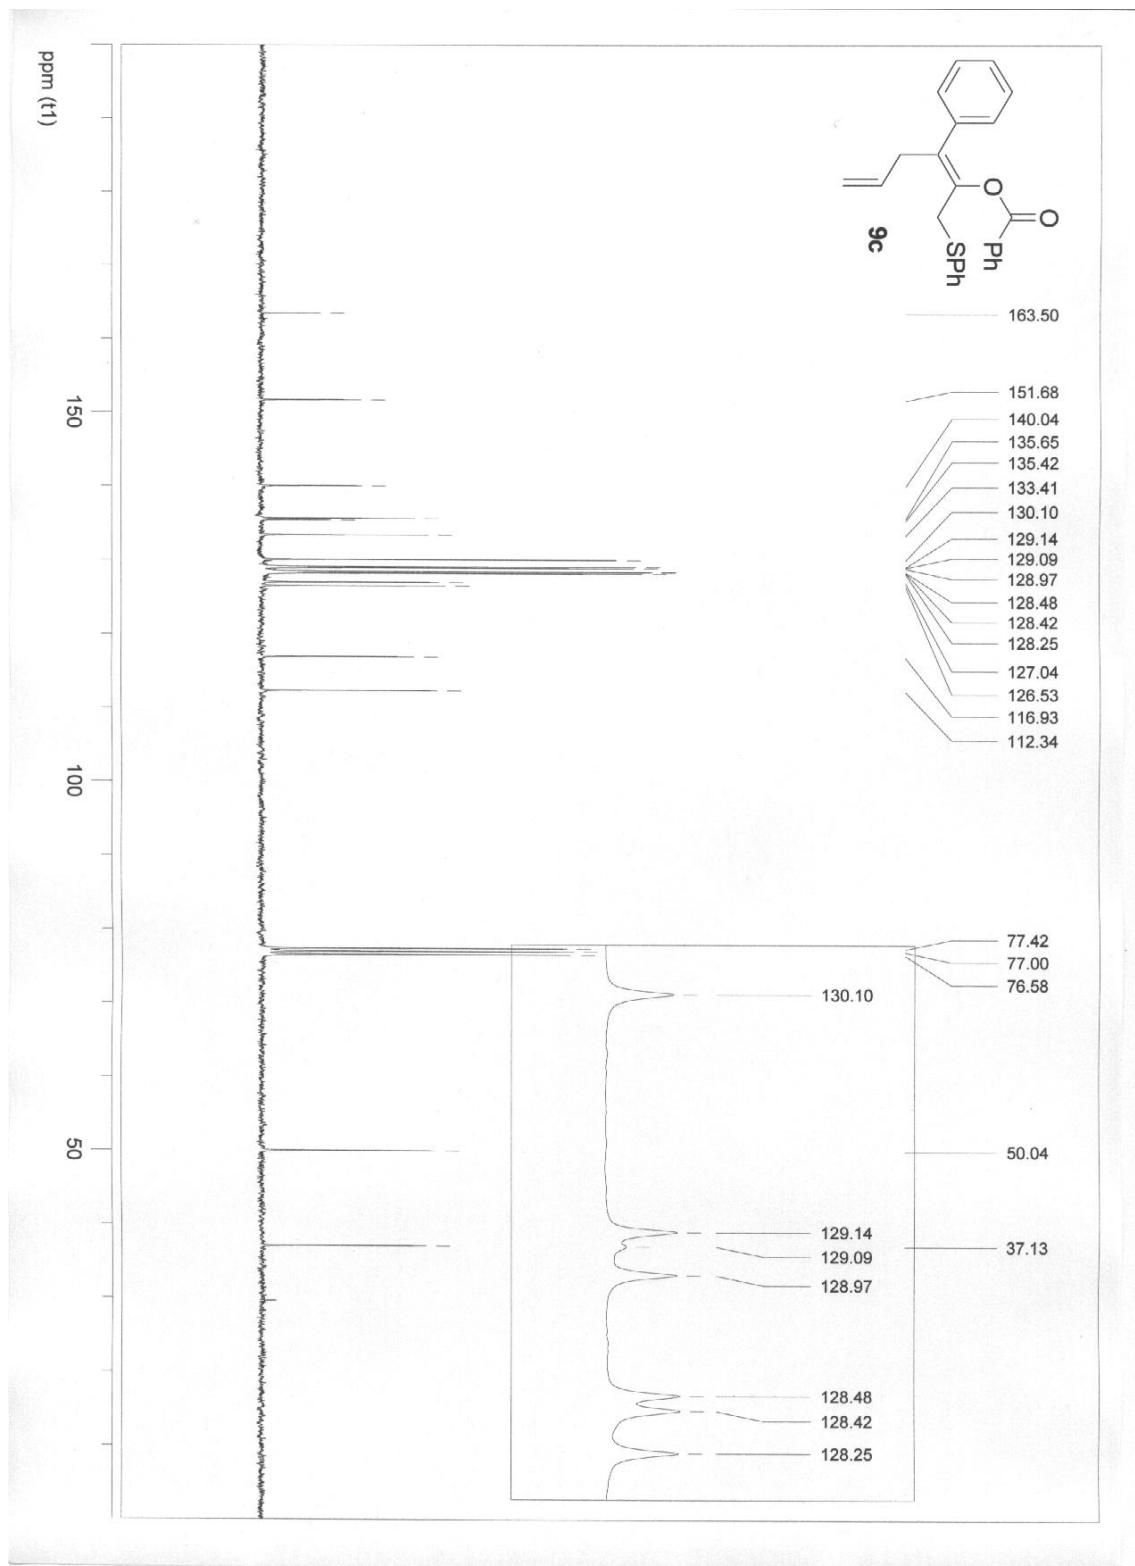

<sup>13</sup>C-NMR (75 MHz, CDCl<sub>3</sub>) of **9c**



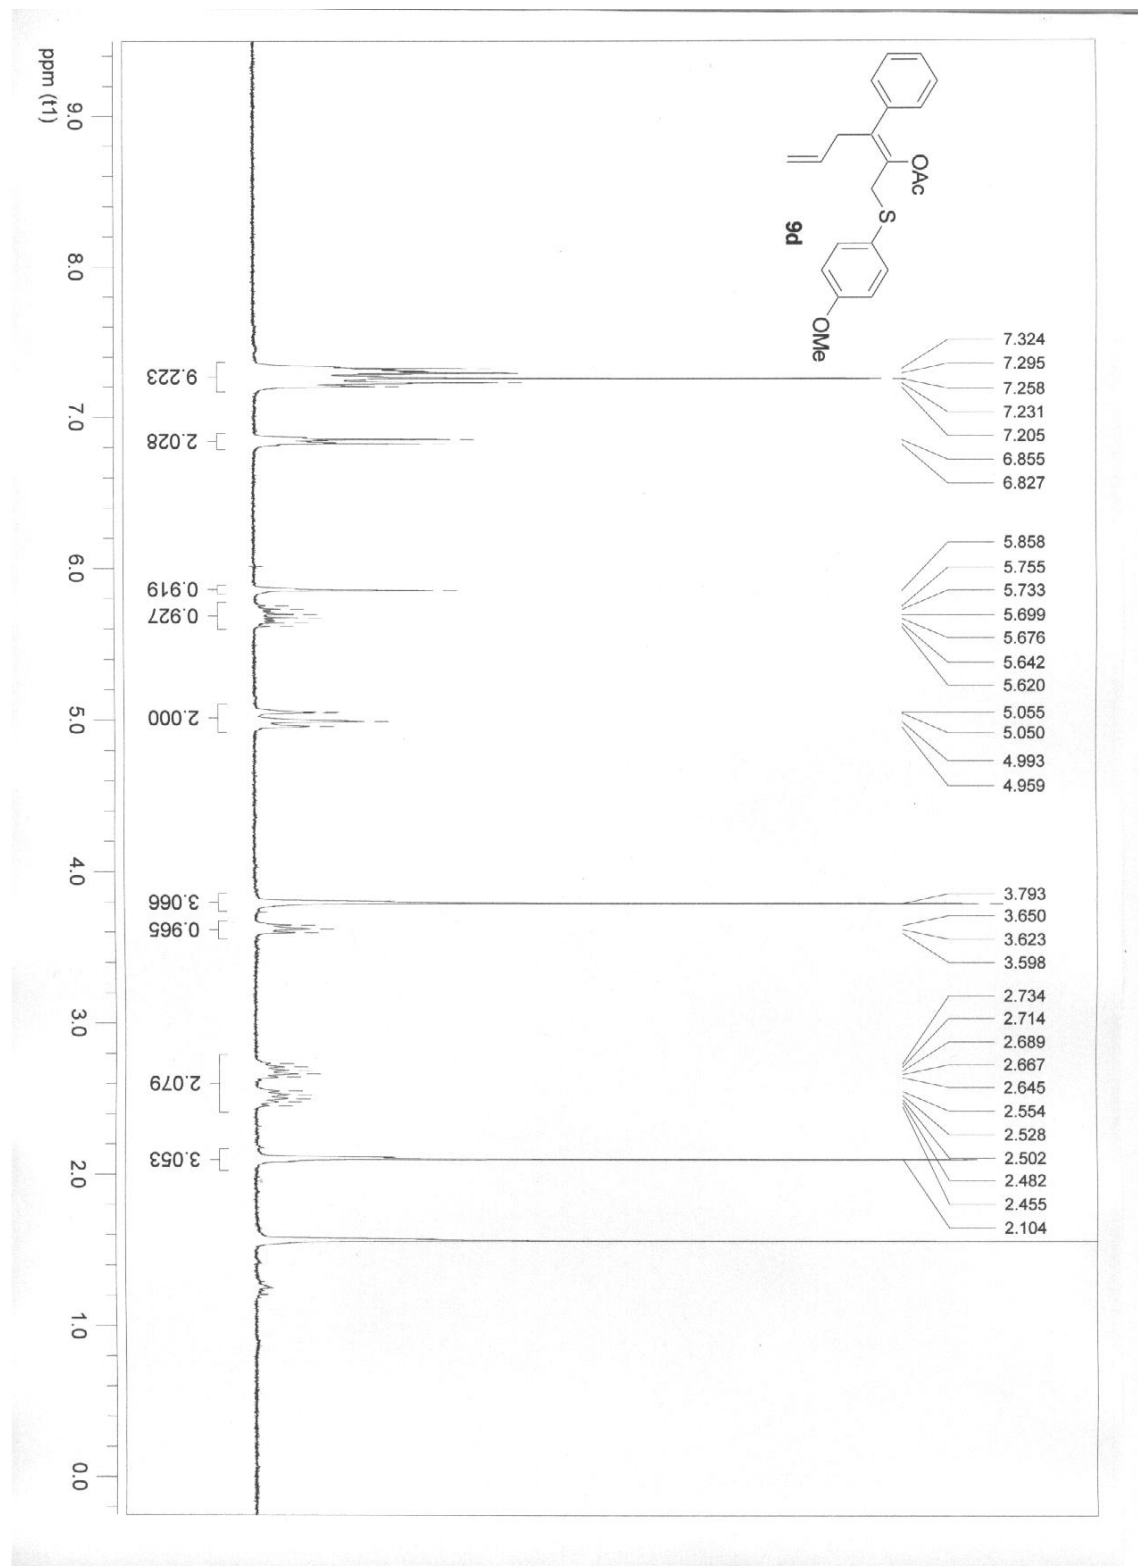

$^1\text{H}$ -NMR (300 MHz,  $\text{CDCl}_3$ ) of **9d**

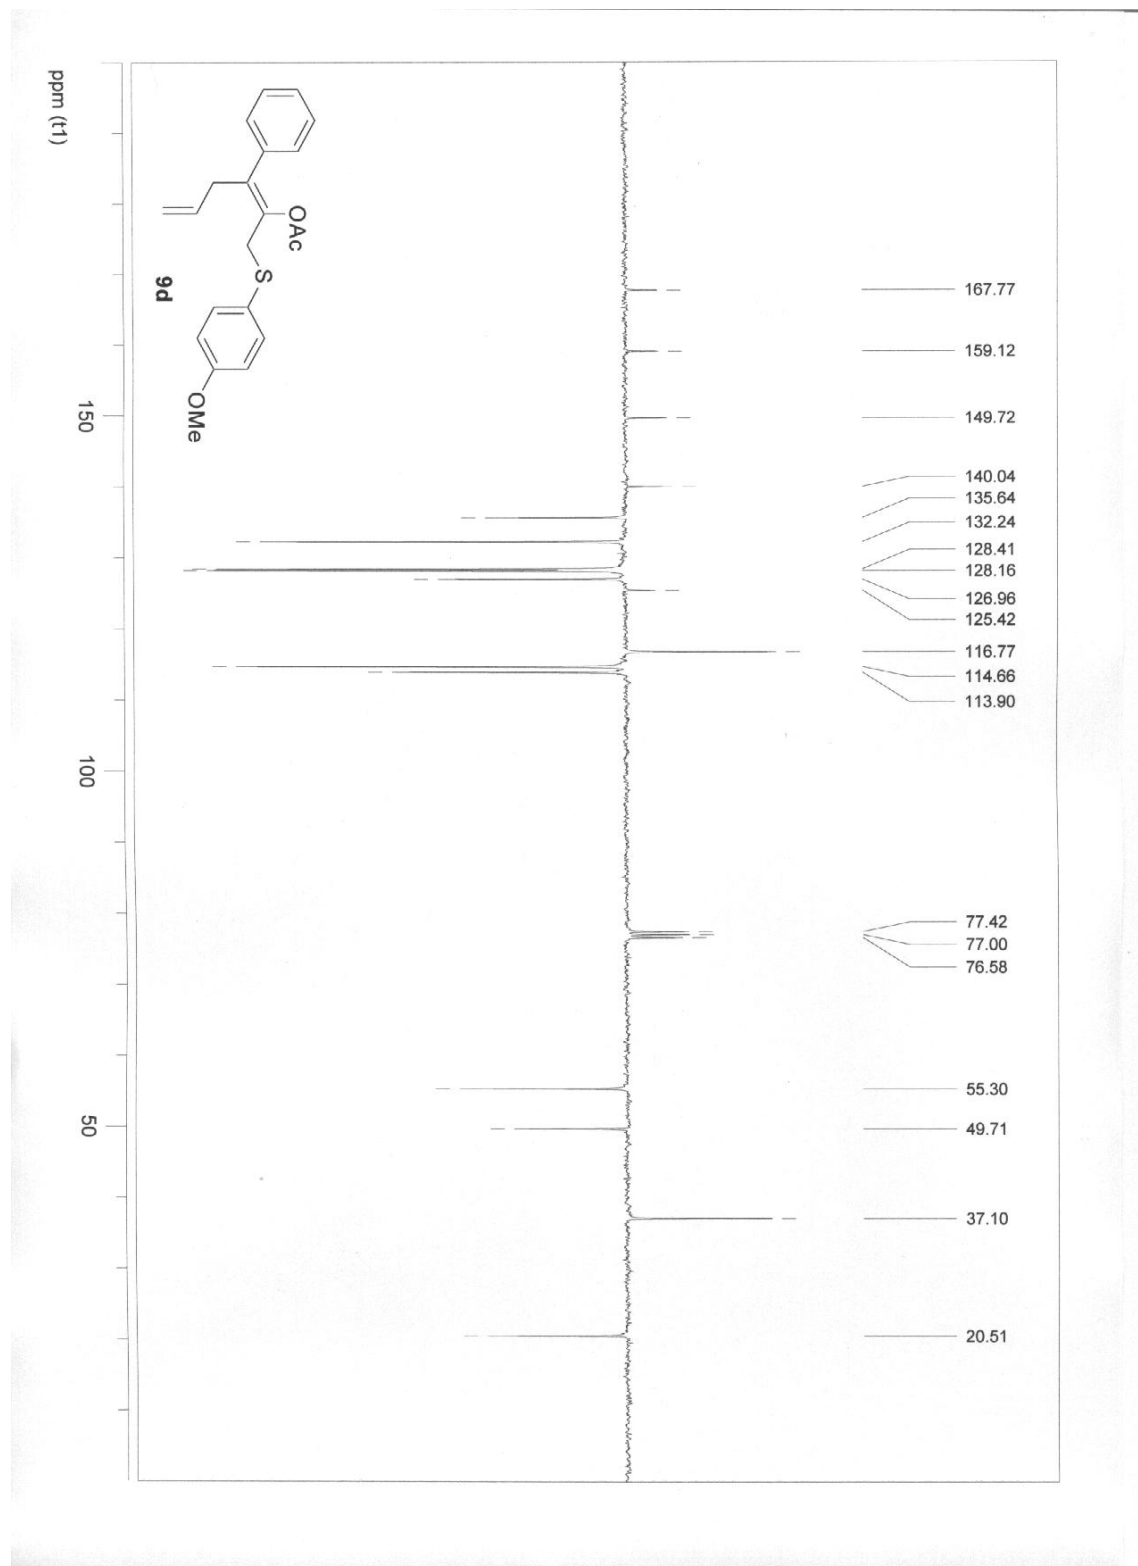

<sup>13</sup>C-NMR (75 MHz, CDCl<sub>3</sub>) of **9d**

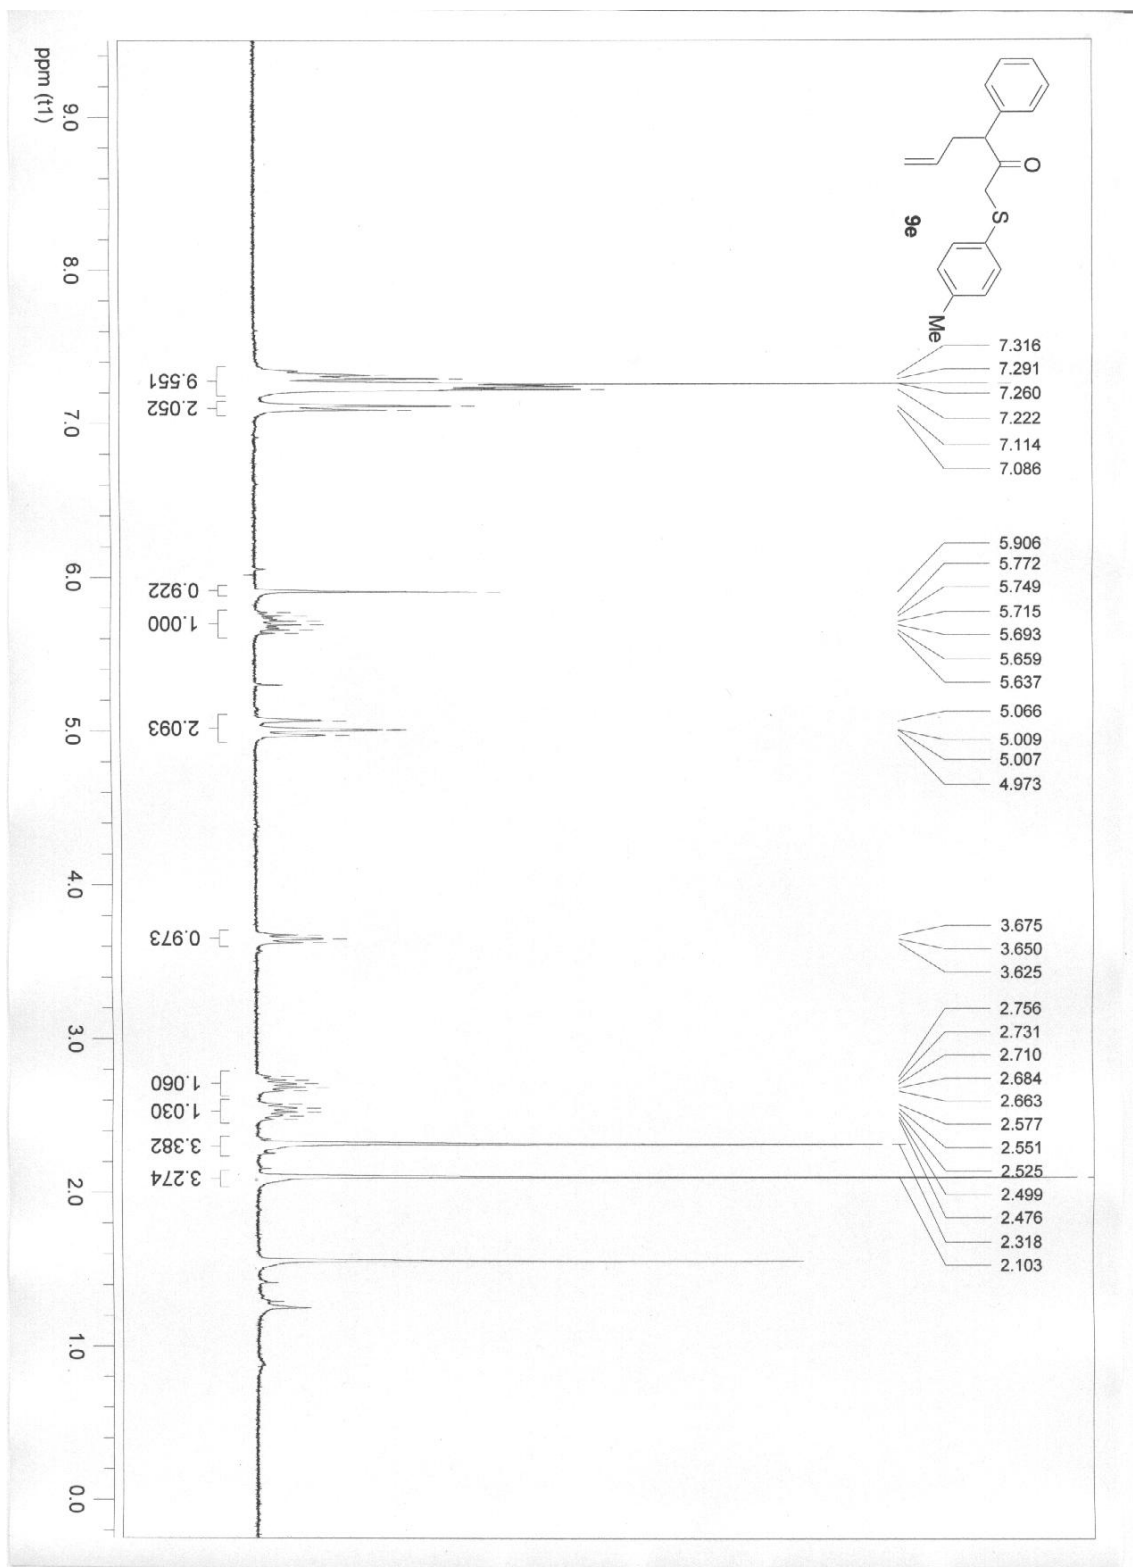

<sup>1</sup>H-NMR (300 MHz, CDCl<sub>3</sub>) of **9e**

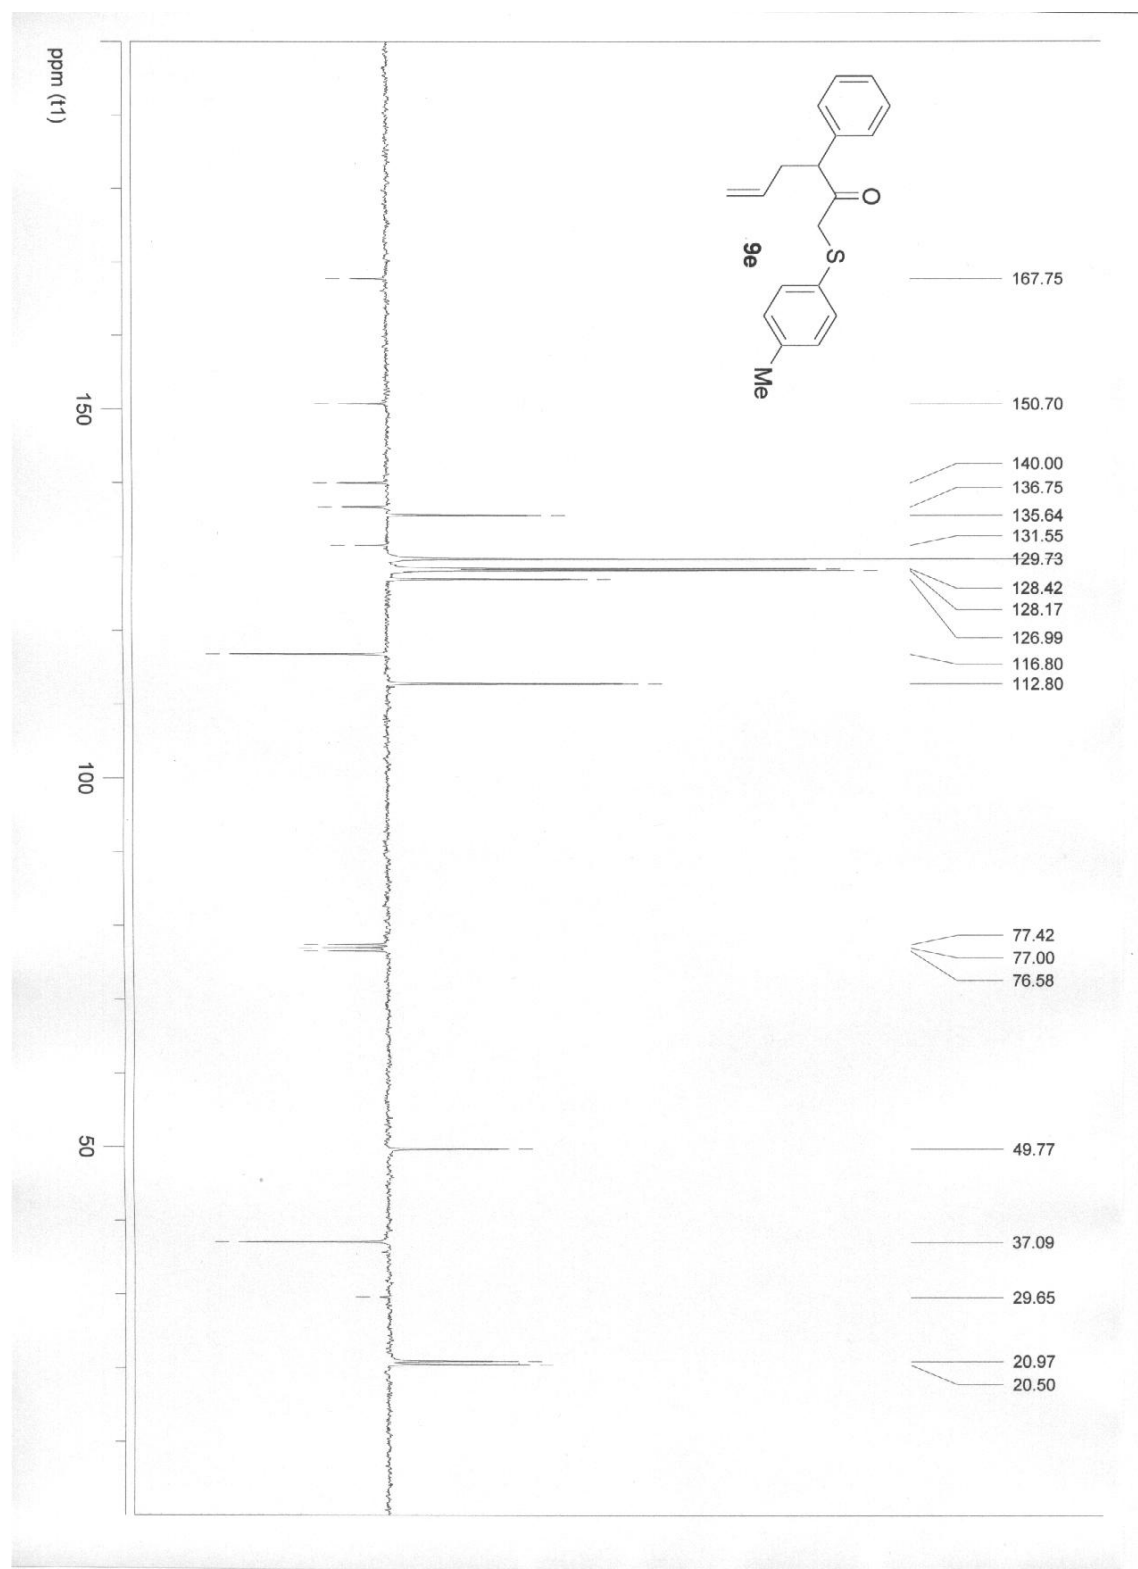

<sup>13</sup>C-NMR (75 MHz, CDCl<sub>3</sub>) of **9e**

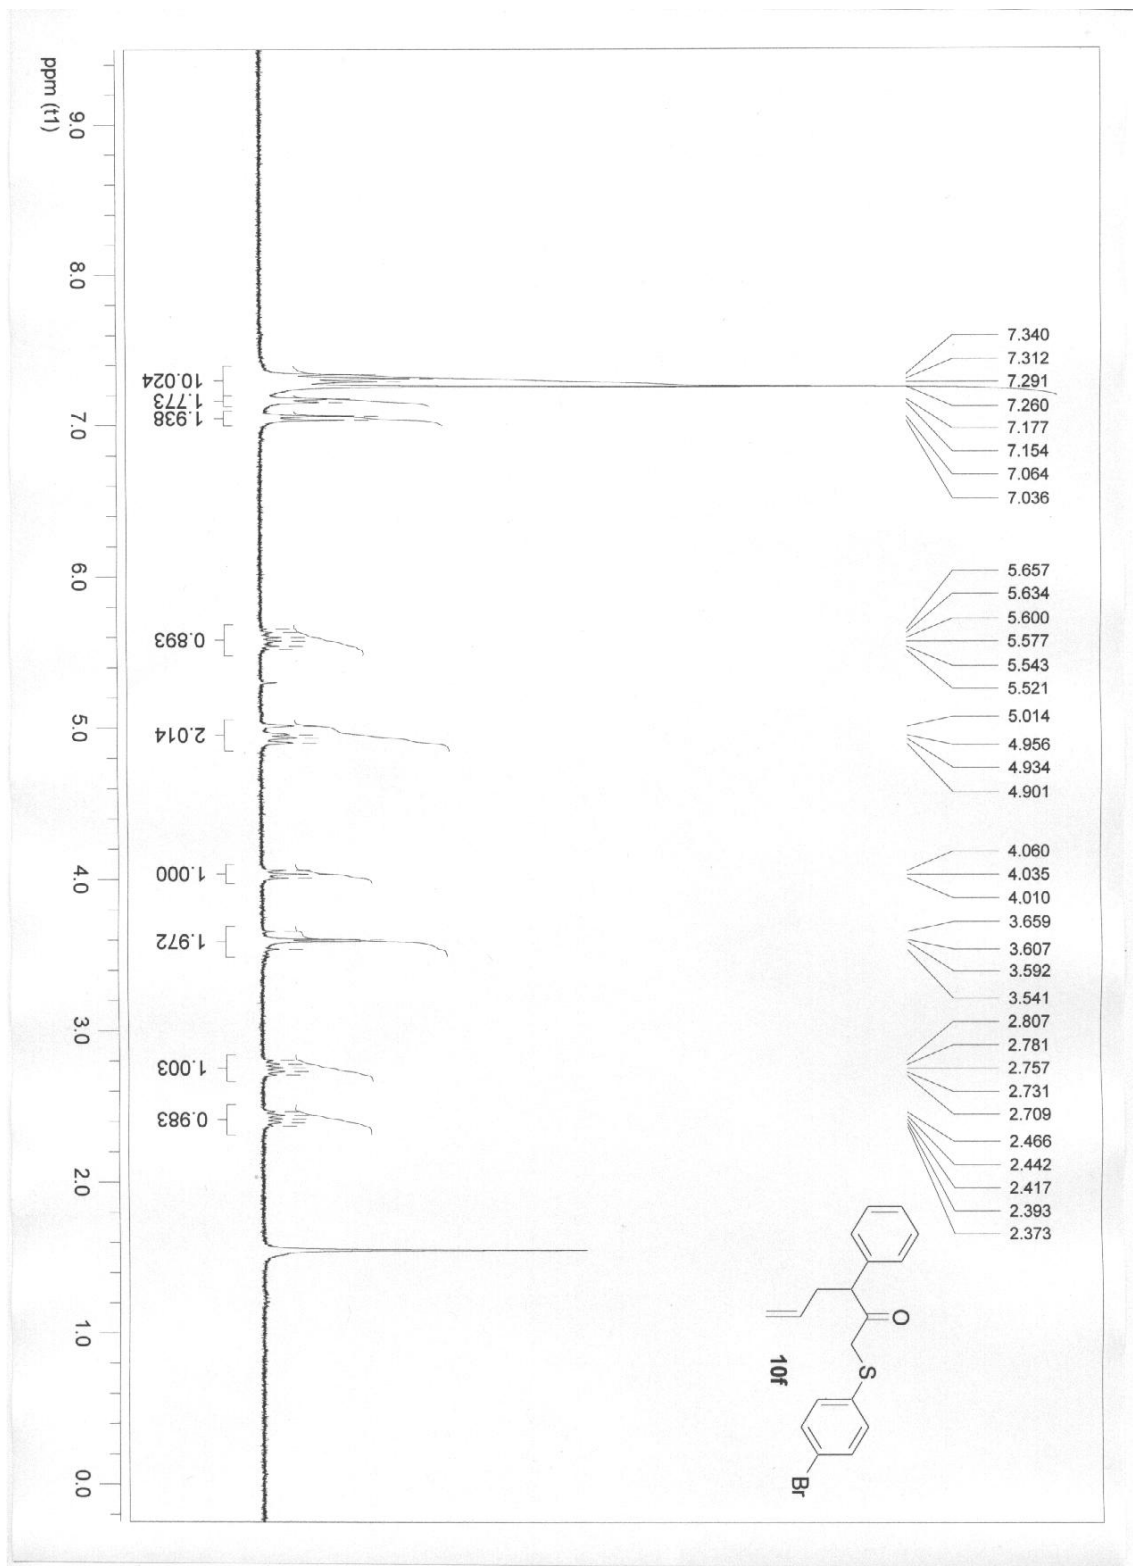

<sup>1</sup>H-NMR (300 MHz, CDCl<sub>3</sub>) of **10f**

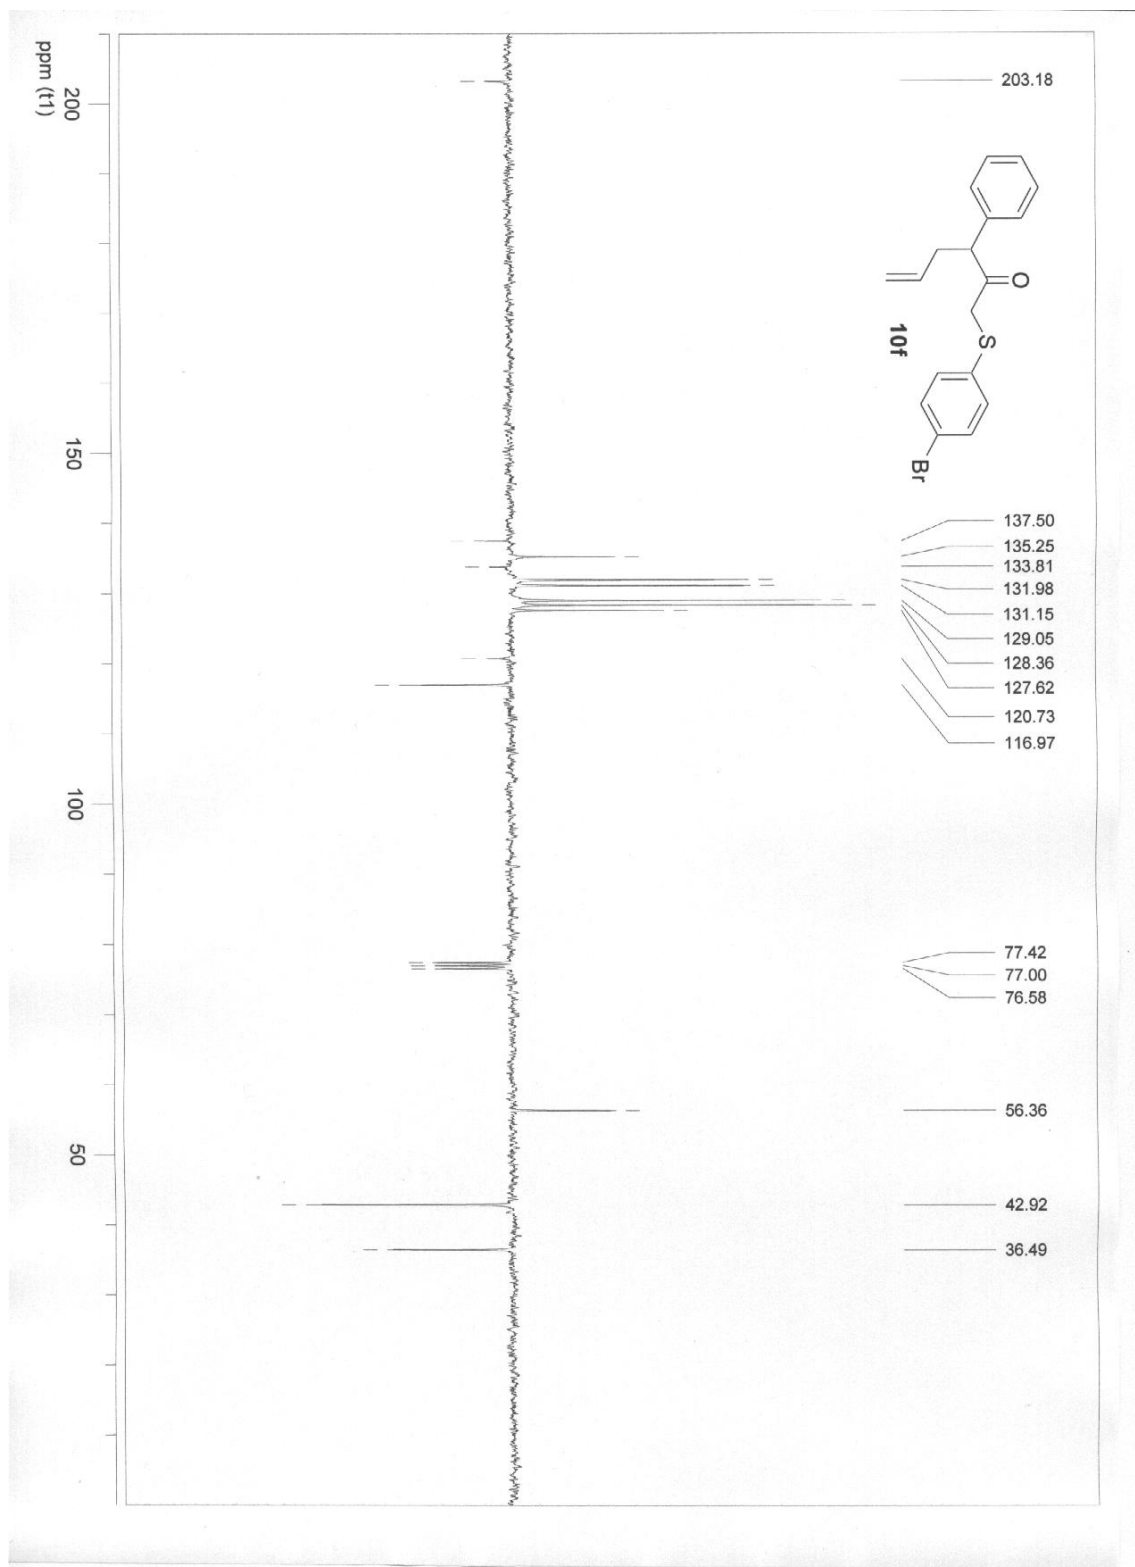

<sup>13</sup>C-NMR (75 MHz, CDCl<sub>3</sub>) of **10f**

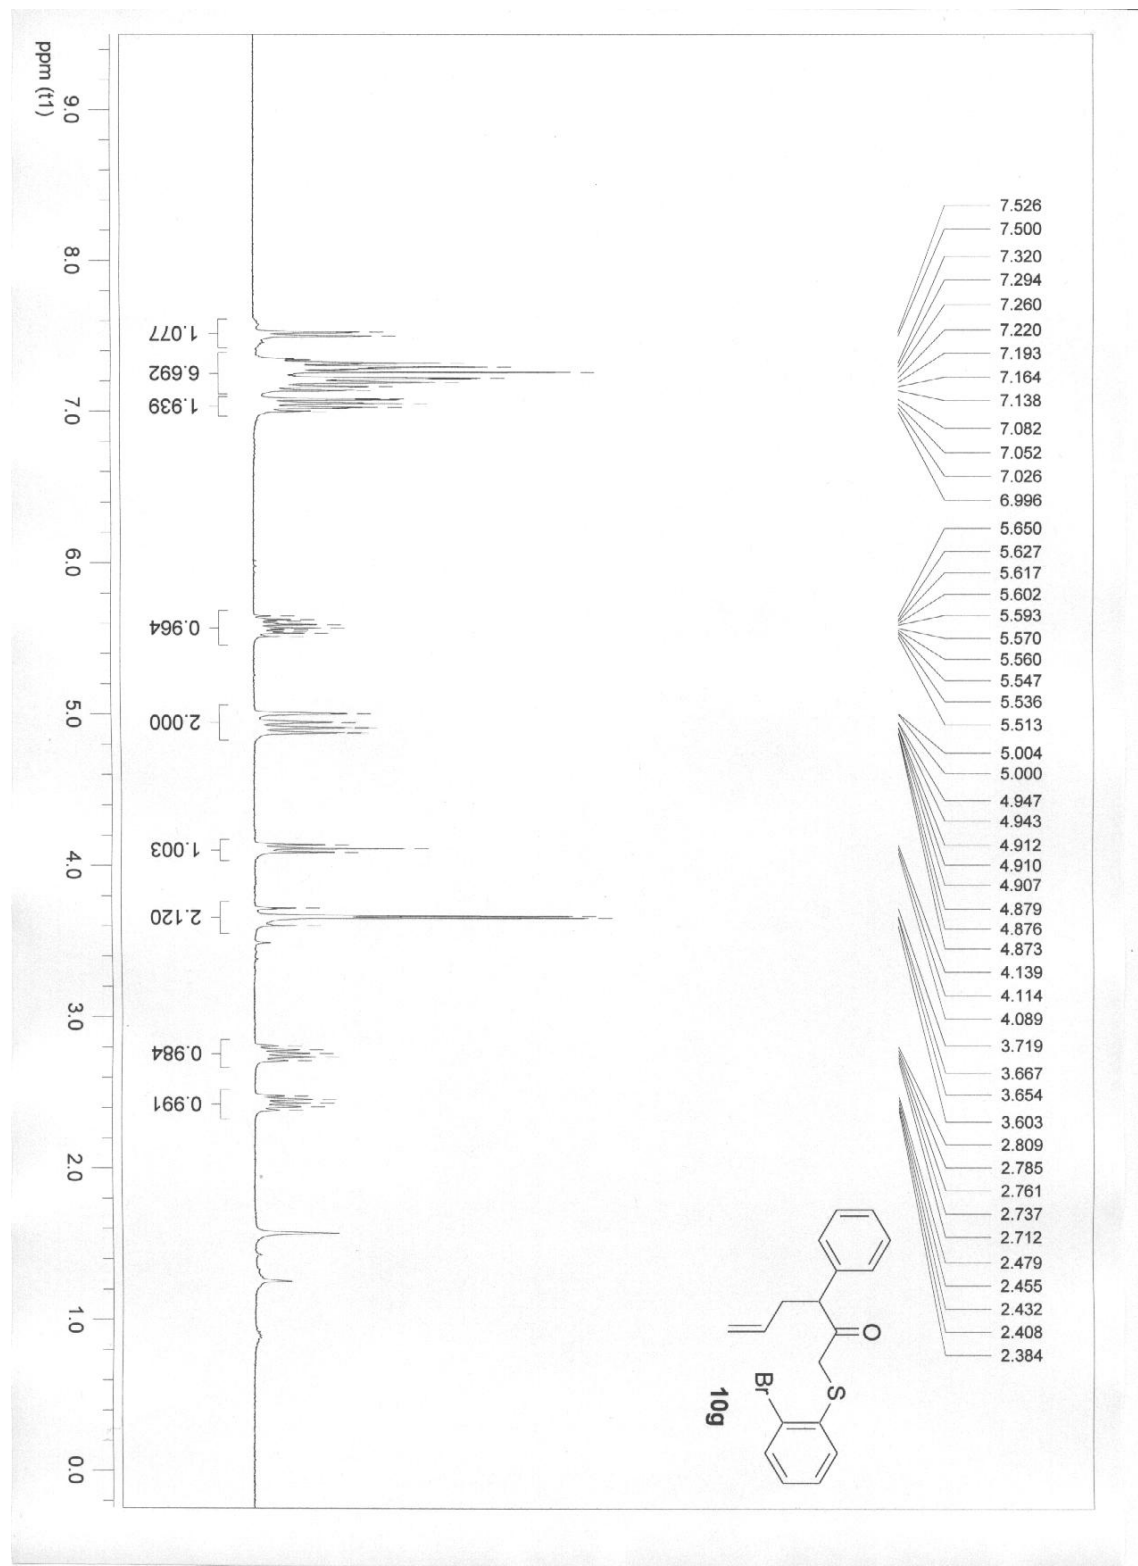

$^1\text{H}$ -NMR (300 MHz,  $\text{CDCl}_3$ ) of **10g**

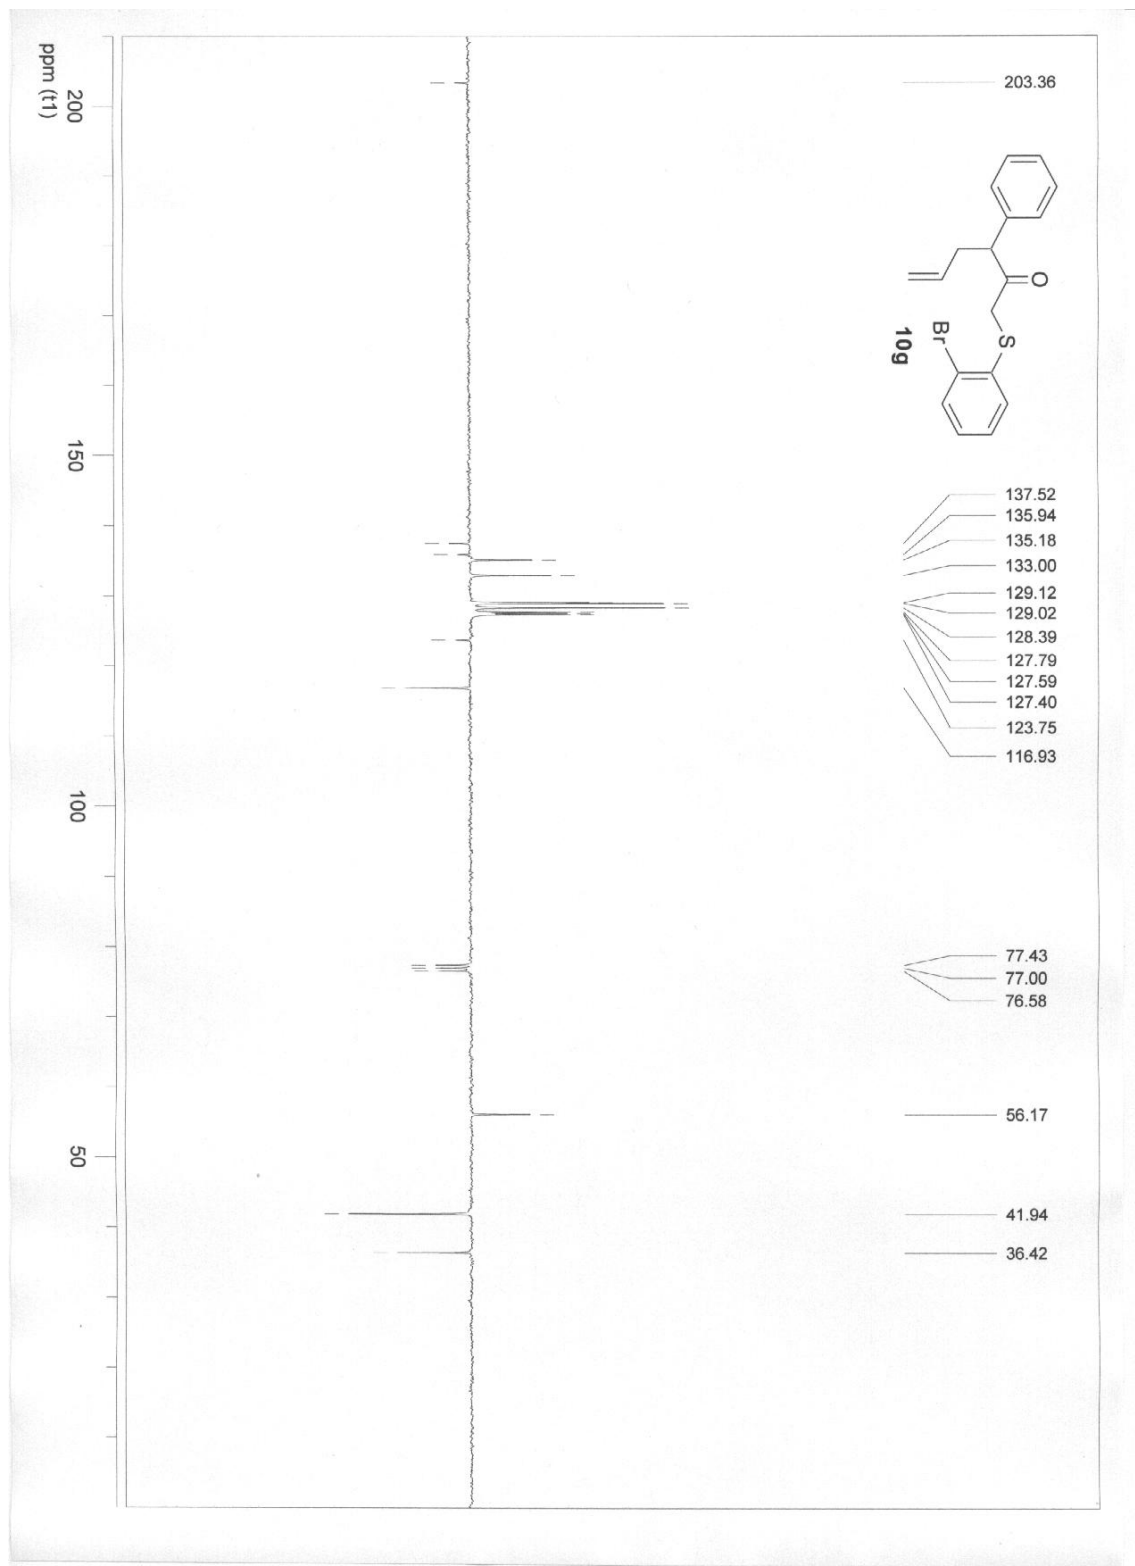

<sup>13</sup>C-NMR (75 MHz, CDCl<sub>3</sub>) of **10g**



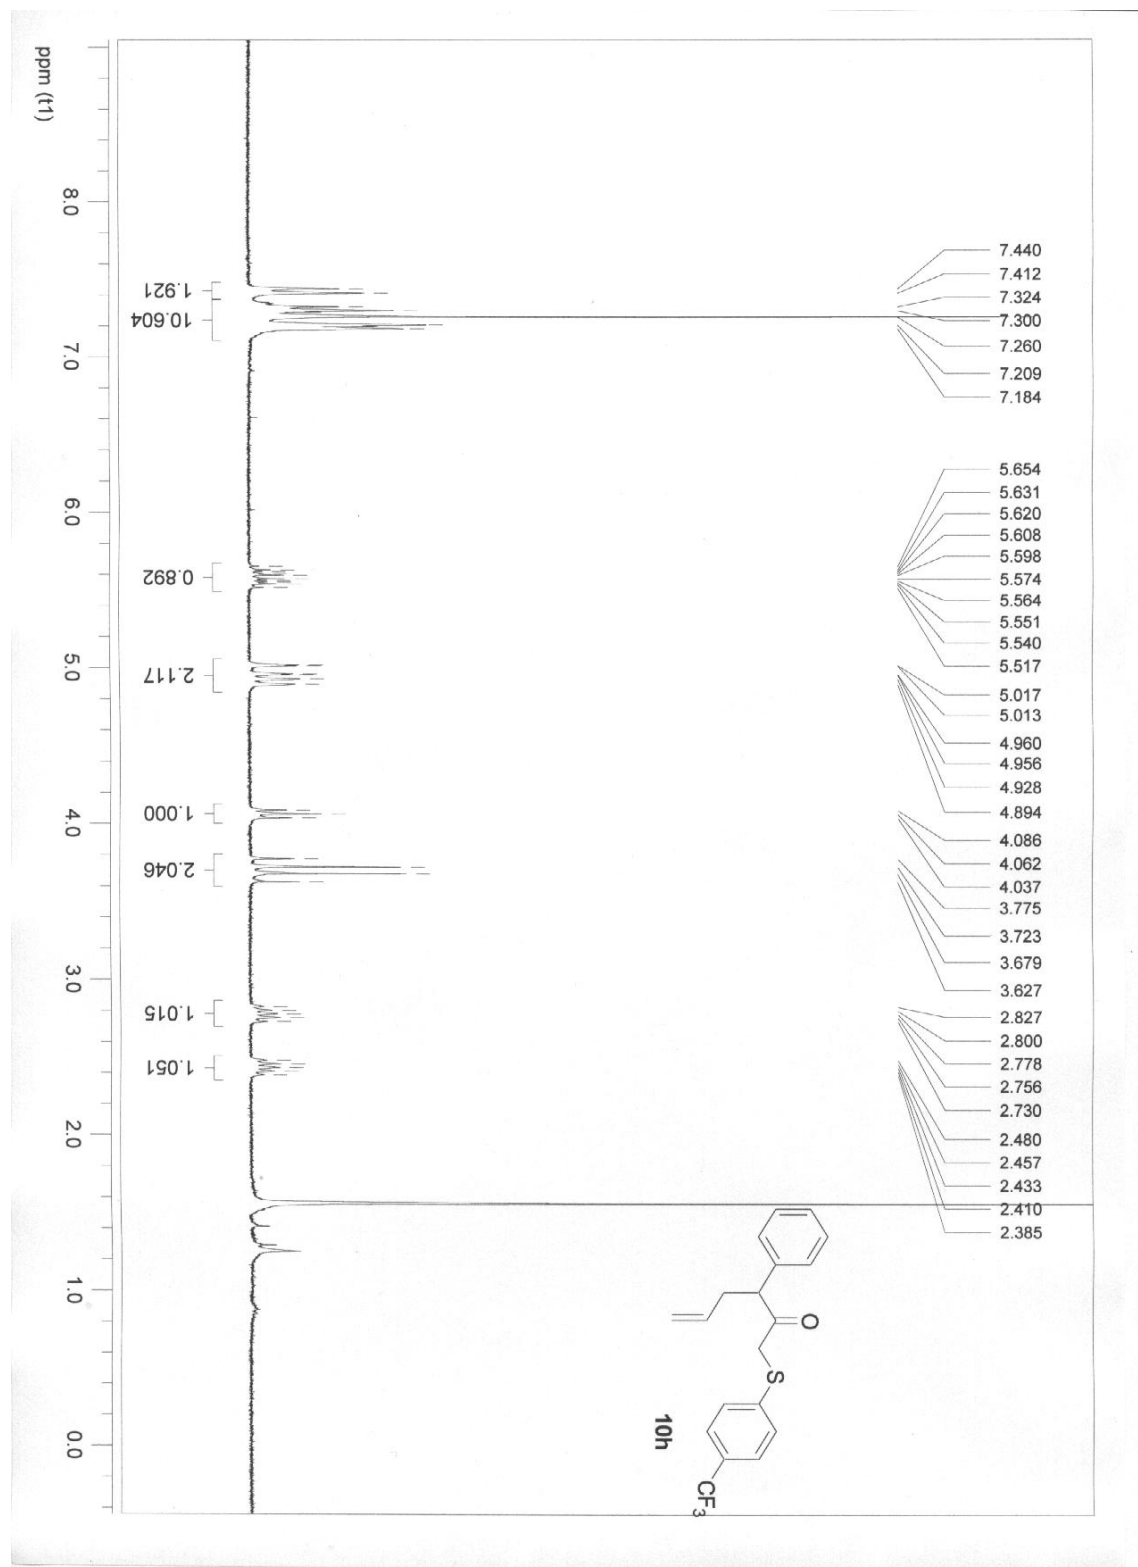

<sup>1</sup>H-NMR (300 MHz, CDCl<sub>3</sub>) of **10h**

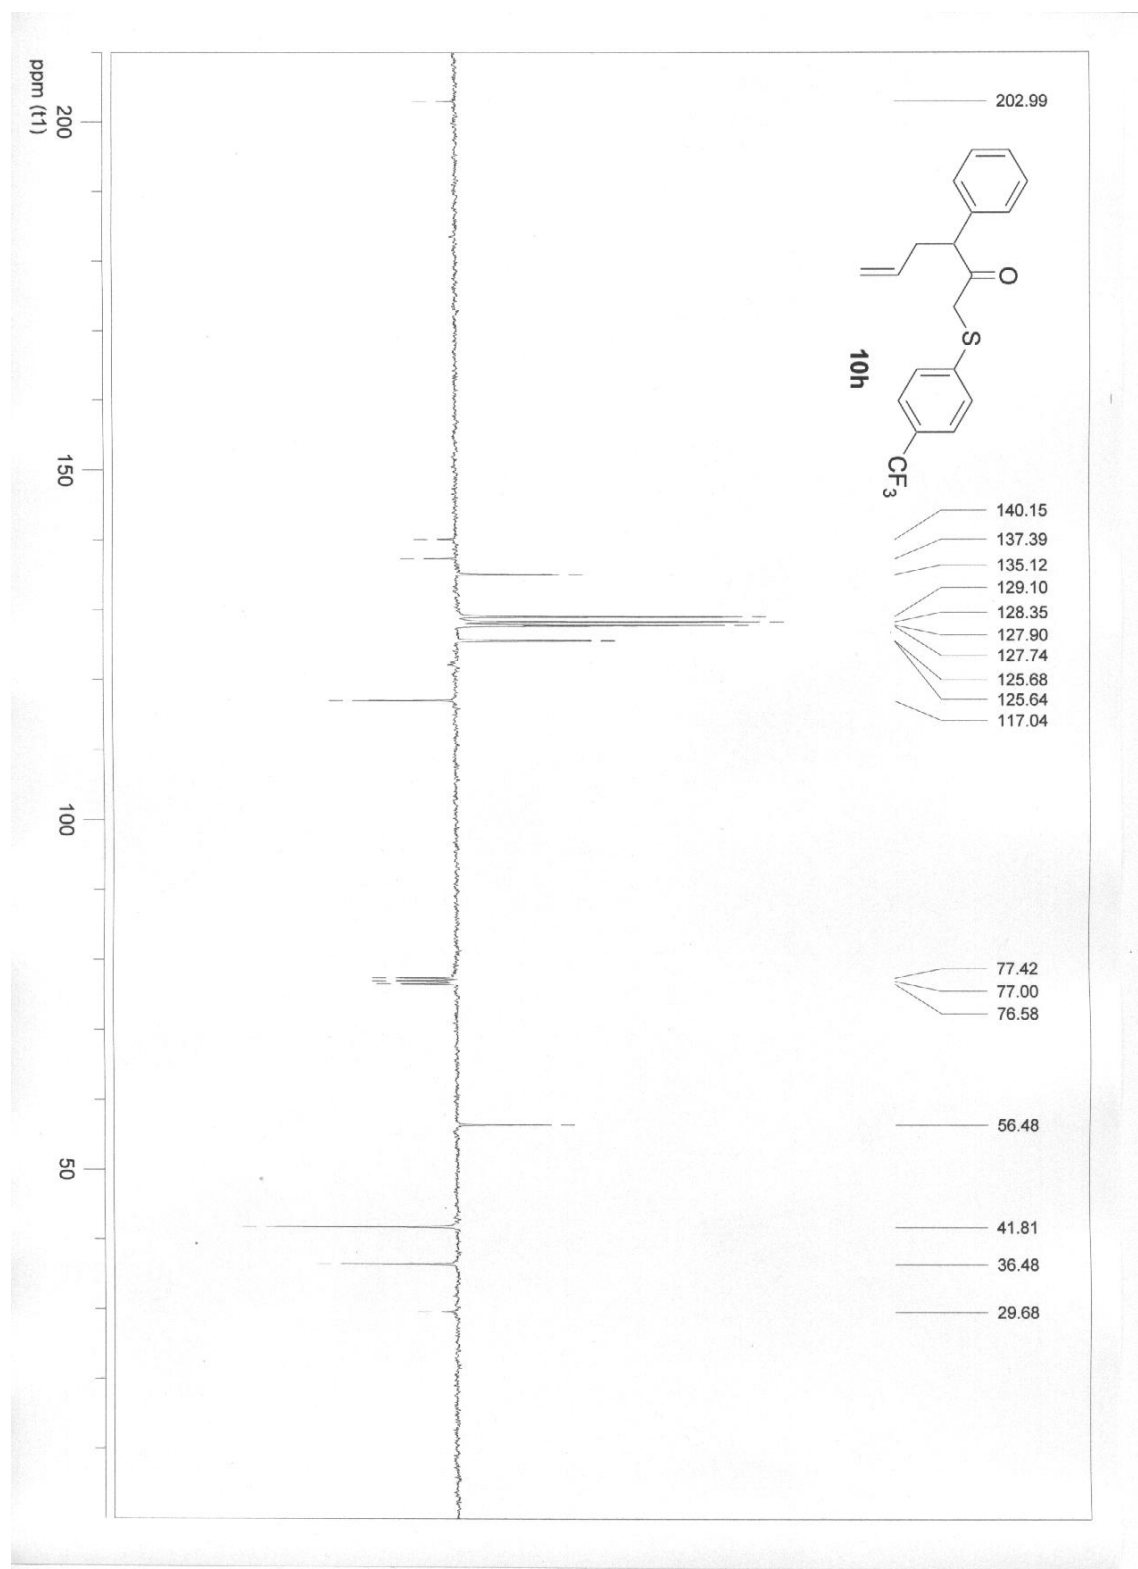

<sup>13</sup>C-NMR (75 MHz, CDCl<sub>3</sub>) of **10h**

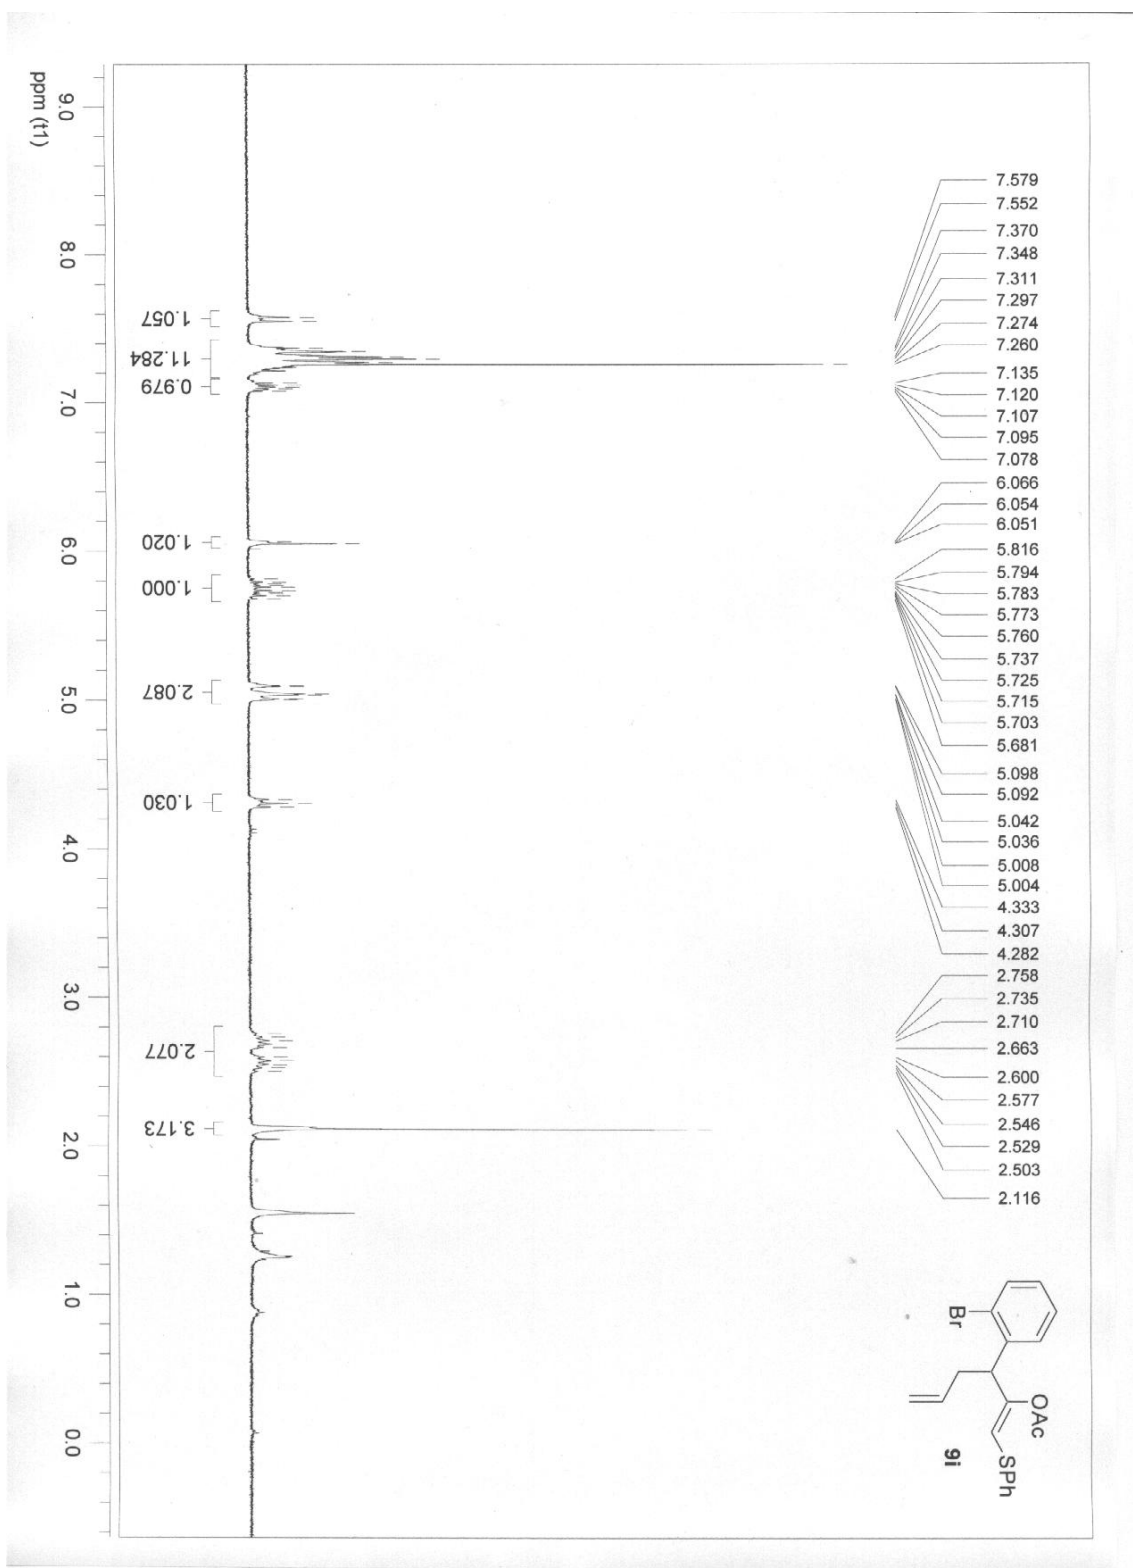

$^1\text{H}$ -NMR (300 MHz,  $\text{CDCl}_3$ ) of **9i**

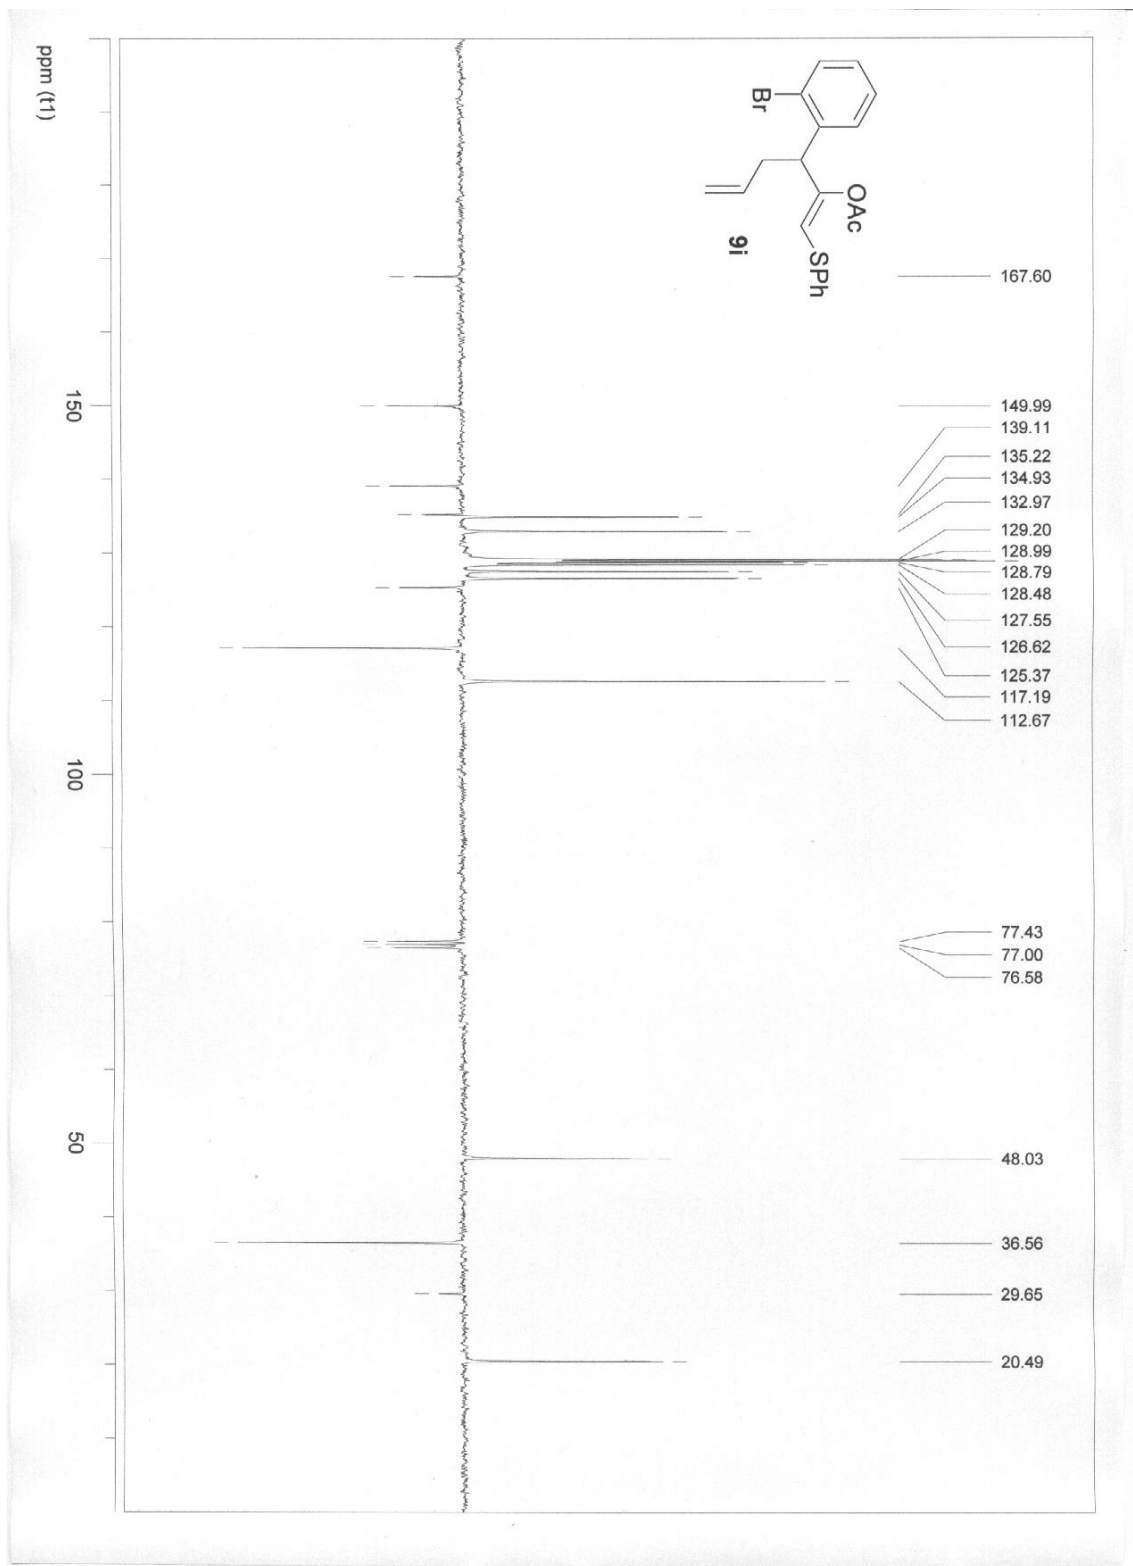

<sup>13</sup>C-NMR (75 MHz, CDCl<sub>3</sub>) of **9i**

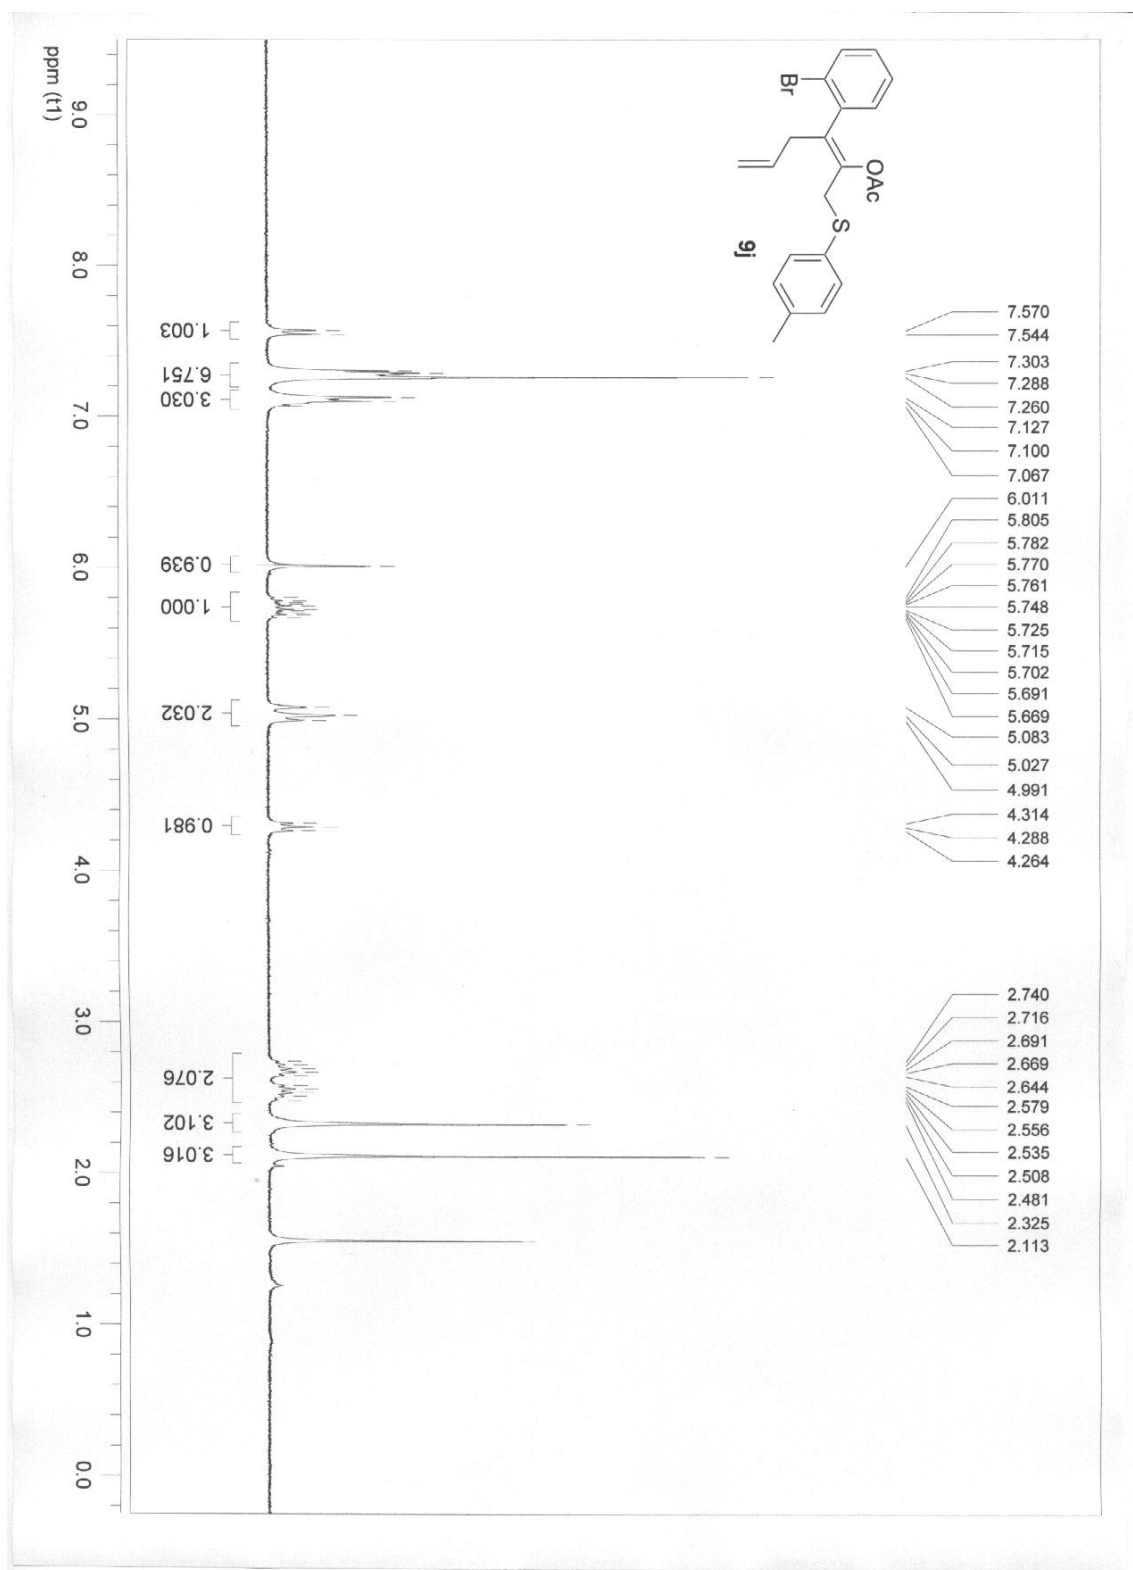

<sup>1</sup>H-NMR (300 MHz, CDCl<sub>3</sub>) of **9j**

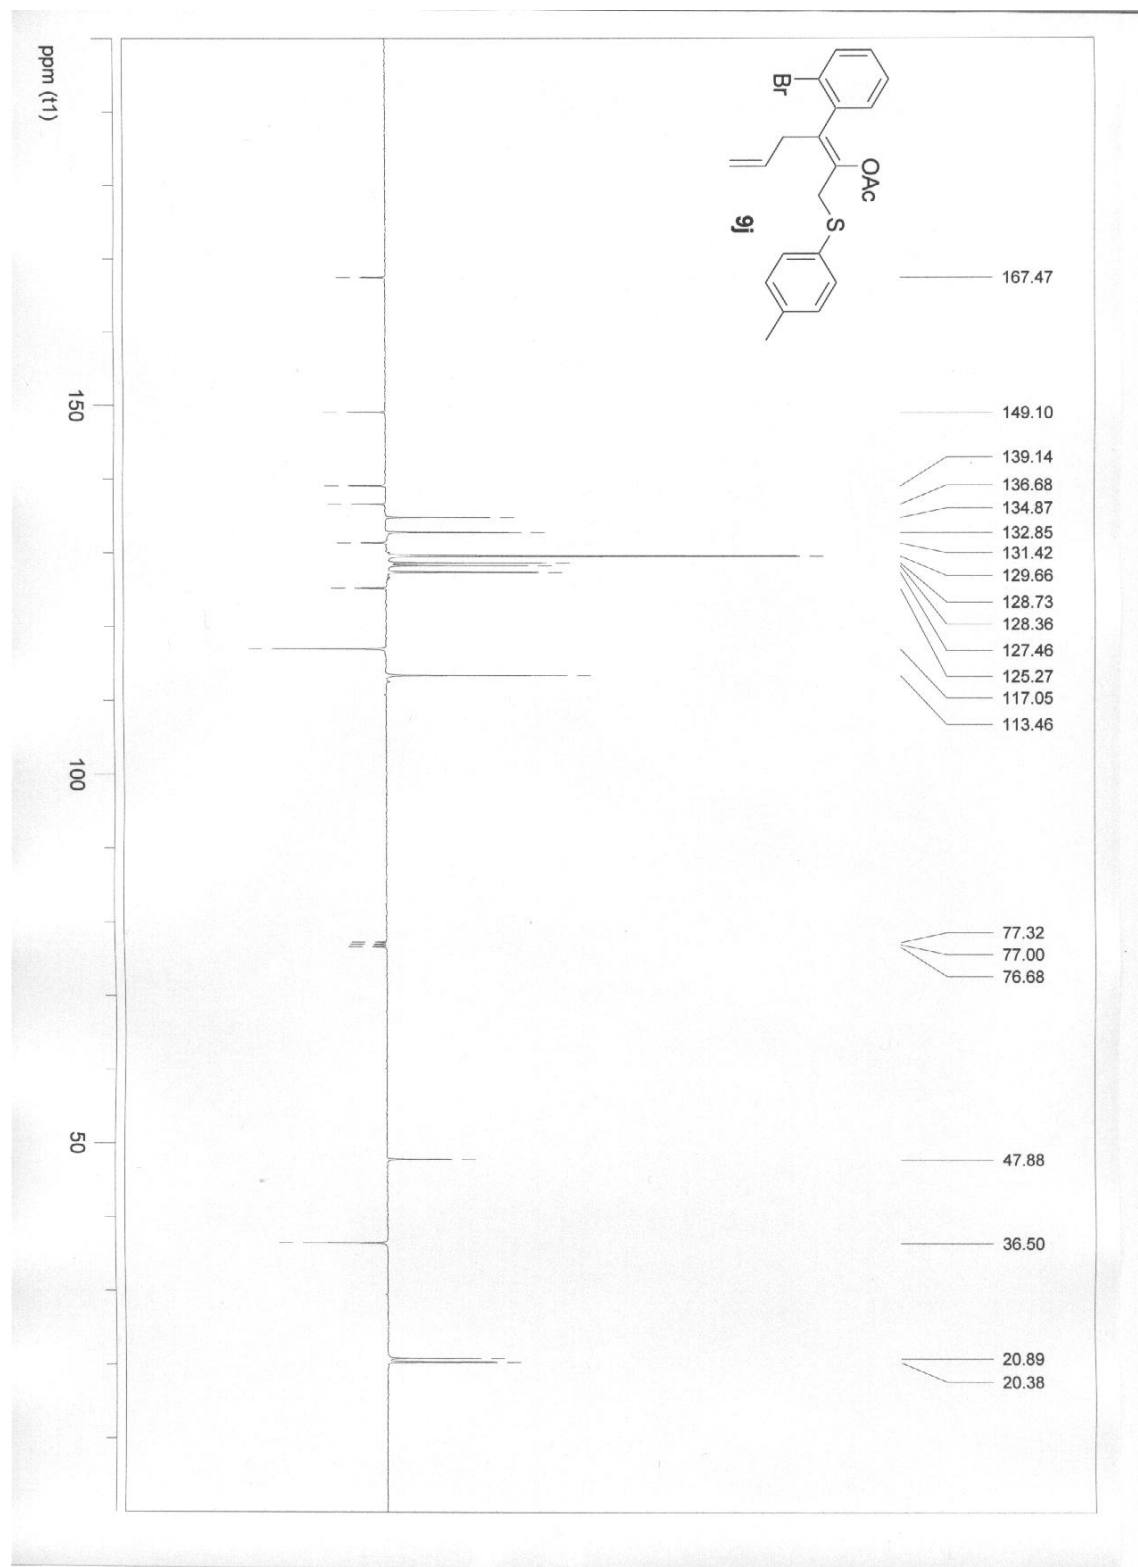

<sup>13</sup>C-NMR (75 MHz, CDCl<sub>3</sub>) of **9j**

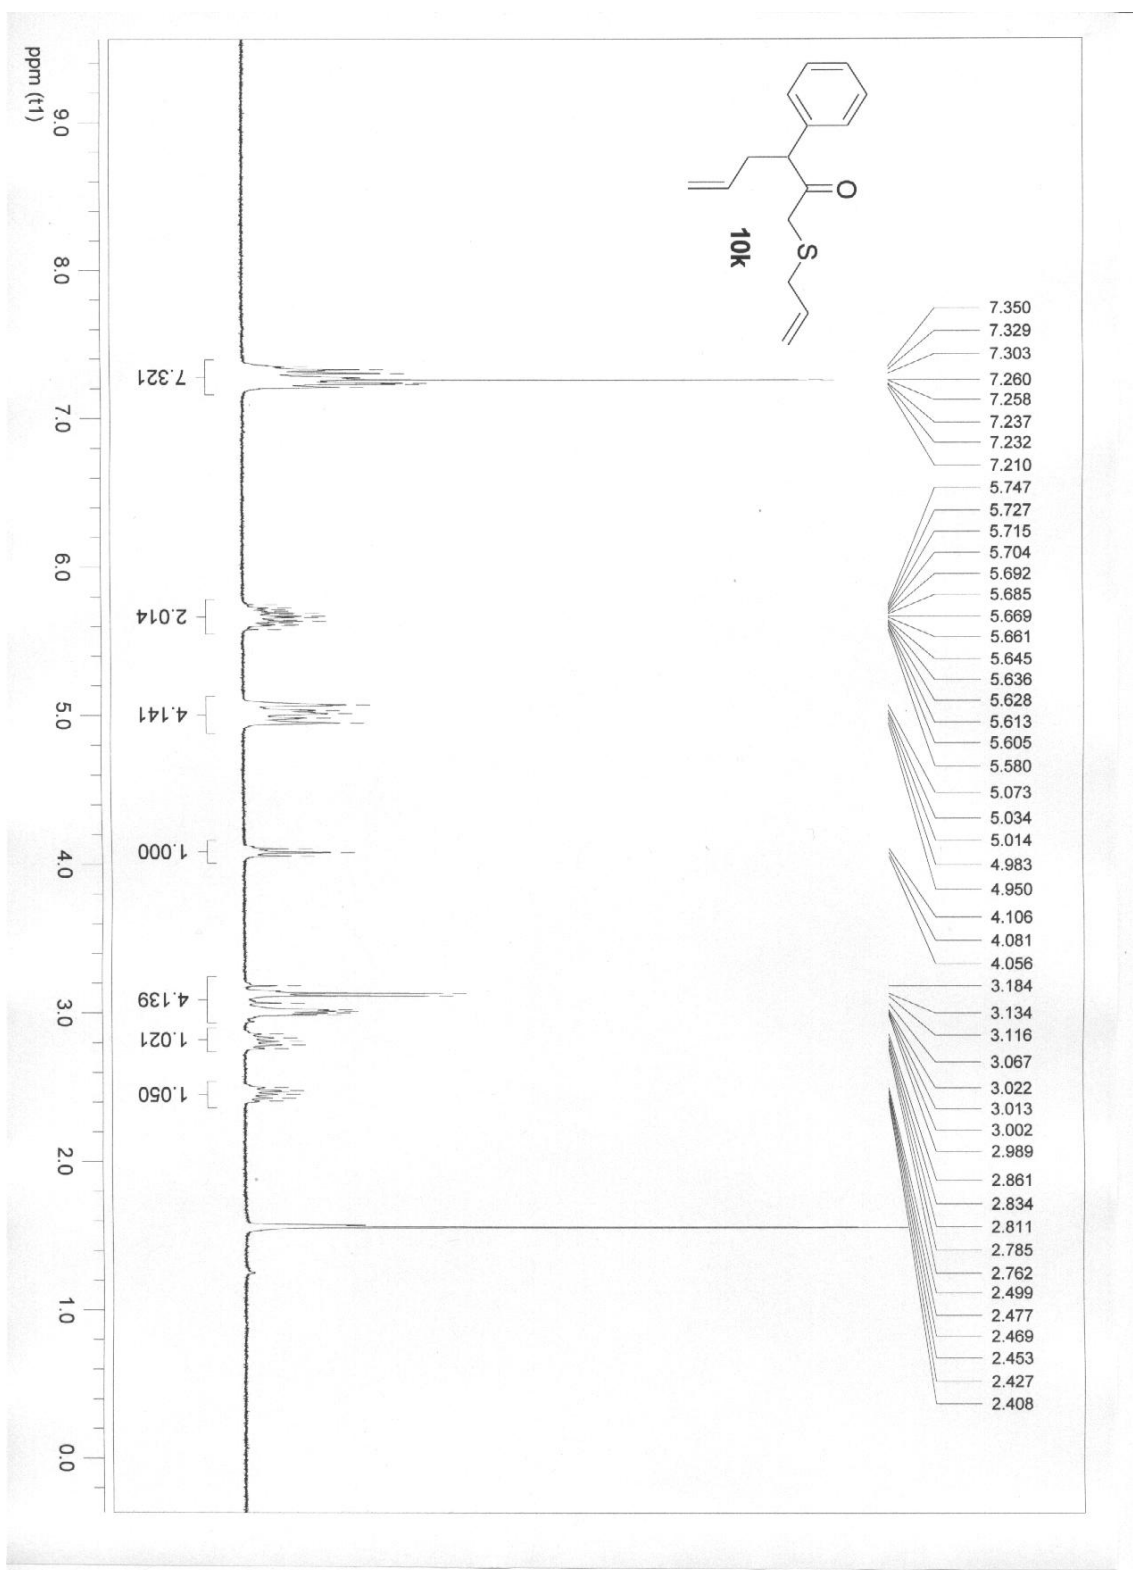

<sup>1</sup>H-NMR (300 MHz, CDCl<sub>3</sub>) of **10k**

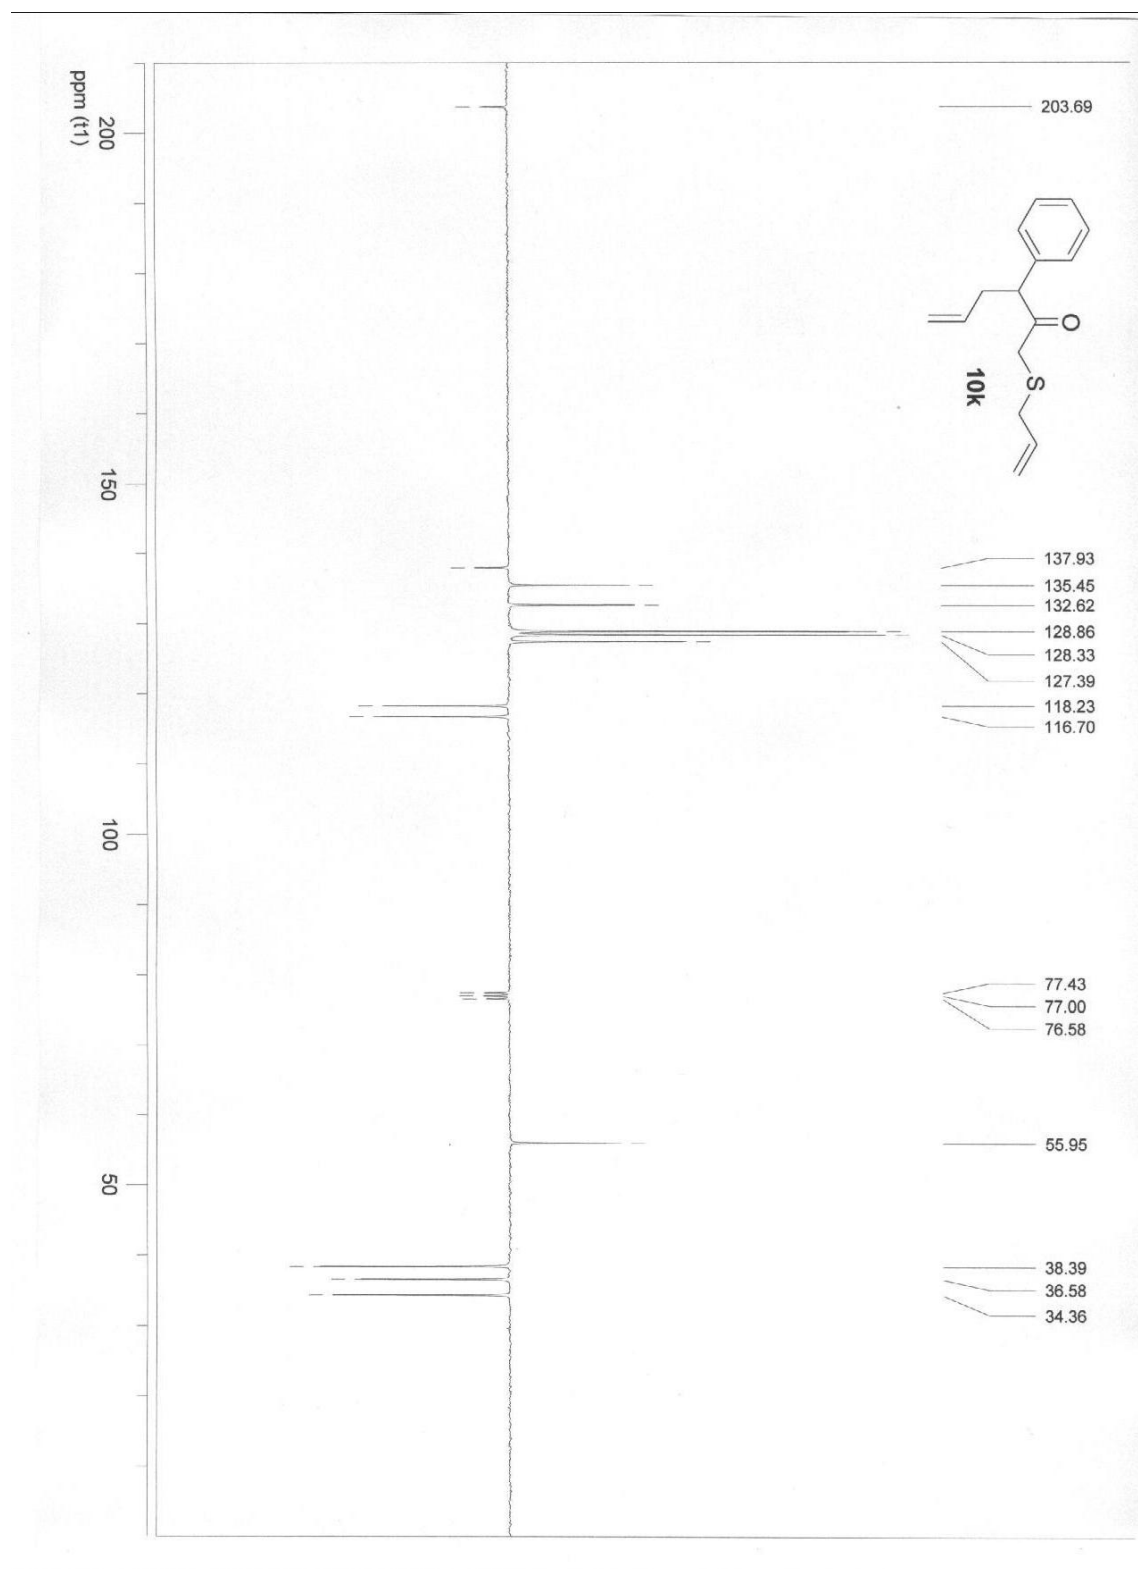

$^{13}\text{C}$ -NMR (75 MHz,  $\text{CDCl}_3$ ) of **10k**



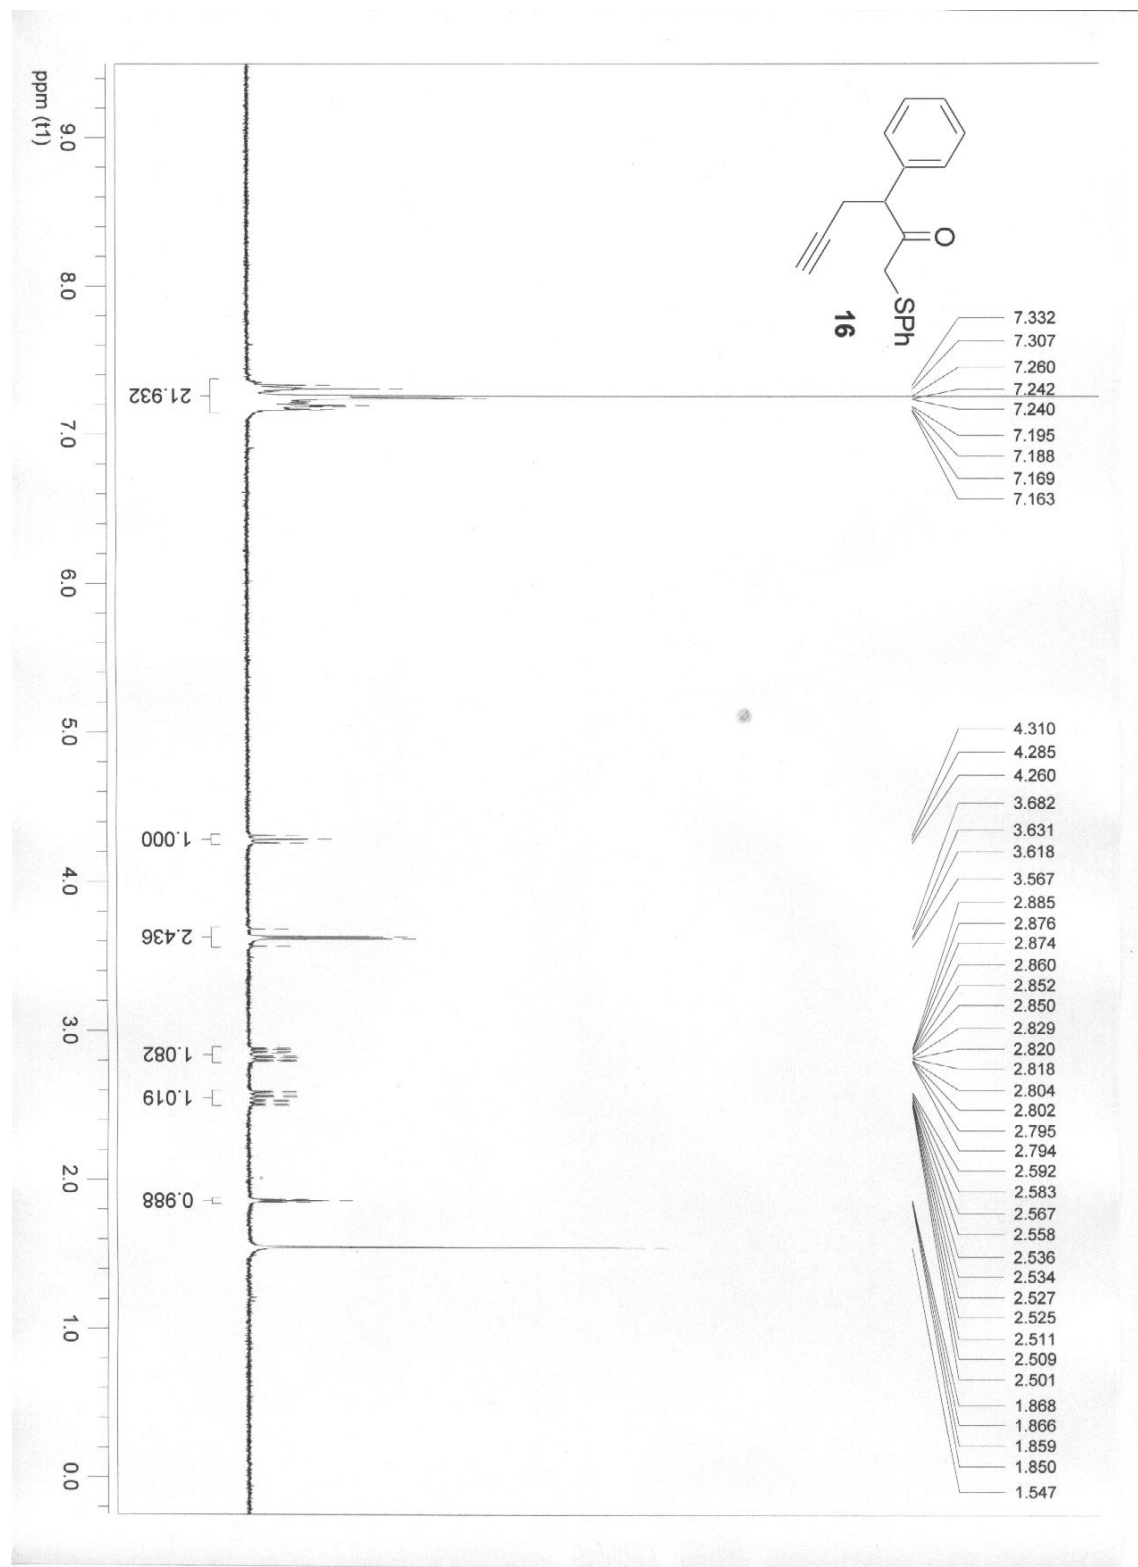

<sup>1</sup>H-NMR (300 MHz, CDCl<sub>3</sub>) of **16**

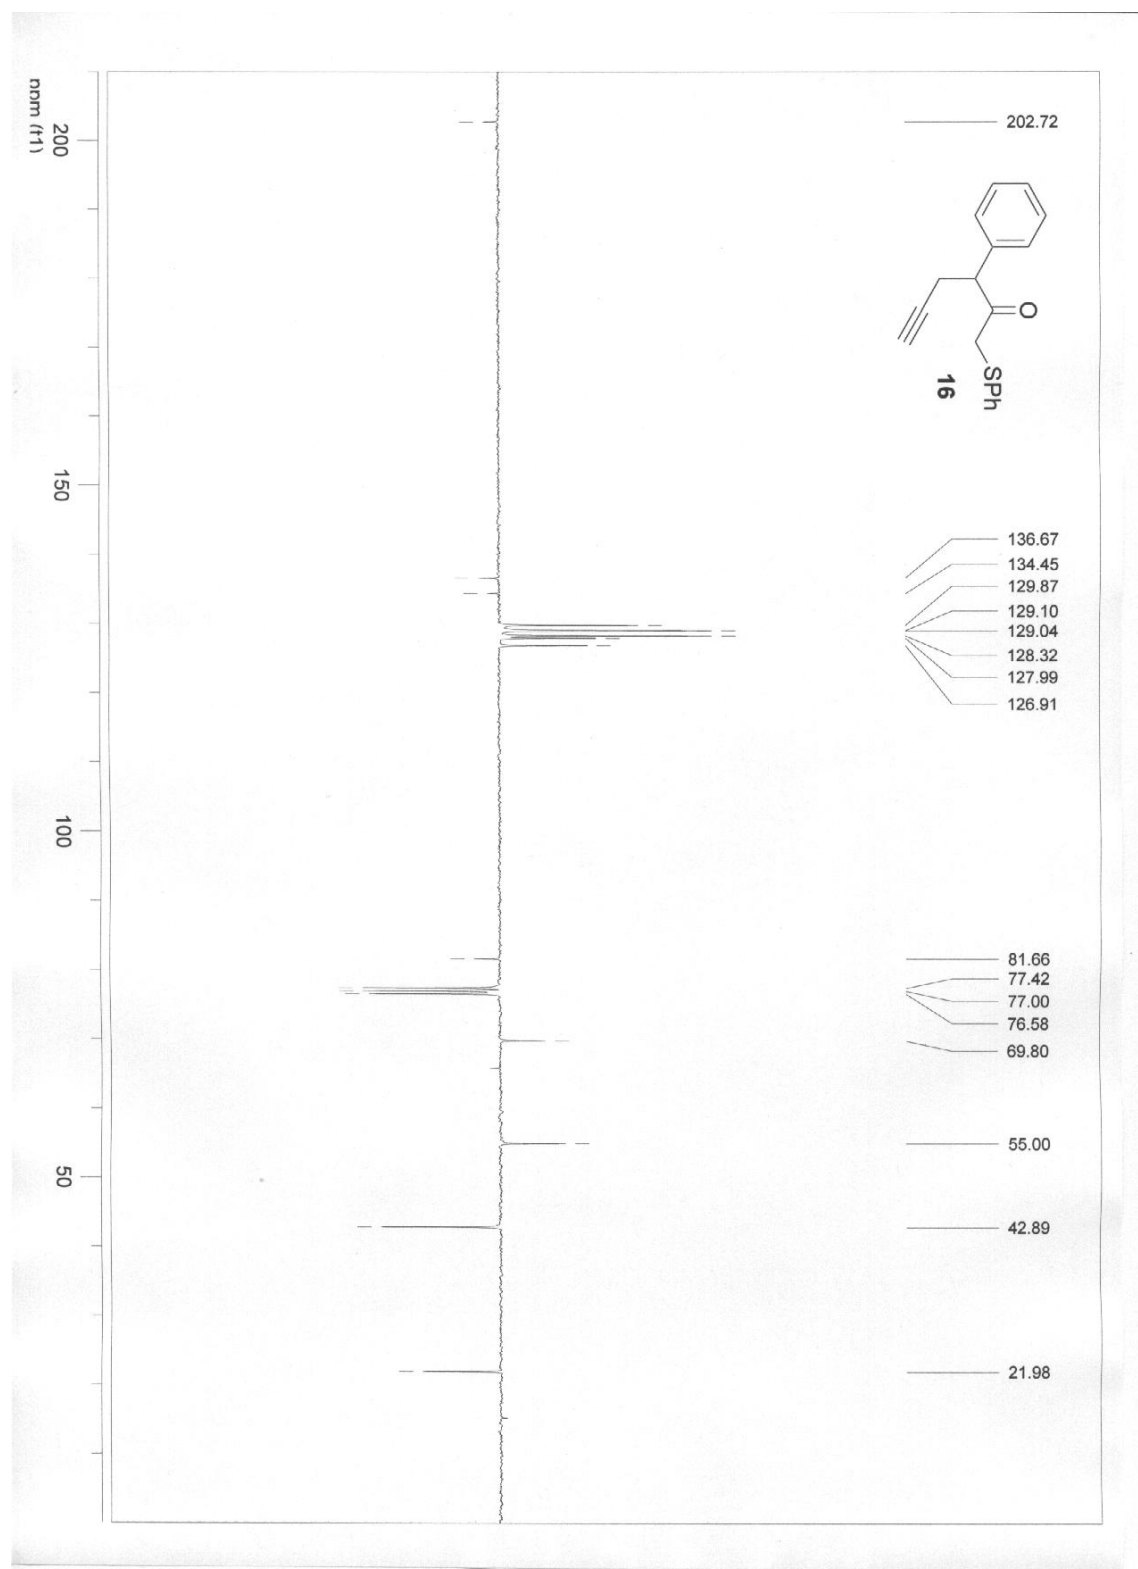

<sup>13</sup>C-NMR (75 MHz, CDCl<sub>3</sub>) of **16**

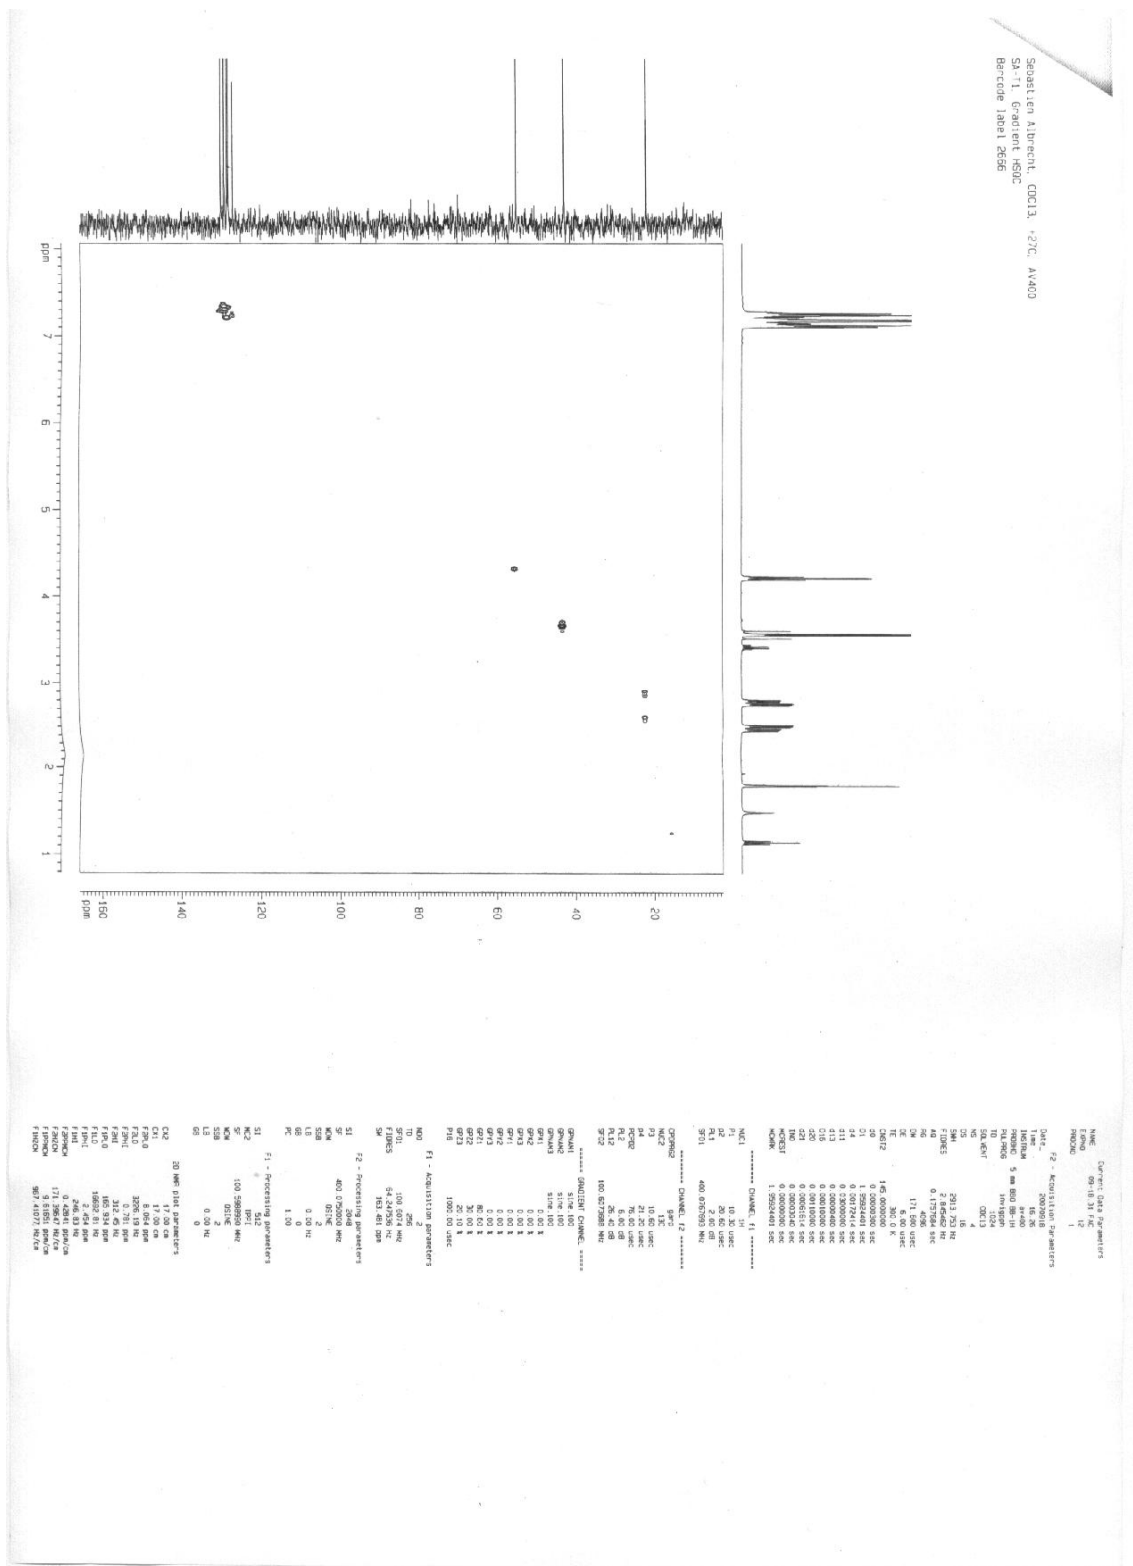

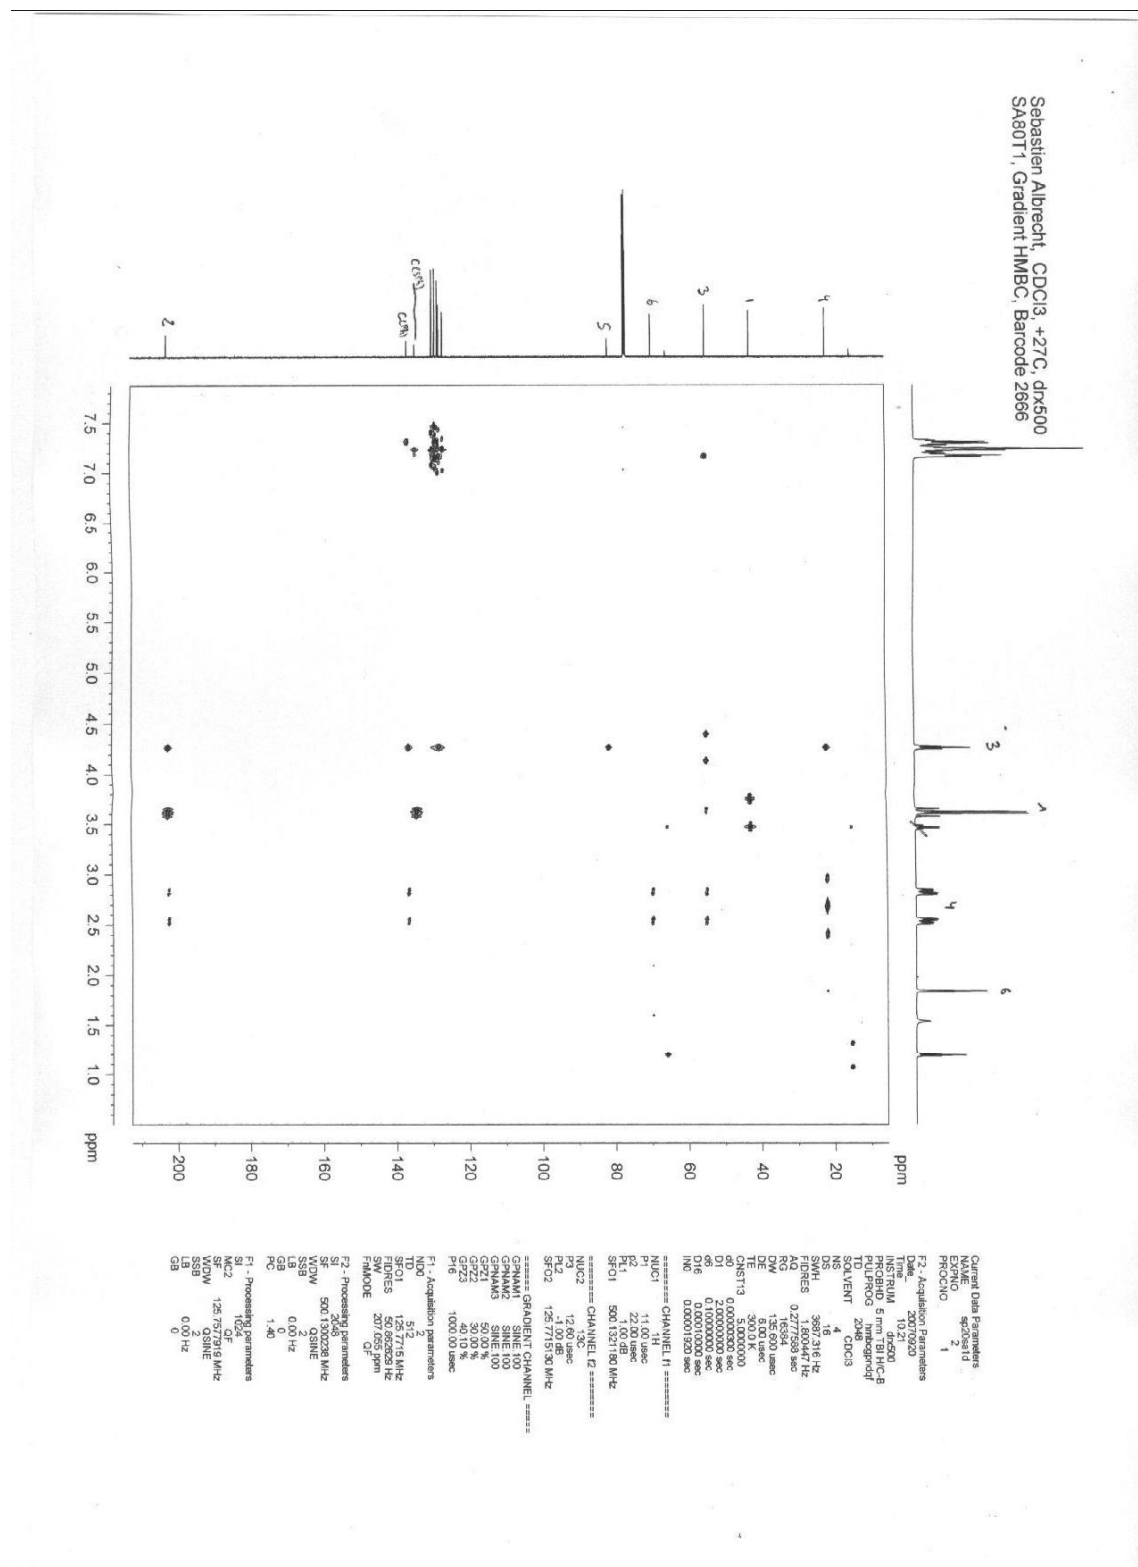

HMBC of 16

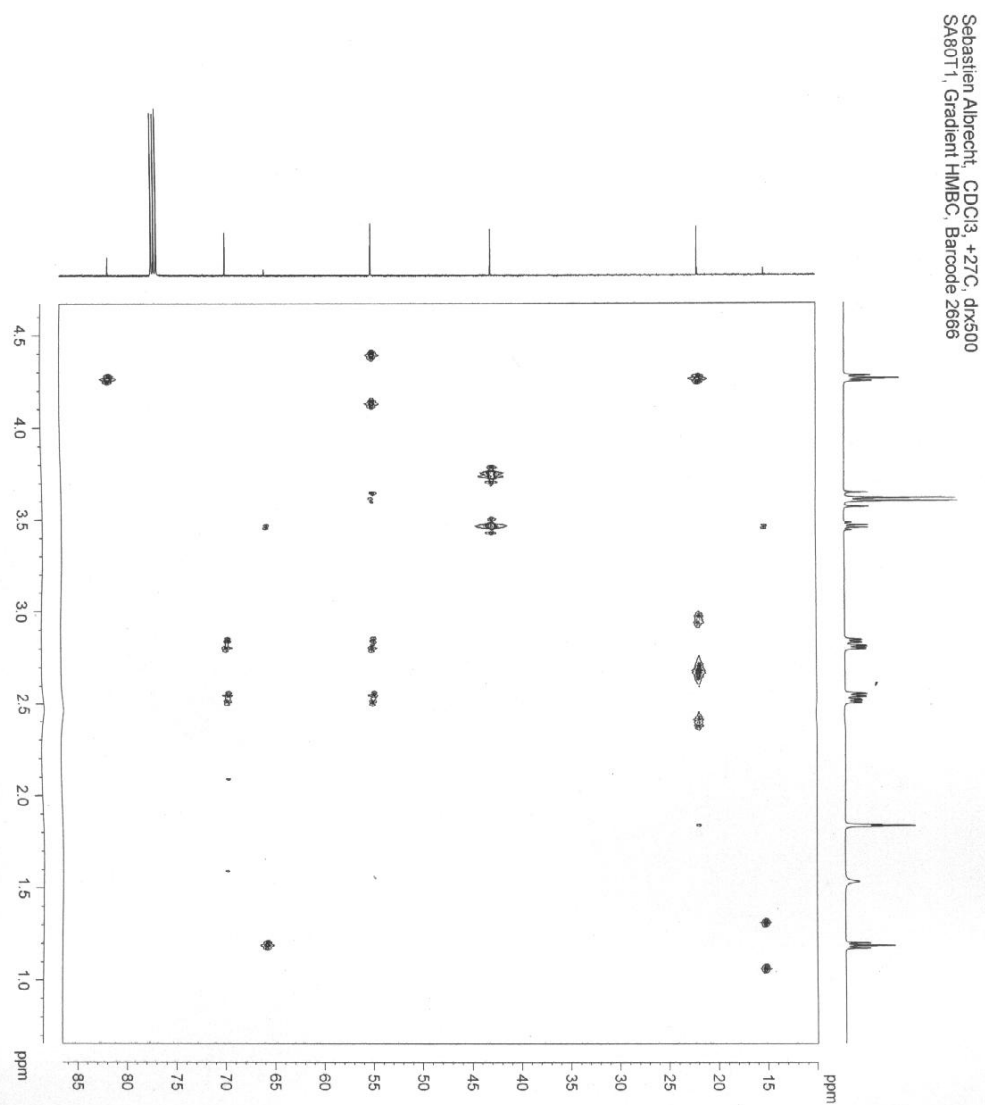

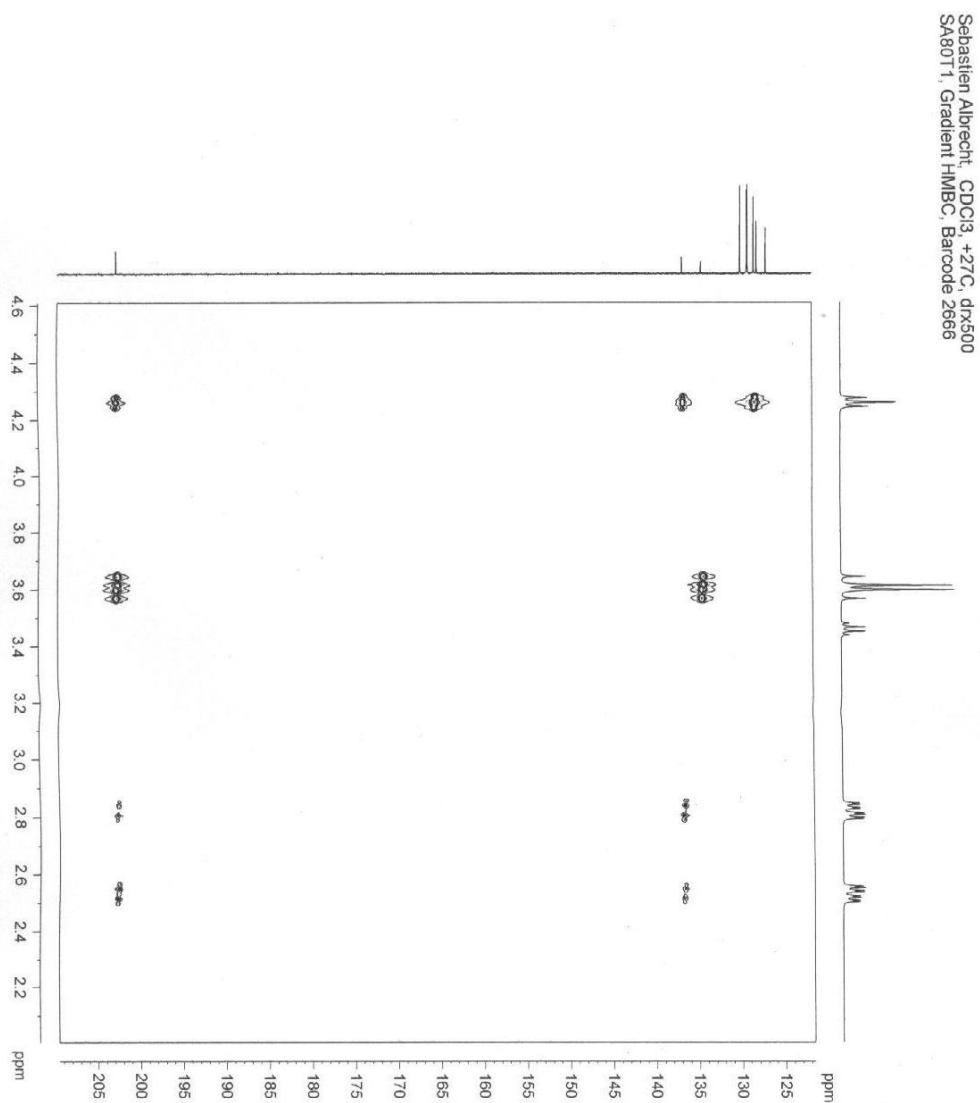

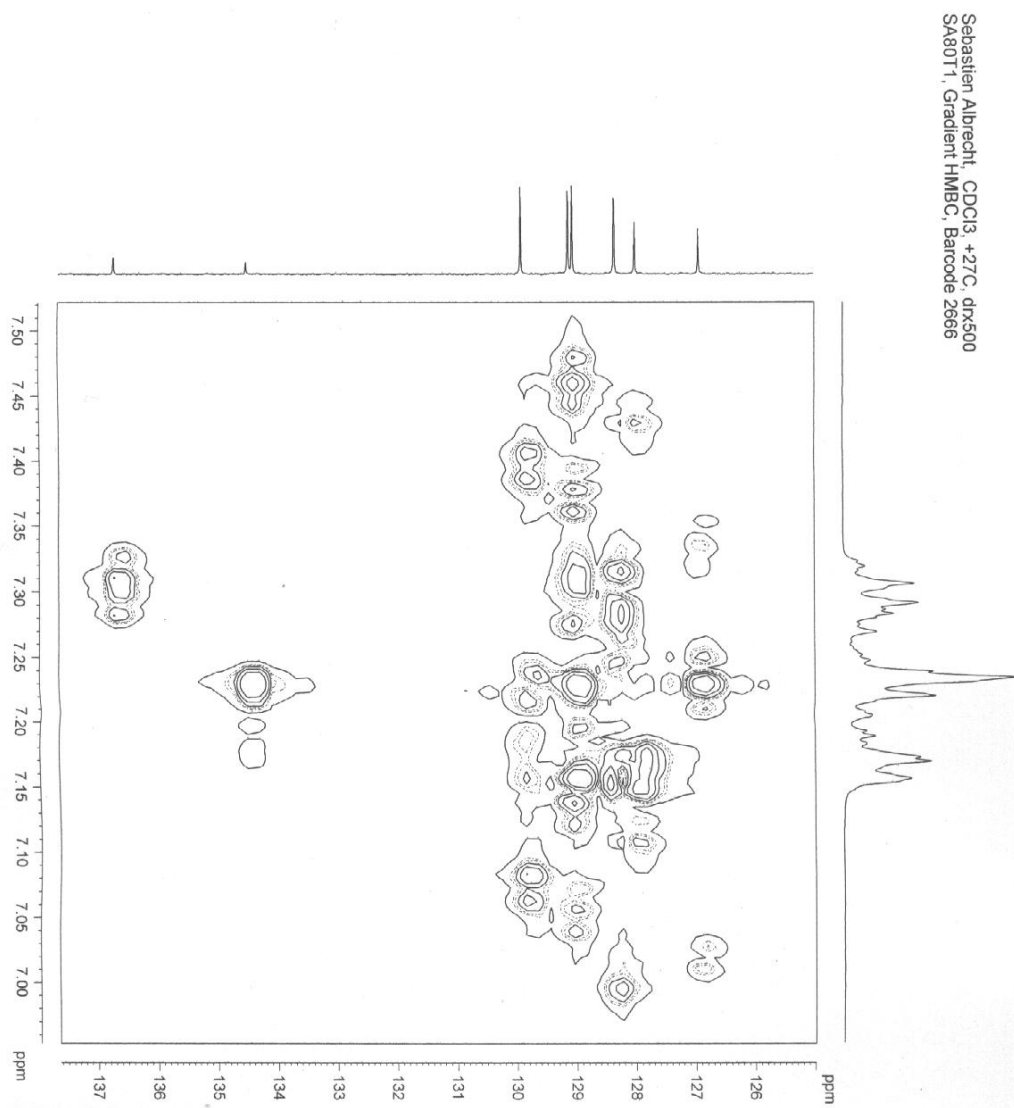

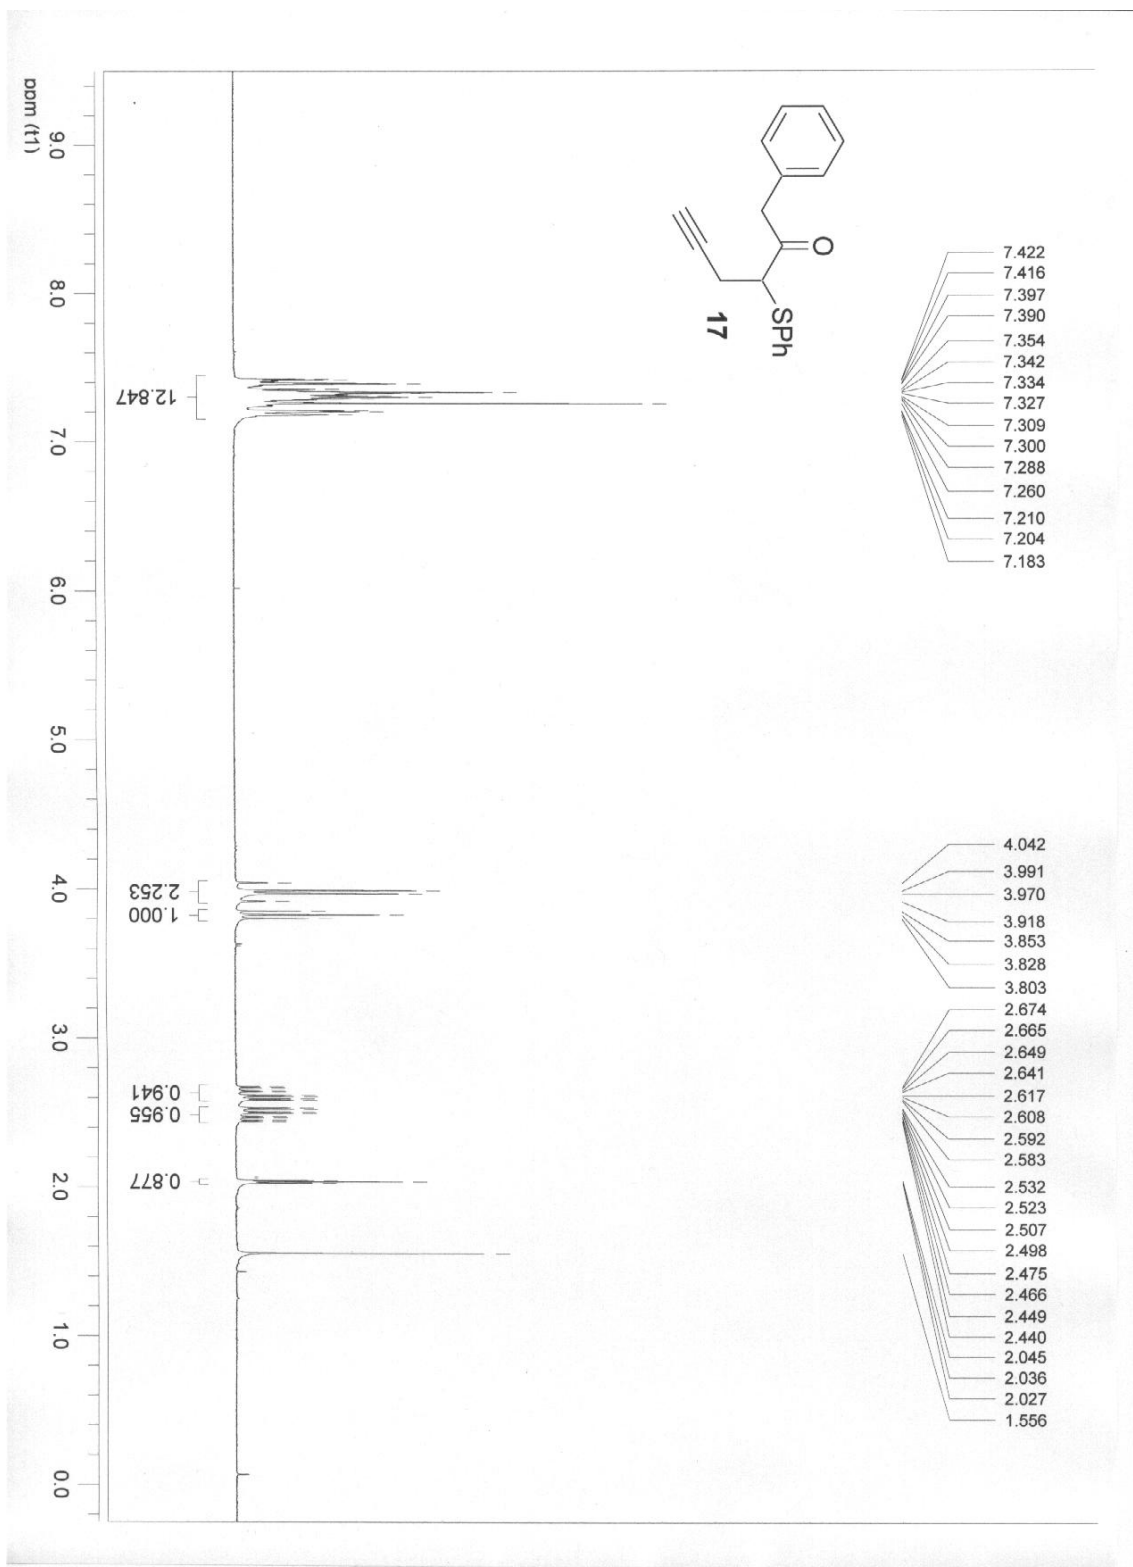

<sup>1</sup>H-NMR (300 MHz, CDCl<sub>3</sub>) of **17**



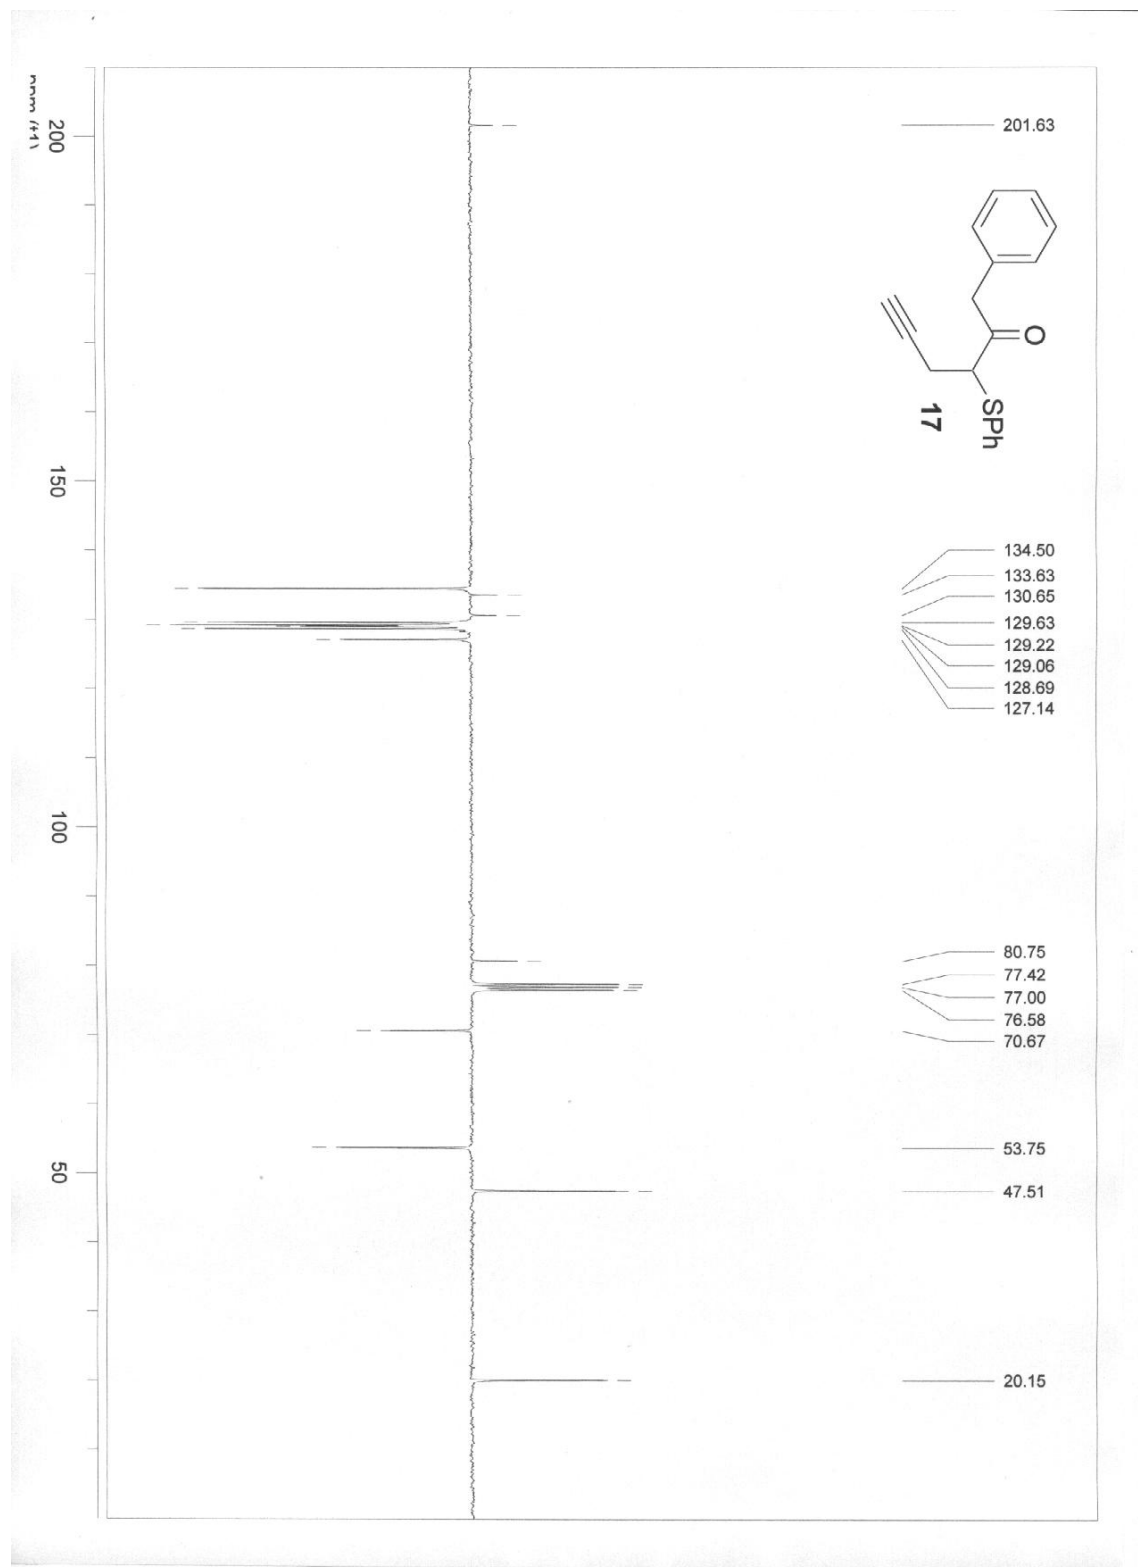

<sup>13</sup>C-NMR (75 MHz, CDCl<sub>3</sub>) of **17**

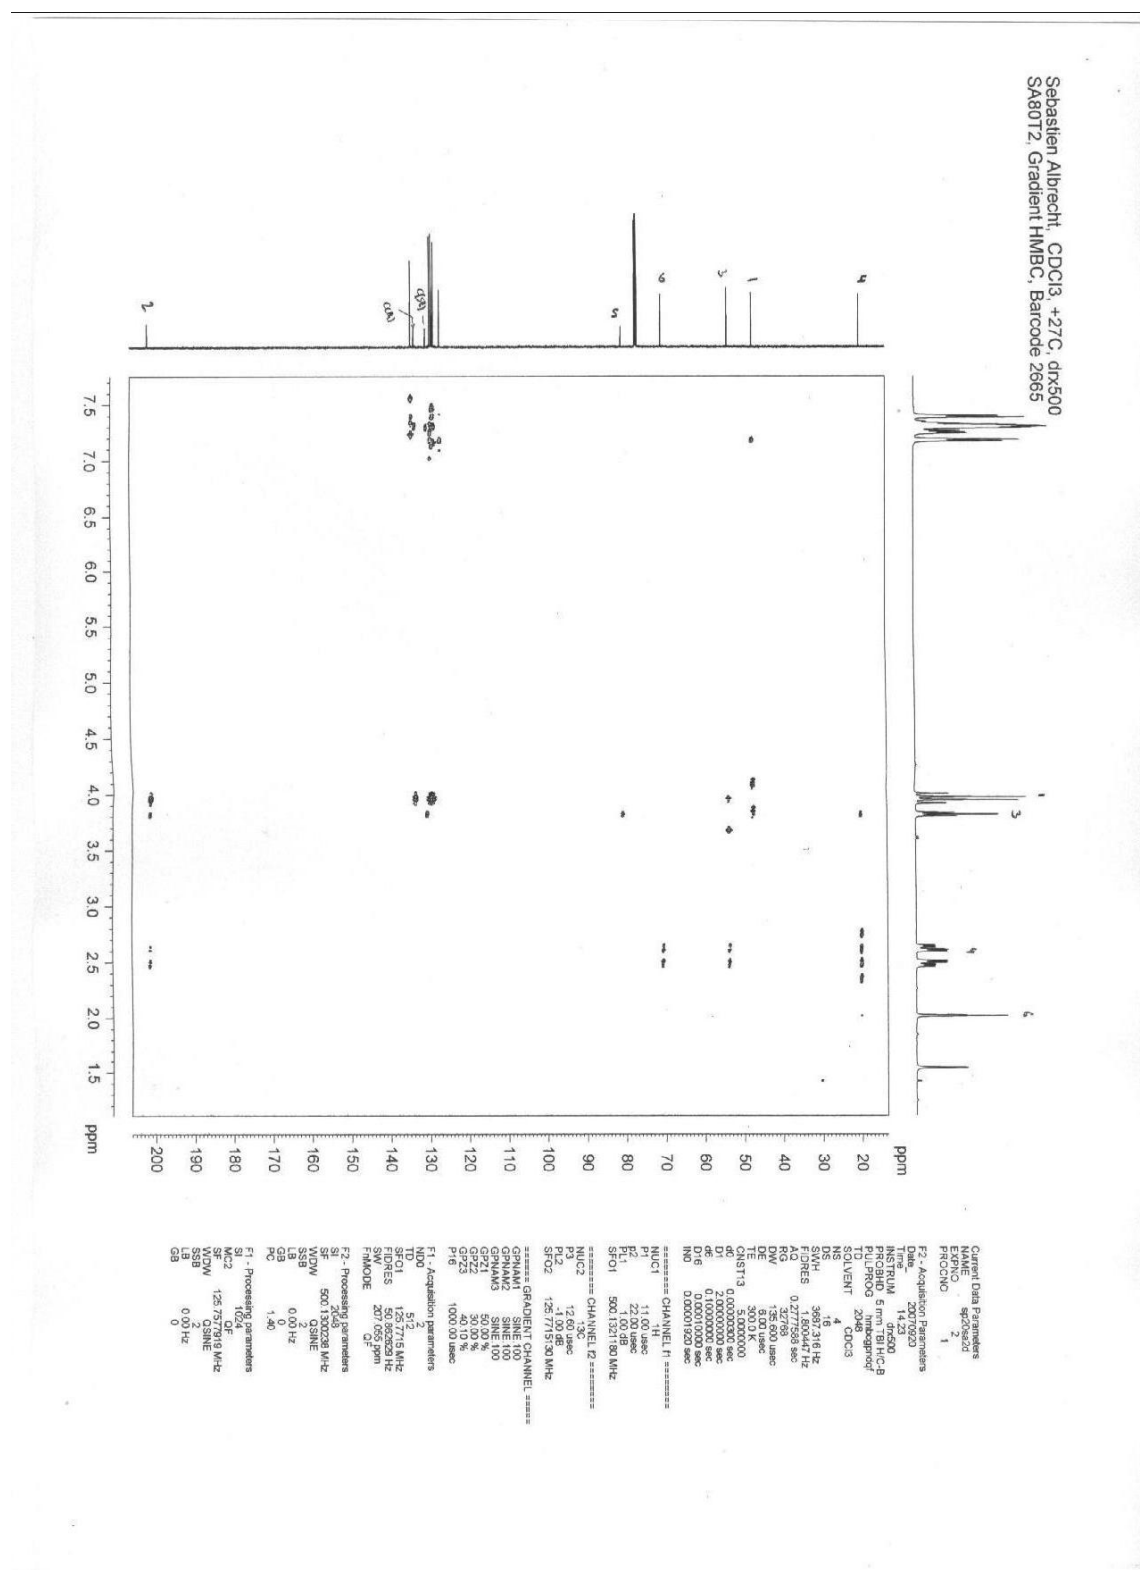

HMBC of 17

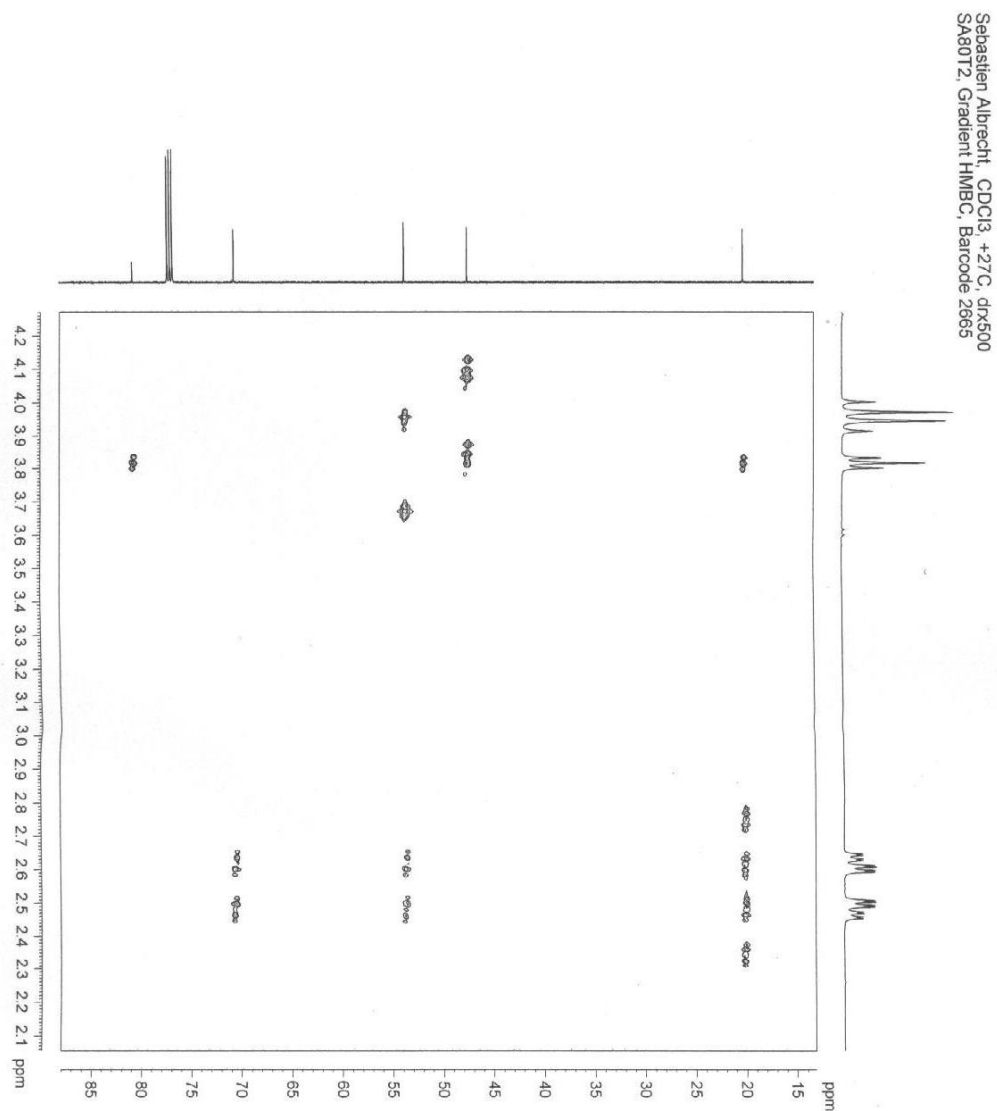

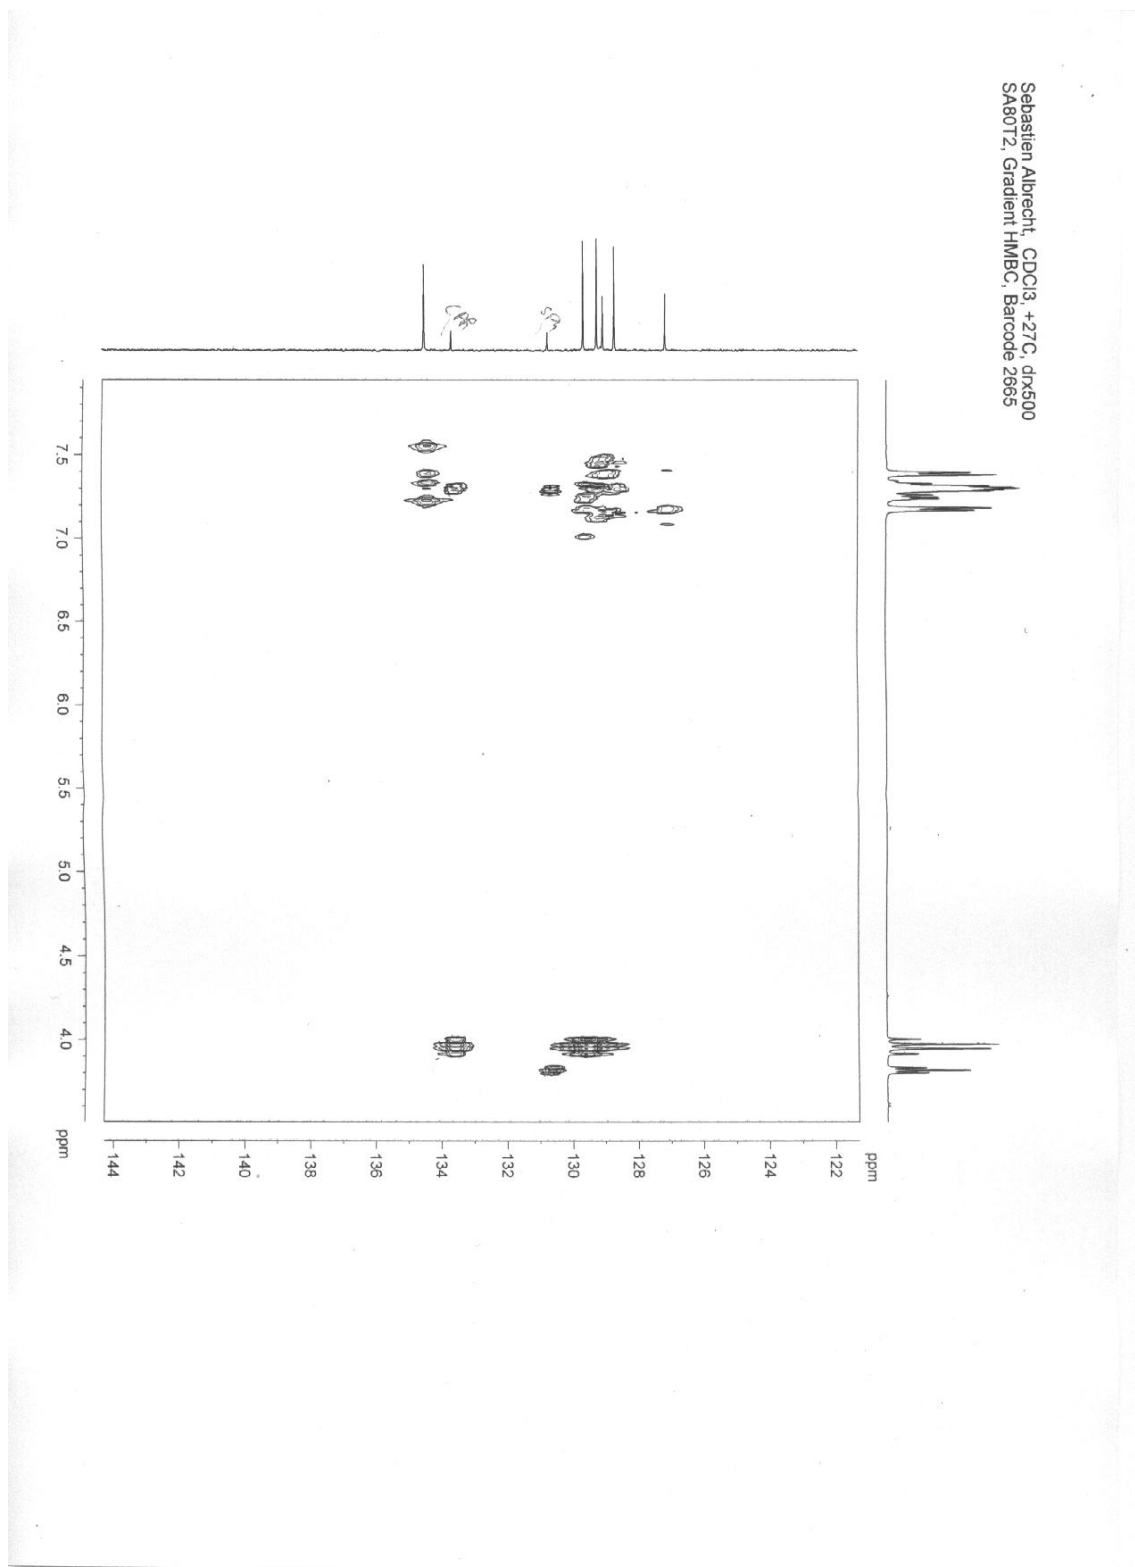

HMBC of **17**

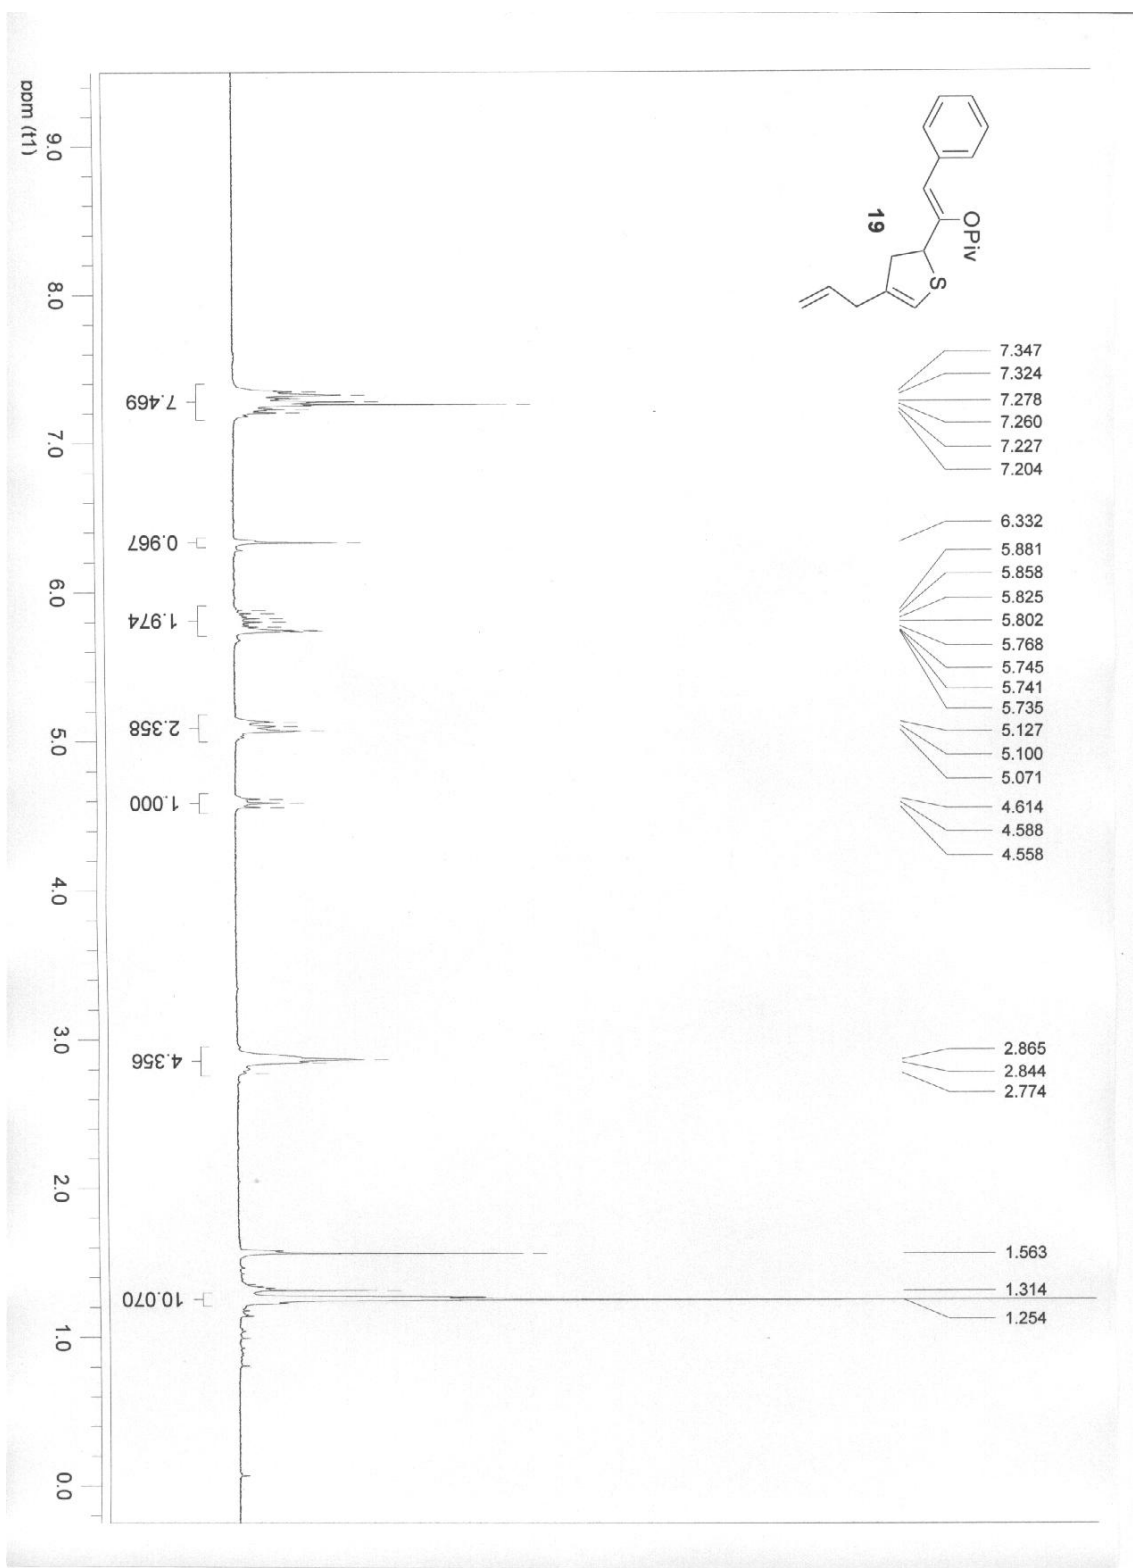

<sup>1</sup>H-NMR (300 MHz, CDCl<sub>3</sub>) of **19**

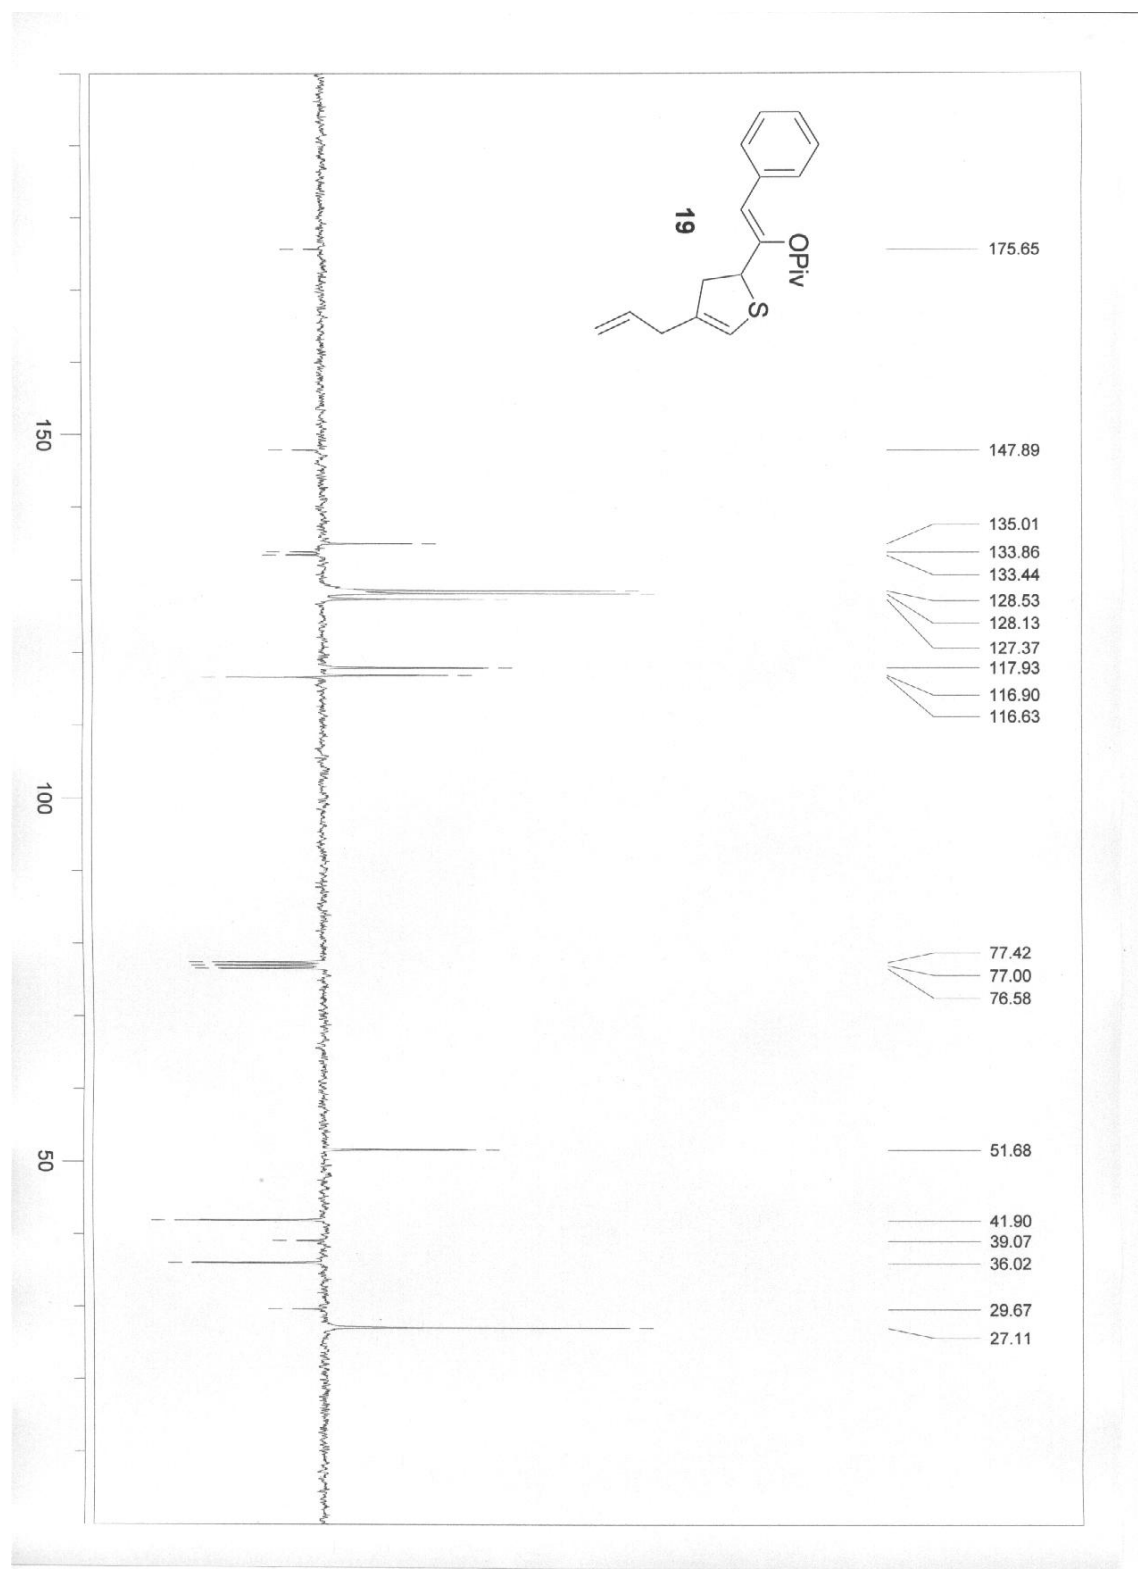

$^{13}\text{C}$ -NMR (75 MHz,  $\text{CDCl}_3$ ) of **19**

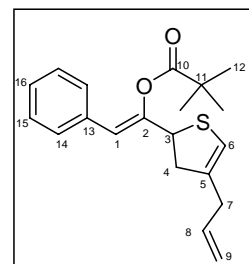

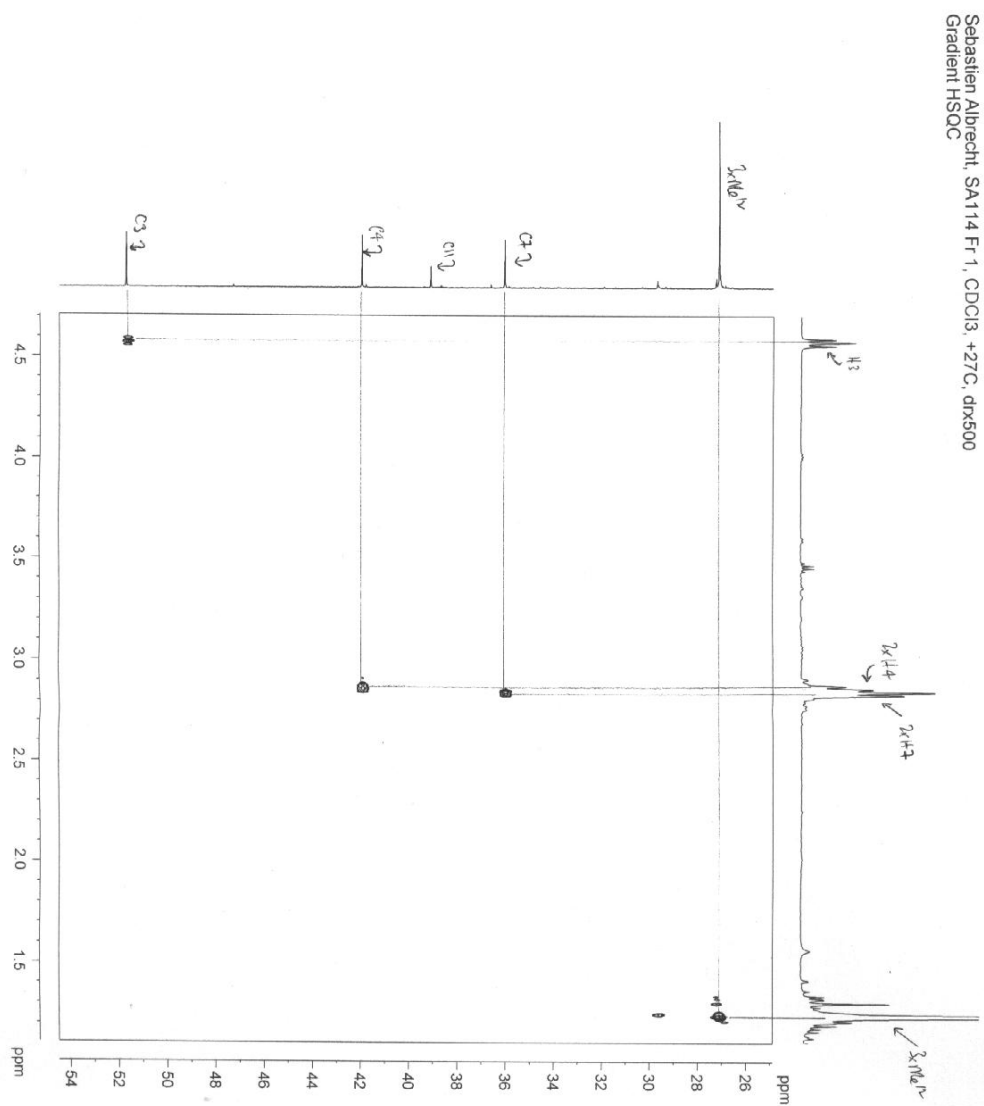



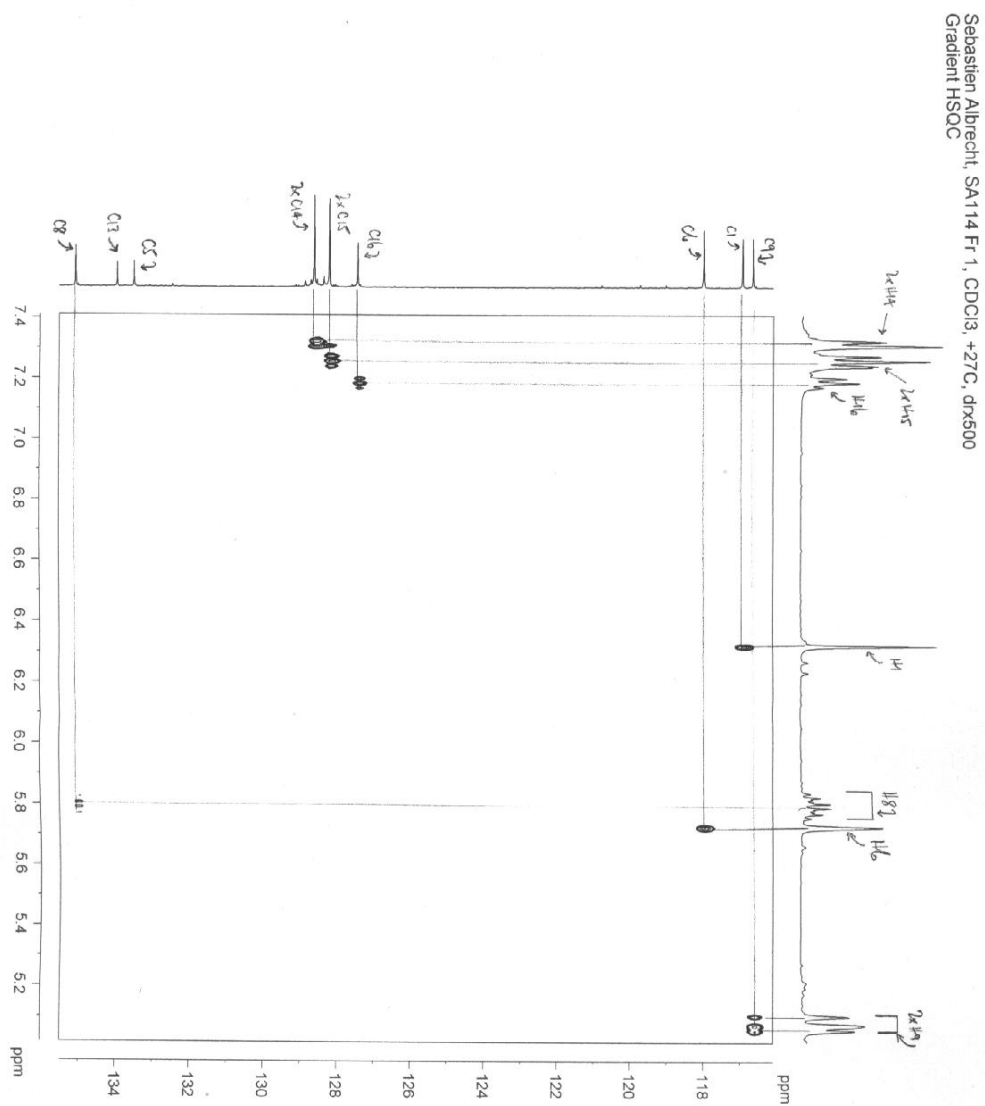

HMBC of **19**

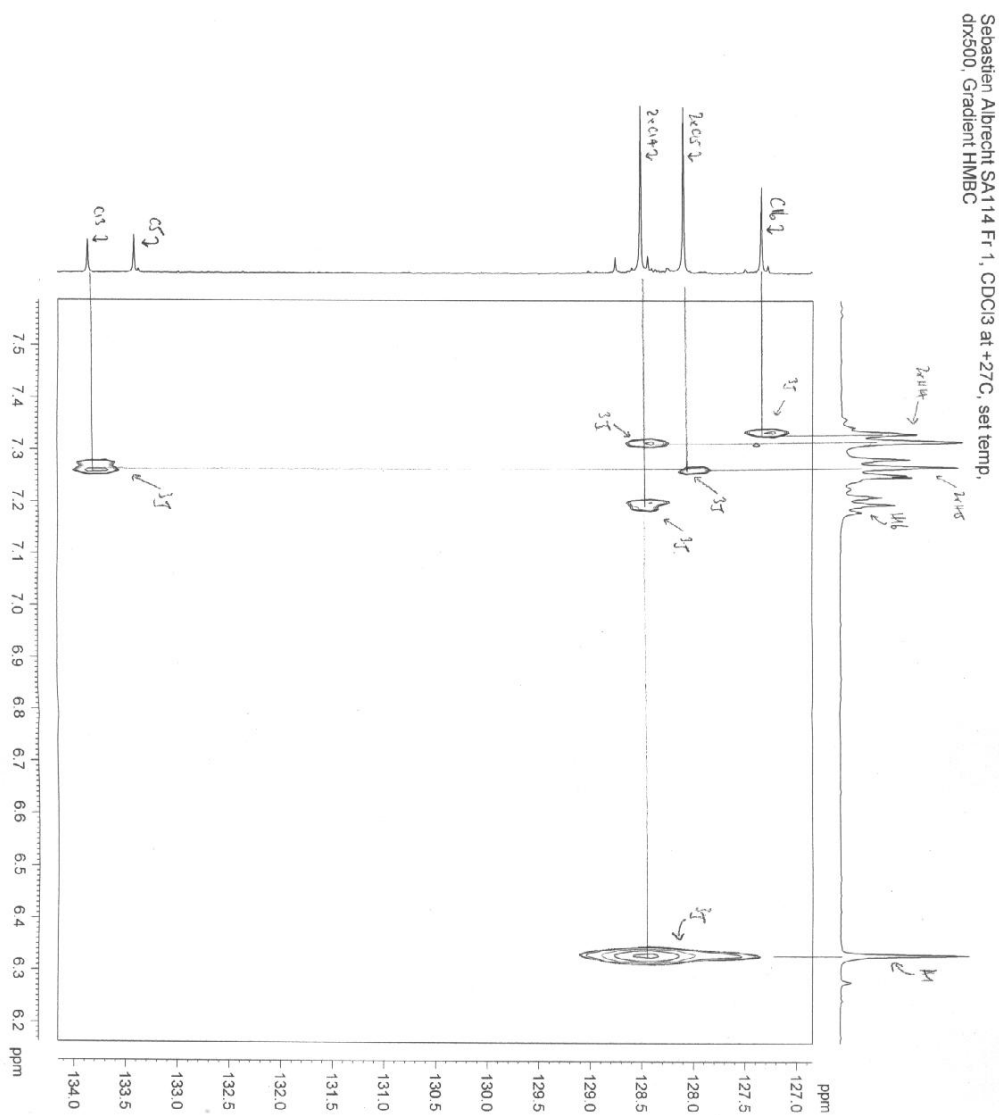

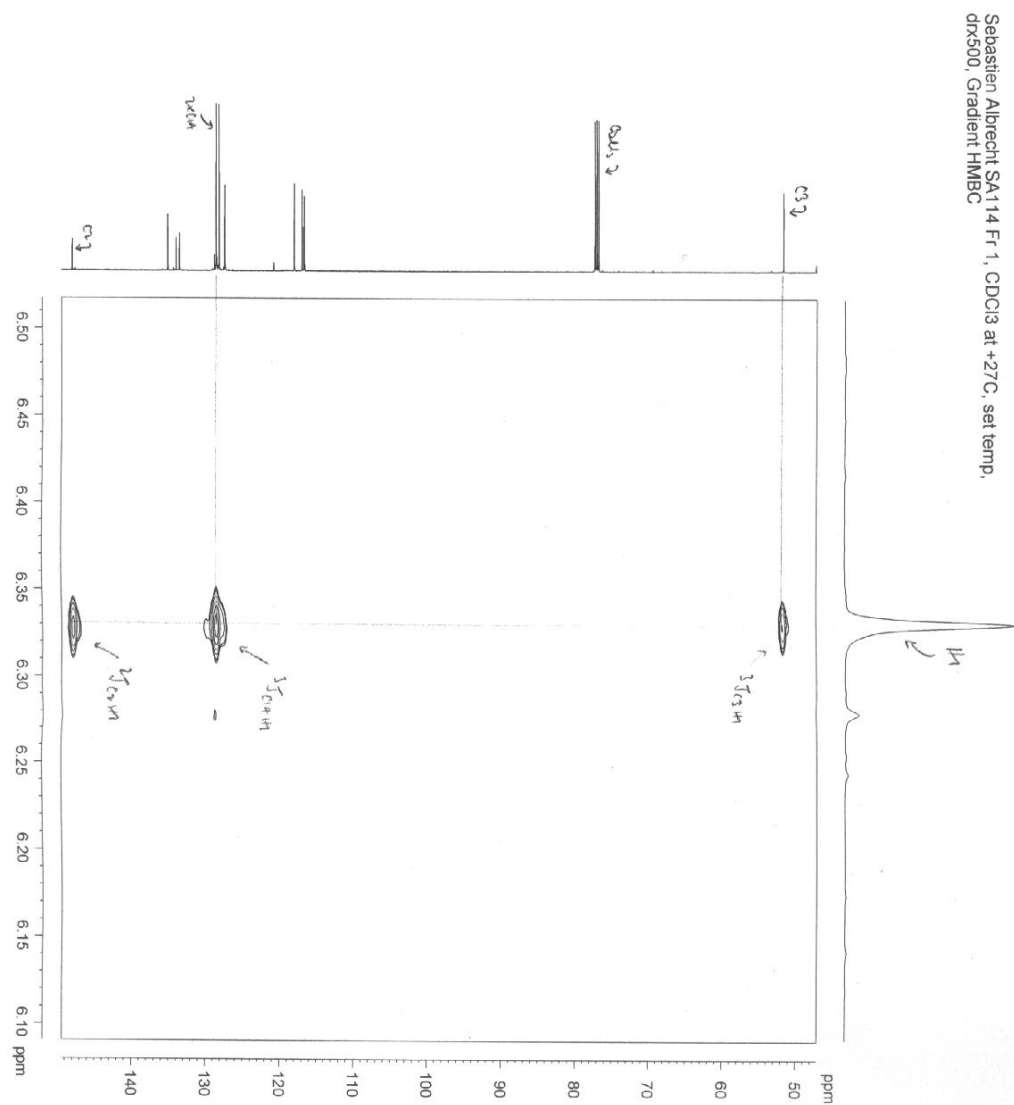

n Albrecht SA114 F1, CDCl3 at +27°C, set temp.  
 Gradient HMBc

4.72 4.70 4.68 4.66 4.64 4.62 4.60 4.58 4.56 4.54 4.52 4.50 4.48 4.46 4.44 ppm

140 130 120 110 100 90 80 70 60 50 40 30 ppm

CH<sub>3</sub>  
 CH<sub>2</sub>  
 CH<sub>2</sub>  
 CH

CH<sub>3</sub>  
 CH<sub>2</sub>  
 CH<sub>2</sub>  
 CH

unassigned <sup>13</sup>C, C<sub>3</sub>/H<sub>3</sub>  
<sup>13</sup>C/H<sub>3</sub>

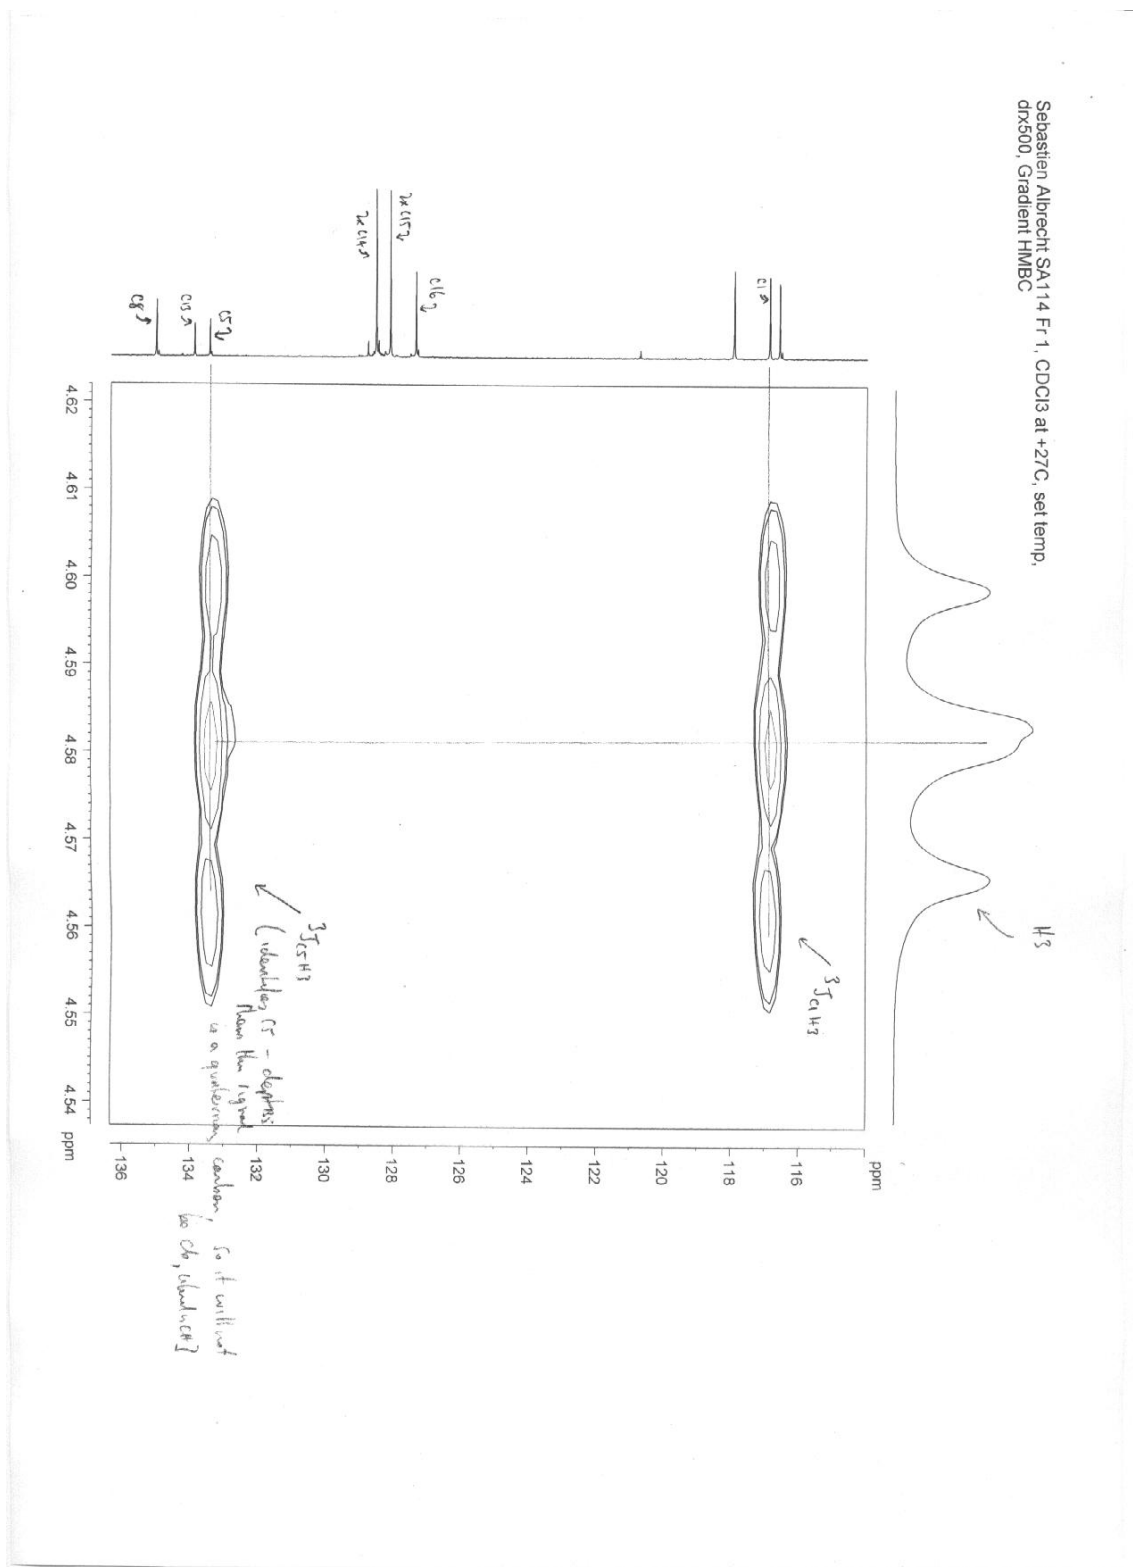

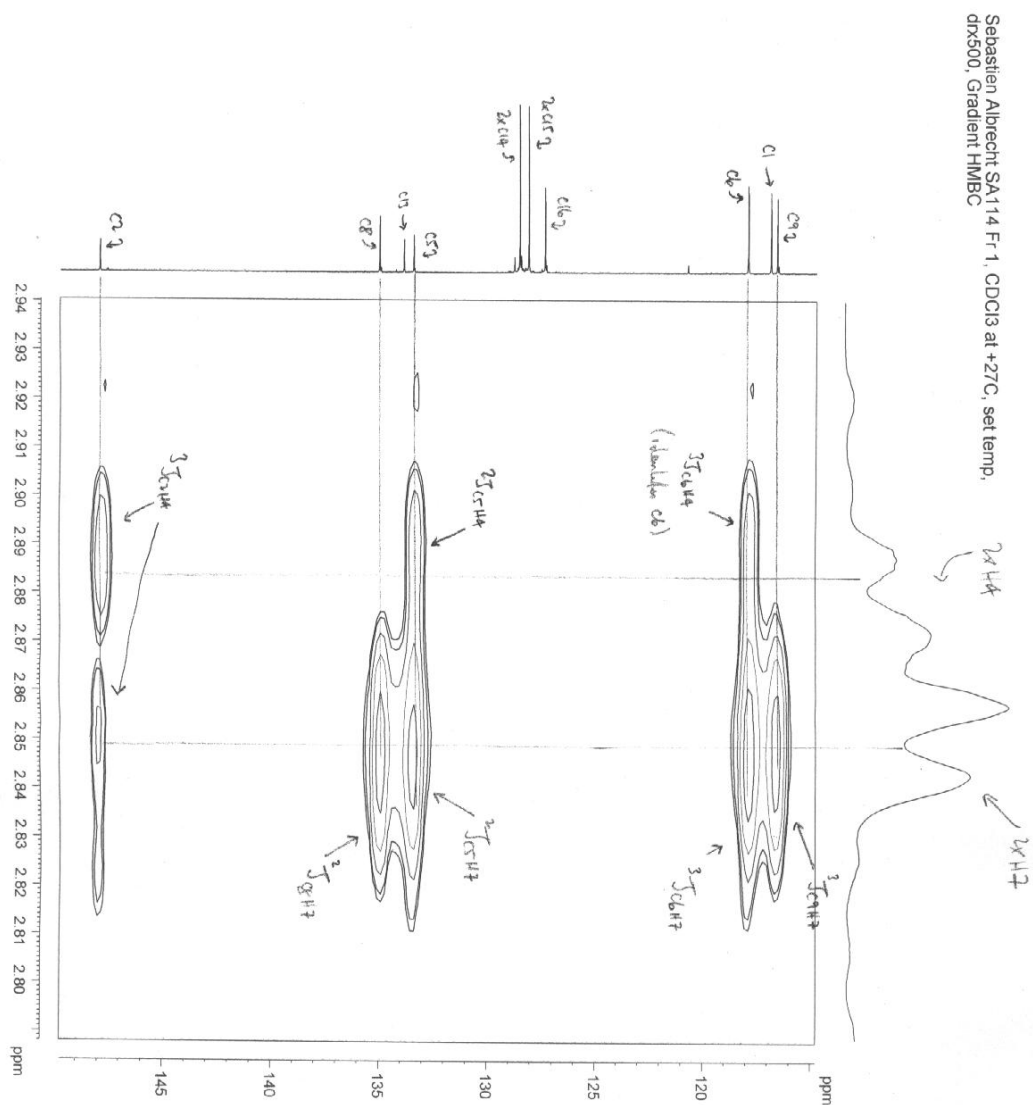

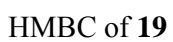



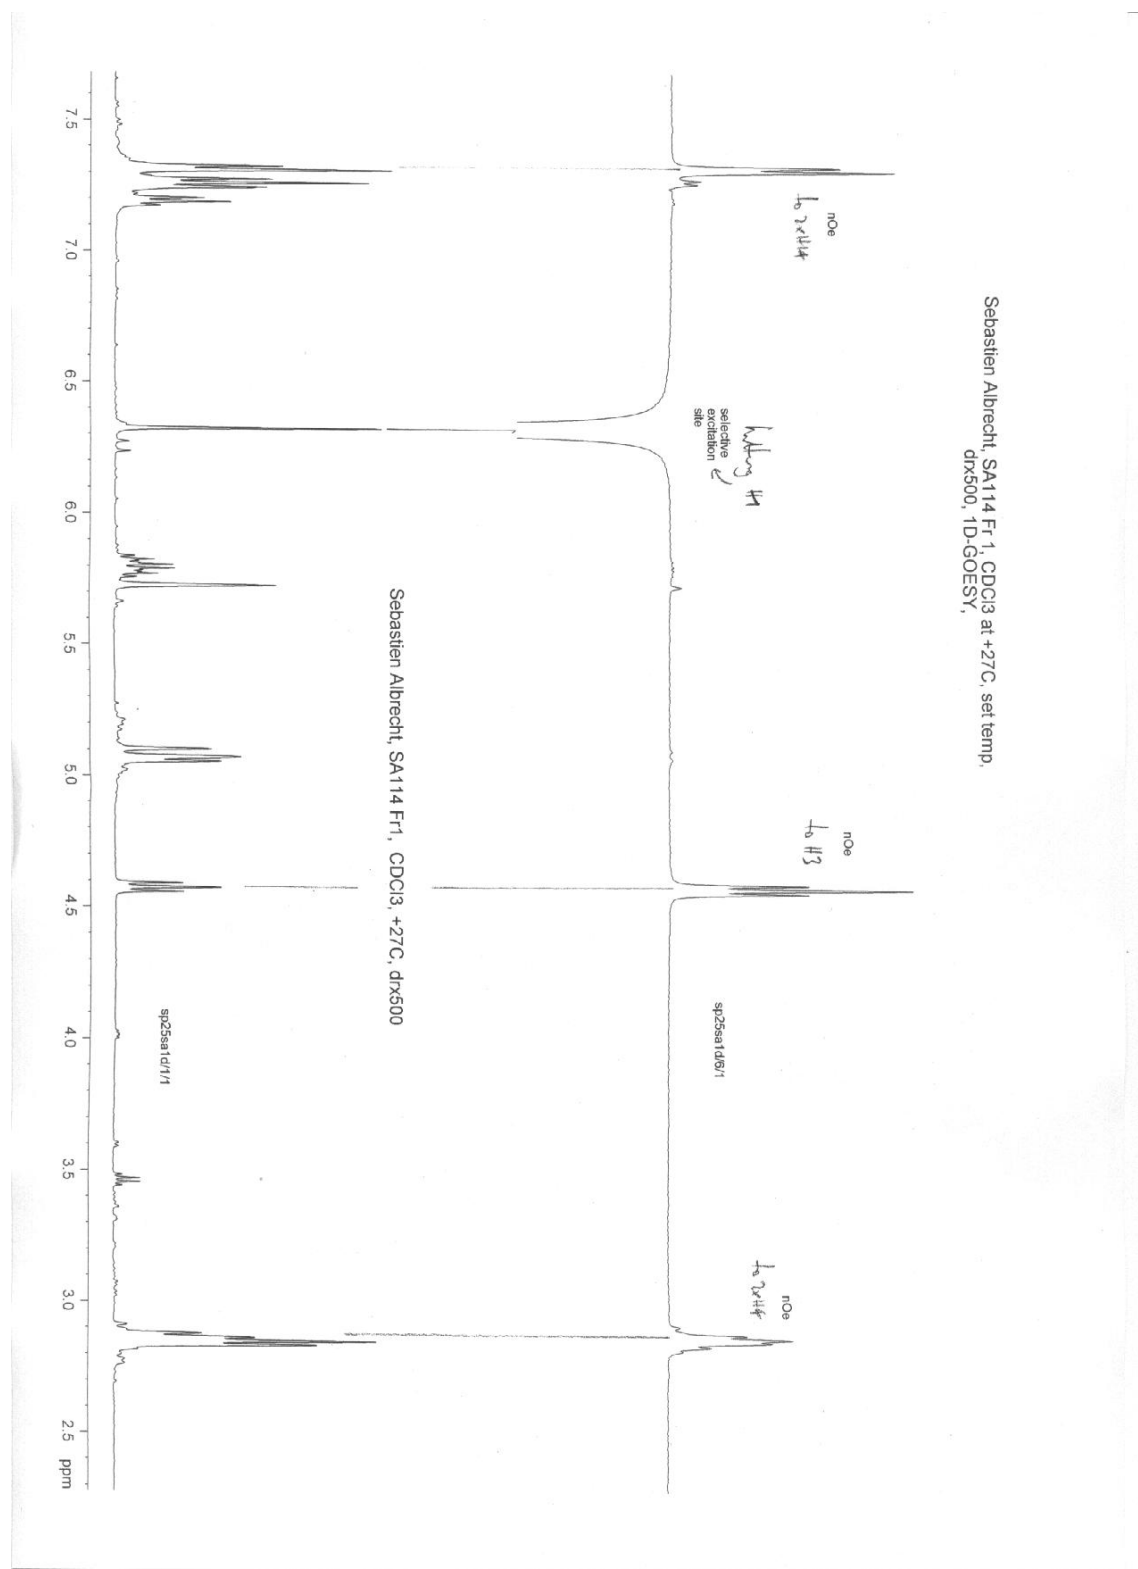

Supplement: b714813e.pdf [file b714813e.pdf]
